# Supplementary material for: Trends in acid suppressant drug prescriptions in primary care in the UK: a population-based cross-sectional study
Source: PubMed Central journal article supplement — BMJ Open. 2020 Dec 7;10(12):e041529. doi: 10.1136/bmjopen-2020-041529 (PMC7722810; doi:10.1136/bmjopen-2020-041529), 2020-12-07

## Table of Contents

|                                                                                                                                                                                         |    |
|-----------------------------------------------------------------------------------------------------------------------------------------------------------------------------------------|----|
| Supplementary Table 1. List of British National Formulary Codes for Proton Pump Inhibitors.....                                                                                         | 2  |
| Supplementary Table 2. List of British National Formulary Codes for Histamine-2 Receptor Antagonists .....                                                                              | 3  |
| Supplementary Table 3. Sex Stratified Indications for Individuals Newly Prescribed Proton Pump Inhibitors and Histamine-2 Receptor Antagonists.....                                     | 4  |
| Supplementary Table 4. Changes in Prescribing Intensity Over 5-Year Intervals for Proton Pump Inhibitors and Histamine-2 Receptor Antagonists.....                                      | 5  |
| Supplementary Table 5. Reason for Discontinuation of Initial Acid Suppressant Treatment Course Under Alternate Grace Periods.....                                                       | 6  |
| Supplementary Figure 1. Incidence of Indications for Proton Pump Inhibitors and Histamine-2 Receptor Antagonists Over Time .....                                                        | 7  |
| Supplementary Figure 2. Overall Prevalence of Proton Pump Inhibitor and Histamine-2 Receptor Antagonist Use in New Users.....                                                           | 8  |
| Supplementary Figure 3. Sex-stratified Prevalence of Proton Pump Inhibitor and Histamine-2 Receptor Antagonist Use in New Users .....                                                   | 9  |
| Supplementary Figure 4. Age-stratified Prevalence of A) Proton Pump Inhibitor Use and b) Histamine-2 Receptor Antagonist Use in New Users.....                                          | 10 |
| Supplementary Figure 5. Prevalence of A) Proton Pump Inhibitor Prescriptions and B) Histamine-2 Receptor Antagonist Prescriptions Stratified by Individual Drug Type.....               | 11 |
| Supplementary Figure 6. Prescribing Intensity of Proton Pump Inhibitors and Histamine-2 Receptor Antagonists .....                                                                      | 12 |
| Supplementary Figure 7. Persistence to Original Treatment Course for Proton Pump Inhibitor and Histamine-2 Receptor Antagonist Initiators with Evidence-based Indications for Use.....  | 13 |
| Supplementary Figure 8. Persistence to Original Treatment Course for Proton Pump Inhibitor and Histamine-2 Receptor Antagonist Initiators with Non-evidence Based Gastroprotection..... | 14 |
| Supplementary Figure 9. Persistence to Original Treatment Course for Proton Pump Inhibitor and Histamine-2 Receptor Antagonist Initiators with Off-label Indications for Use.....       | 15 |
| Supplementary Figure 10. Persistence to Original Treatment Course for Proton Pump Inhibitor and Histamine-2 Receptor Antagonist Initiators with No Recorded Indication for Use.....     | 16 |

---

**Supplementary Table 1. List of British National Formulary Codes for Proton Pump Inhibitors**

---

| <b>British National Formulary Code</b> | <b>British National Formulary Header</b>                     |
|----------------------------------------|--------------------------------------------------------------|
| 01030500/05010103                      | Proton Pump Inhibitors/Broad-spectrum Penicillins            |
| 01030500/10010100                      | Proton Pump Inhibitors/Non-steroidal Anti-inflammatory Drugs |
| 01030500/05010500                      | Proton Pump Inhibitors/Macrolides                            |
| 1030500                                | Proton Pump Inhibitors                                       |

---

---

**Supplementary Table 2. List of British National Formulary Codes for Histamine-2 Receptor Antagonists**

---

| <b>British National Formulary Code</b> | <b>British National Formulary Header</b>               |
|----------------------------------------|--------------------------------------------------------|
| 1030100                                | H2 receptor antagonists                                |
| 01030100/01010201                      | H2 receptor antagonists/Alginate preparations          |
| 01030300/01030100                      | Chelates and complexes/H2 receptor antagonists         |
| 01030300/01030100                      | Chelates and complexes/H2 receptor antagonists         |
| 01030100/01010202                      | H2 receptor antagonists/Indigestion remedies           |
| 01010201/01030100                      | Compound Alginate Preparations/H2-Receptor Antagonists |
| 01010202/01030100                      | Indigestion Preparations/H2-Receptor Antagonists       |

---

Abbreviations: H2, Histamine-2.

**Supplementary Table 3. Sex Stratified Indications for Individuals Newly Prescribed Proton Pump Inhibitors and Histamine-2 Receptor Antagonists**

| Indication                                             | Male           | Female         |
|--------------------------------------------------------|----------------|----------------|
| Proton Pump Inhibitor, n (%)<br>(n = 1,699,837)        | 768,781 (45.2) | 931,056 (54.8) |
| Evidence-based indication, n (%) <sup>§</sup>          | 342,934 (44.6) | 397,243 (42.7) |
| Dyspepsia                                              | 141,072        | 175,759        |
| Gastroprotection                                       | 132,637        | 155,723        |
| Gastro-oesophageal reflux disease                      | 73,683         | 84,722         |
| Peptic ulcer disease                                   | 31,416         | 18,823         |
| Helicobacter pylori infection                          | 19,001         | 22,429         |
| Barrett's oesophagus                                   | 2,724          | 1,456          |
| Zollinger-Ellison syndrome                             | 17             | 7              |
| Non-evidence based gastroprotection, n (%)             | 165,252 (21.5) | 198,740 (21.3) |
| Off-label indication, n (%) <sup>§</sup>               | 97,248 (12.6)  | 156,343 (16.8) |
| Stomach pain                                           | 85,628         | 146,087        |
| Gastritis or duodenitis                                | 17,091         | 18,817         |
| No recorded indication, n (%)                          | 163,347 (21.2) | 178,730 (19.2) |
| Histamine-2 Receptor Antagonists, n (%)<br>(n=385,988) | 167,683 (43.4) | 218,305 (56.6) |
| Evidence-based indication, n (%) <sup>§</sup>          | 77,482 (46.2)  | 97,354 (44.6)  |
| Dyspepsia                                              | 49,650         | 63,087         |
| Gastroprotection                                       | 16,809         | 24,541         |
| Gastro-oesophageal reflux disease                      | 14,151         | 19,329         |
| Peptic ulcer disease                                   | 8,834          | 5,619          |
| Helicobacter pylori infection                          | 1,127          | 1,399          |
| Barrett's oesophagus                                   | 80             | 57             |
| Zollinger-Ellison syndrome                             | S*             | S*             |
| Non-evidence based gastroprotection, n (%)             | 22,644 (13.5)  | 28,832 (13.2)  |
| Off-label indication, n (%) <sup>§</sup>               | 29,227 (17.4)  | 43,204 (19.8)  |
| Stomach pain                                           | 24,765         | 39,423         |
| Gastritis or duodenitis                                | 6,315          | 6,781          |
| No recorded indication, n (%)                          | 38,330 (22.9)  | 48,915 (22.4)  |

<sup>§</sup> Indication categories are not mutually exclusive.

S\* Numbers <5 are not displayed, as per the confidentially practices of the Clinical Practice Research Datalink.

**Supplementary Table 4. Changes in Prescribing Intensity Over 5-Year Intervals for Proton Pump Inhibitors and Histamine-2 Receptor Antagonists**

| <b>Interval</b> | <b>Proton Pump Inhibitor IRR (95% CI)</b> | <b>Histamine-2 Receptor Antagonists IRR (95% CI)</b> |
|-----------------|-------------------------------------------|------------------------------------------------------|
| 1990-1994       | 1.47 (1.39 – 1.54)                        | 0.79 (0.76 – 0.81)                                   |
| 1995-1999       | 1.14 (1.13 – 1.16)                        | 0.90 (0.90 – 0.91)                                   |
| 2000-2004       | 1.07 (1.06 – 1.08)                        | 0.87 (0.87 – 0.87)                                   |
| 2005-2009       | 1.01 (1.01 – 1.01)                        | 0.86 (0.84 – 0.87)                                   |
| 2010-2014       | 0.99 (0.99 – 1.00)                        | 0.97 (0.95 – 0.99)                                   |
| 2015-2018       | 0.97 (0.97 – 0.97)                        | 1.05 (1.05 – 1.05)                                   |

Abbreviations: IRR: Incidence rate ratio; CI: confidence interval.

**Supplementary Table 5. Reason for Discontinuation of Initial Acid Suppressant Treatment Course Under Alternate Grace Periods**

| <b>Reason for Discontinuation</b> | <b>Proton Pump Inhibitors<br/>(n=1,699,837)</b> | <b>Histamine-2 Receptor Antagonists<br/>(n=385,988)</b> |
|-----------------------------------|-------------------------------------------------|---------------------------------------------------------|
| <b>7 Day Grace Period †</b>       |                                                 |                                                         |
| Switch to other class             | 31,818 (1.9)                                    | 111,100 (28.8)                                          |
| Treatment gap > 7 days            | 1,020,369 (60.0)                                | 147,753 (38.3)                                          |
| Administrative Censoring          | 647,650 (38.1)                                  | 127,135 (32.9)                                          |
| <b>60 Day Grace Period ‡</b>      |                                                 |                                                         |
| Switch to other class             | 54,783 (3.2)                                    | 135,039 (35.0)                                          |
| Treatment gap > 60 days           | 778,676 (45.8)                                  | 103,837 (26.9)                                          |
| Administrative Censoring          | 866,378 (51.0)                                  | 147,112 (38.1)                                          |

† median (interquartile range) duration of first treatment course for PPI users and H2RA users was 66 (36 to 560) and 149 (38 to 1,479) days, respectively.

‡ median (interquartile range) duration of first treatment course for PPI users and H2RA users was 231 (89 to 1,097) and 381 (91 to 1,785) days, respectively.

### Supplementary Figure 1. Incidence of Indications for Proton Pump Inhibitors and Histamine-2 Receptor Antagonists Over Time

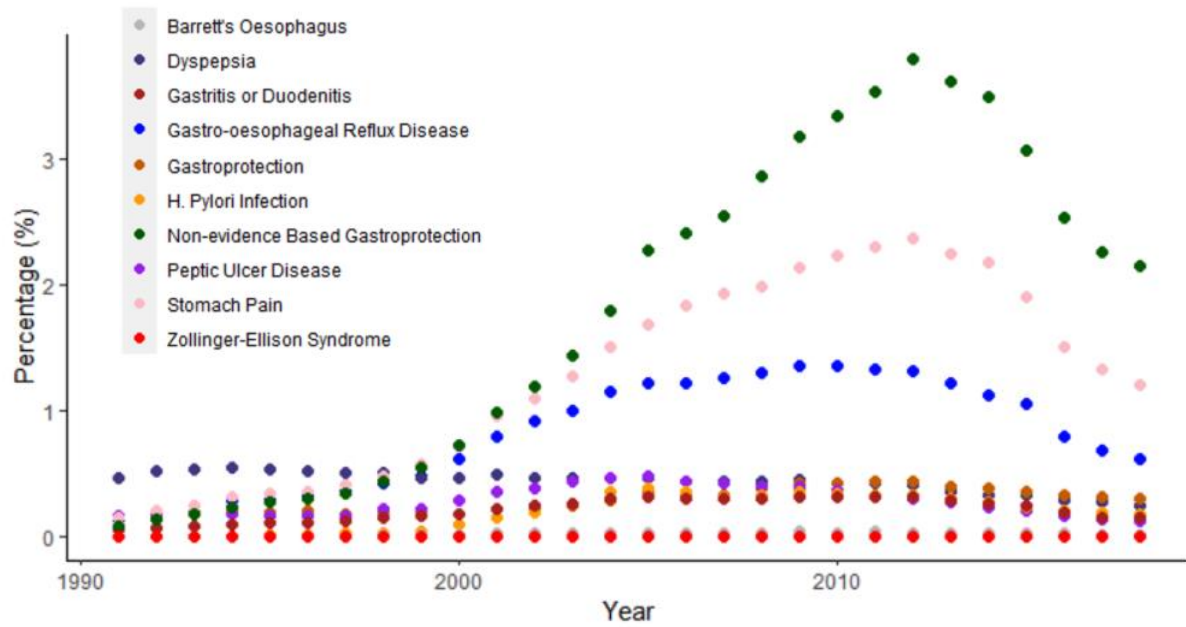

### Supplementary Figure 2. Overall Prevalence of Proton Pump Inhibitor and Histamine-2 Receptor Antagonist Use in New Users

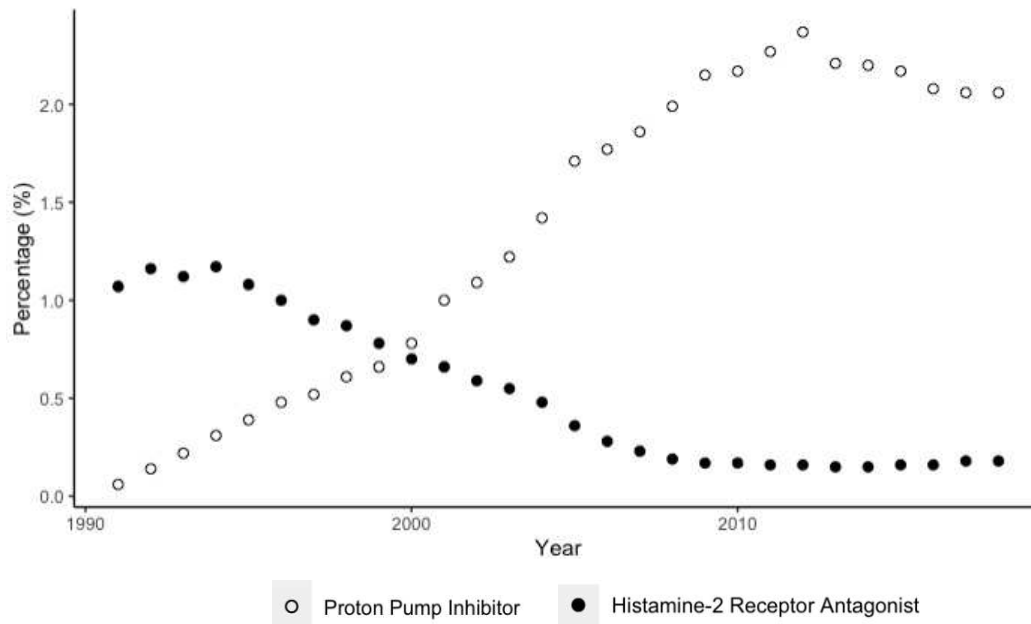



### Supplementary Figure 3. Sex-stratified Prevalence of Proton Pump Inhibitor and Histamine-2 Receptor Antagonist Use in New Users

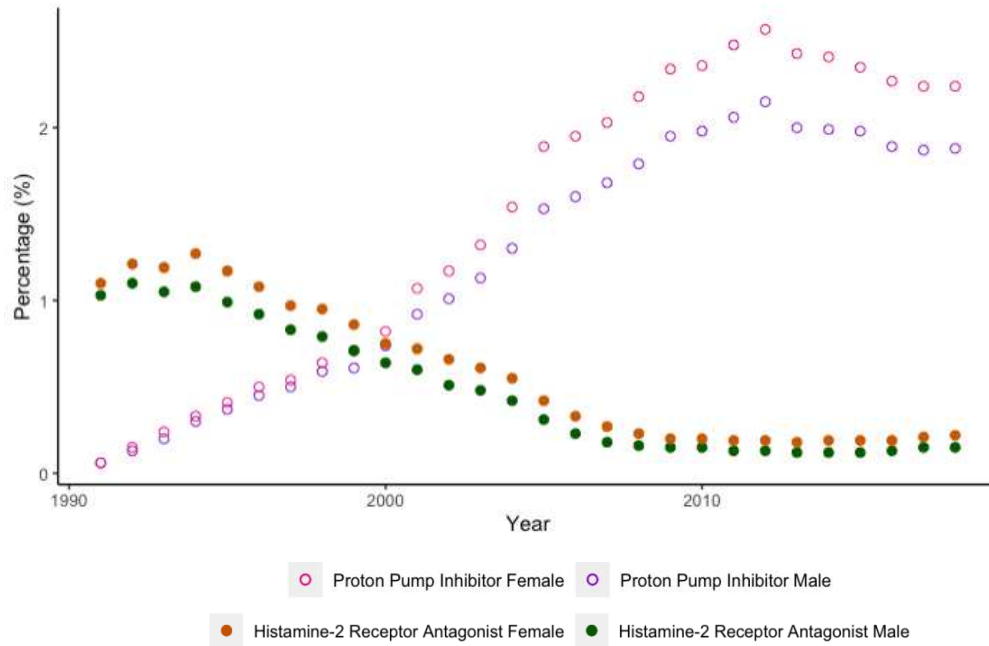

**Supplementary Figure 4. Age-stratified Prevalence of A) Proton Pump Inhibitor Use and b) Histamine-2 Receptor Antagonist Use in New Users**

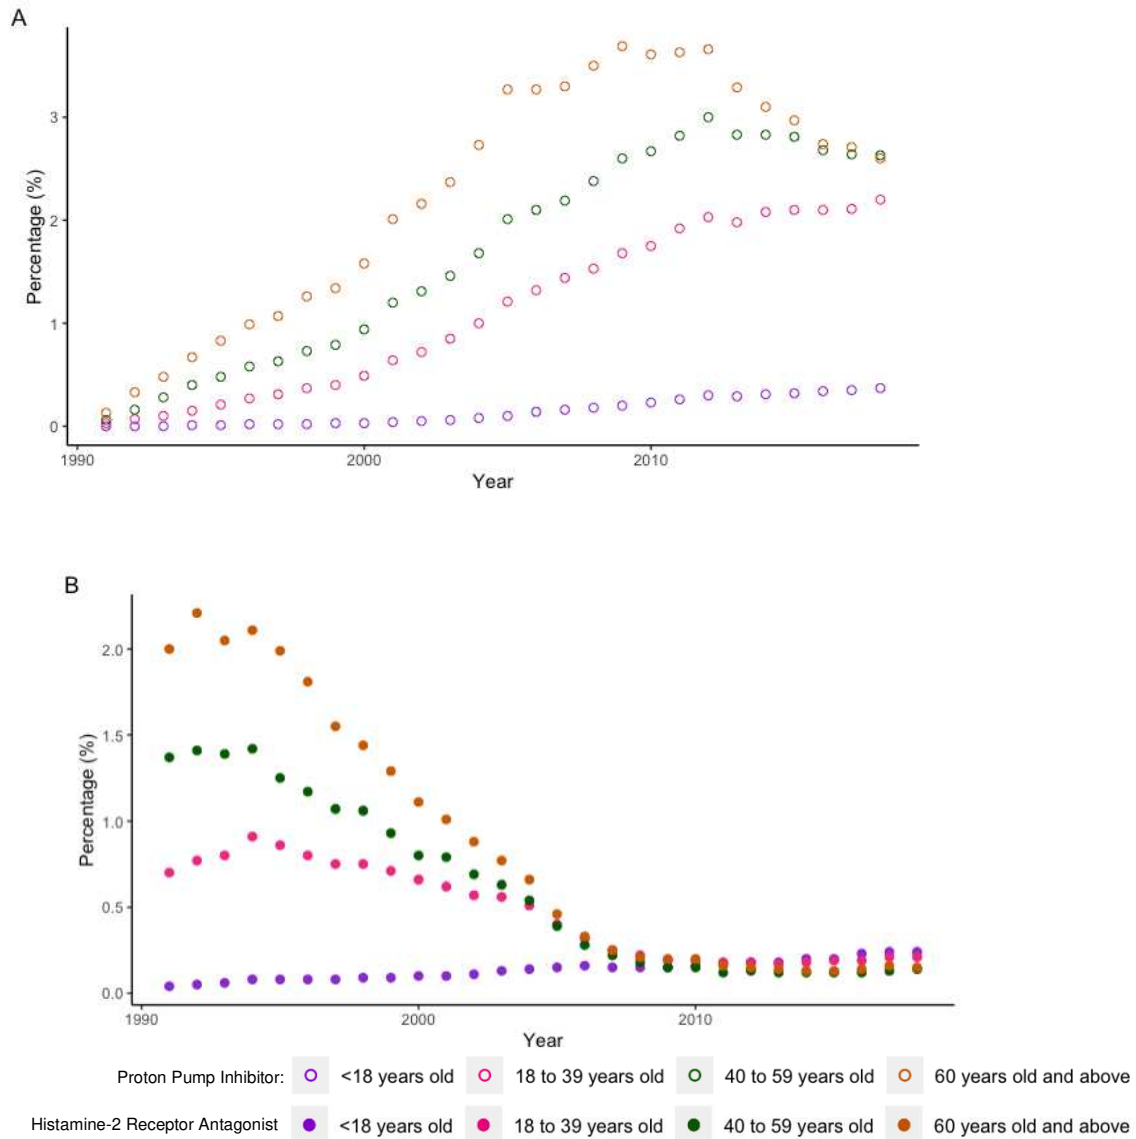

**Supplementary Figure 5. Prevalence of A) Proton Pump Inhibitor Prescriptions and B) Histamine-2 Receptor Antagonist Prescriptions Stratified by Individual Drug Type**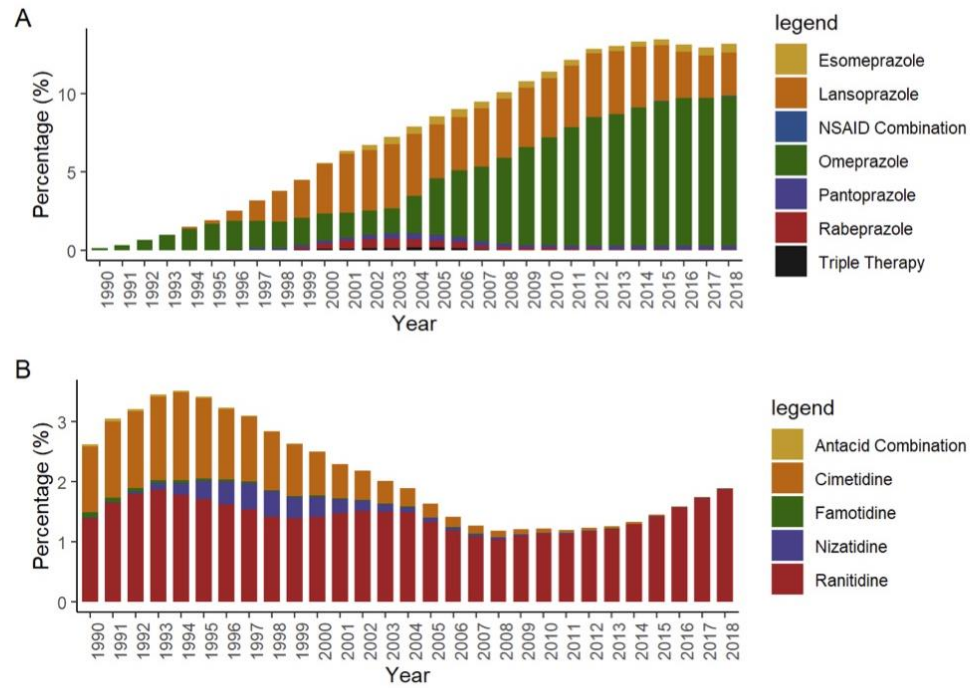

### Supplementary Figure 6. Prescribing Intensity of Proton Pump Inhibitors and Histamine-2 Receptor Antagonists

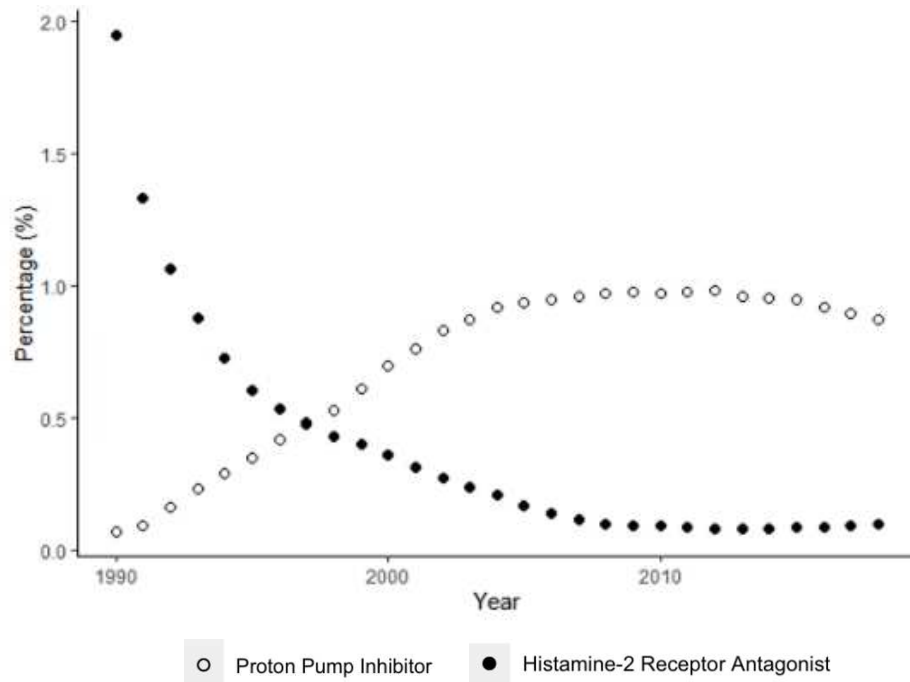

**Supplementary Figure 7. Persistence to Original Treatment Course for Proton Pump Inhibitor and Histamine-2 Receptor Antagonist Initiators with Evidence-based Indications for Use**

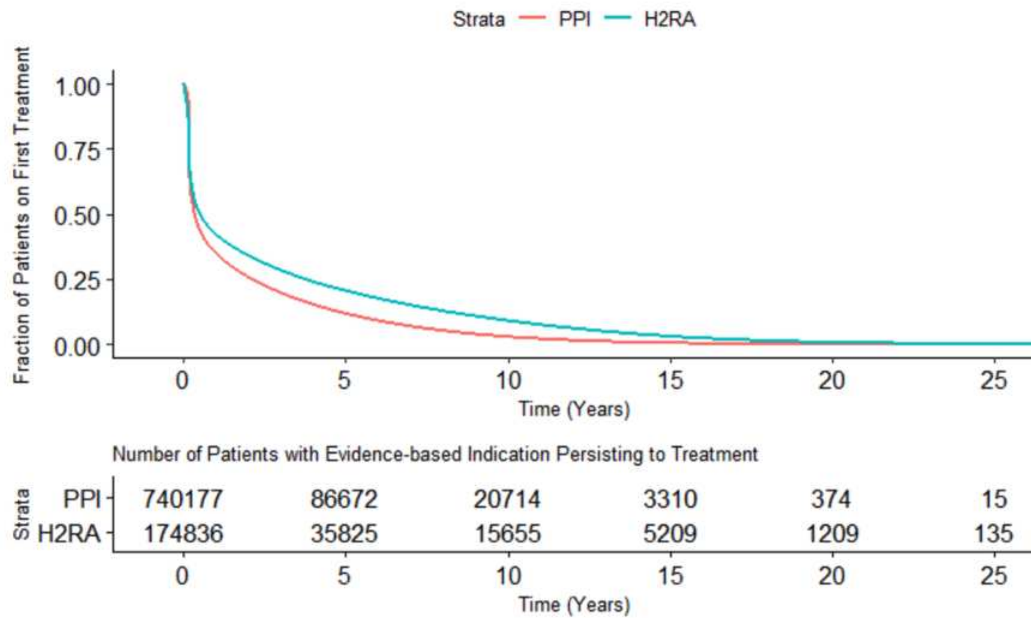

**Supplementary Figure 8. Persistence to Original Treatment Course for Proton Pump Inhibitor and Histamine-2 Receptor Antagonist Initiators with Non-evidence Based Gastroprotection**

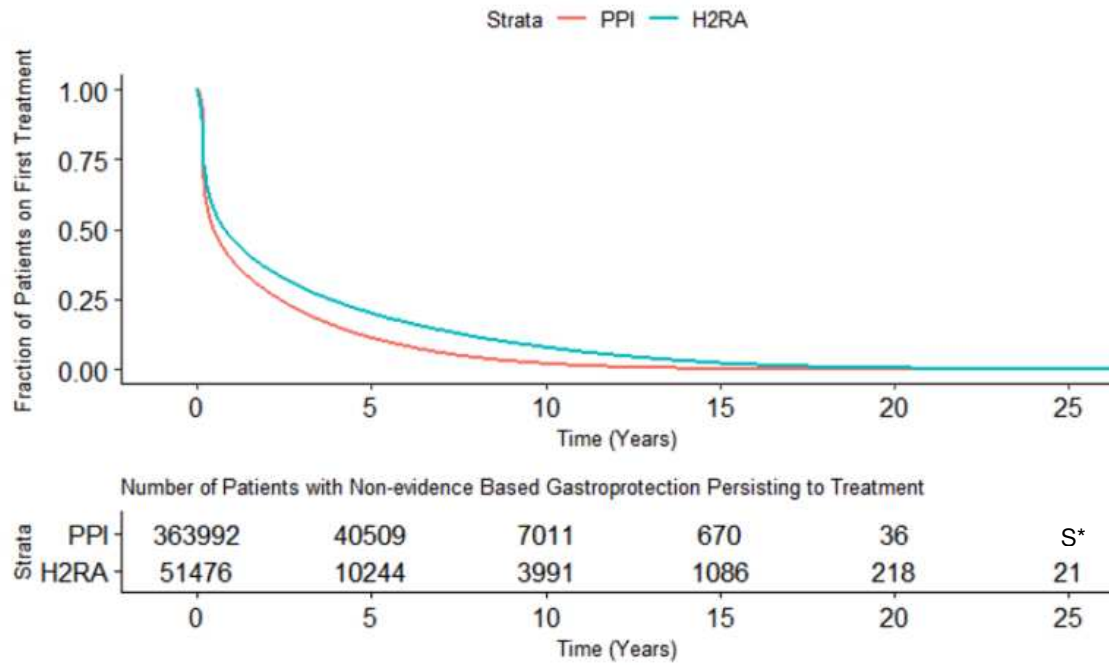

S\* Numbers <5 are not displayed, as per the confidentiality practices of the Clinical Practice Research Datalink.

**Supplementary Figure 9. Persistence to Original Treatment Course for Proton Pump Inhibitor and Histamine-2 Receptor Antagonist Initiators with Off-label Indications for Use**

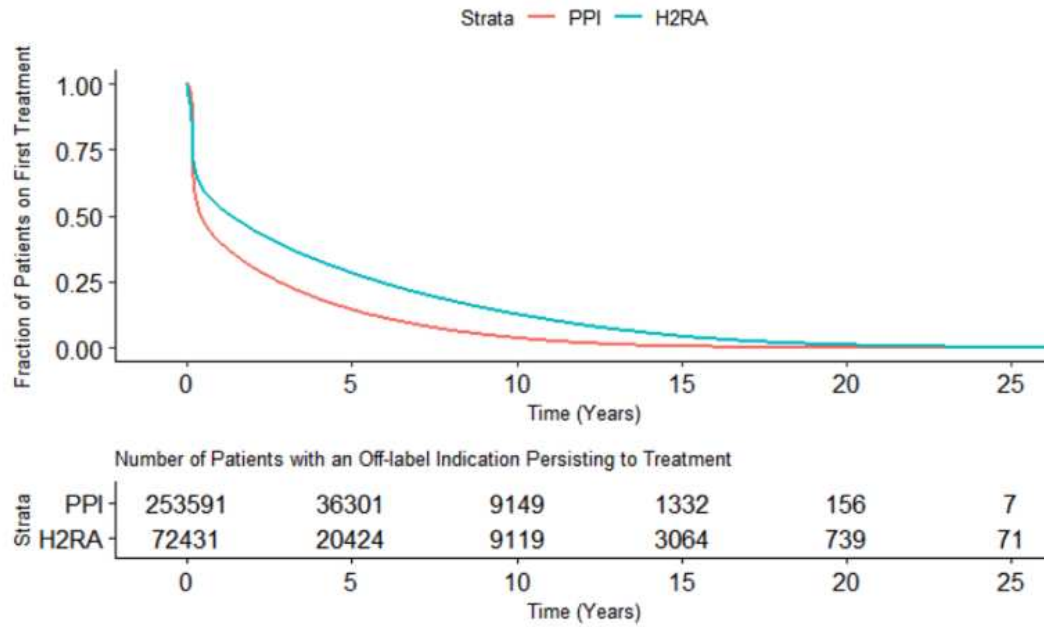

**Supplementary Figure 10. Persistence to Original Treatment Course for Proton Pump Inhibitor and Histamine-2 Receptor Antagonist Initiators with No Recorded Indication for Use**

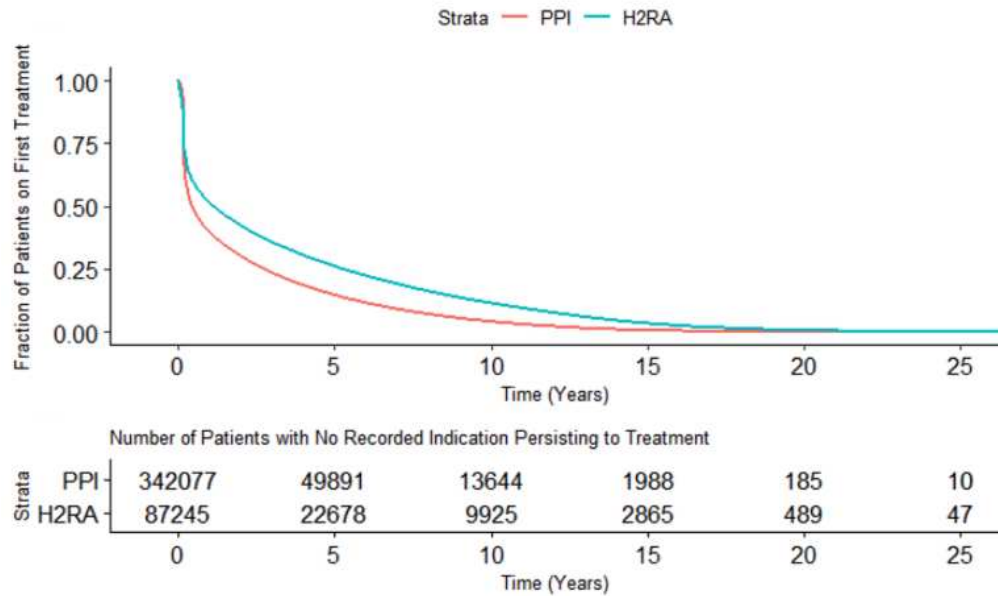

Supplement: bmjopen-2020-041529supp001.pdf [file bmjopen-2020-041529supp001.pdf]
