# Supplementary material for: Trends in acid suppressant drug prescriptions in primary care in the UK: a population-based cross-sectional study
Source: PubMed Central journal article supplement — BMJ Open. 2020 Dec 7;10(12):e041529. doi: 10.1136/bmjopen-2020-041529 (PMC7722810; doi:10.1136/bmjopen-2020-041529), 2020-12-07
Supplement: bmjopen-2020-041529.draft_revisions.pdf [file bmjopen-2020-041529.draft_revisions.pdf]

# BMJ Open

BMJ Open is committed to open peer review. As part of this commitment we make the peer review history of every article we publish publicly available.

When an article is published we post the peer reviewers' comments and the authors' responses online. We also post the versions of the paper that were used during peer review. These are the versions that the peer review comments apply to.

The versions of the paper that follow are the versions that were submitted during the peer review process. They are not the versions of record or the final published versions. They should not be cited or distributed as the published version of this manuscript.

BMJ Open is an open access journal and the full, final, typeset and author-corrected version of record of the manuscript is available on our site with no access controls, subscription charges or pay-per-view fees (<http://bmjopen.bmj.com>).

If you have any questions on BMJ Open's open peer review process please email [info.bmjopen@bmj.com](mailto:info.bmjopen@bmj.com)

# BMJ Open

## Trends in Acid Suppressant Drug Prescriptions in Primary Care in the United Kingdom: A Population Based Cross Sectional Study

|                               |                                                                                                                                                                                                                                                                                                                                                                                                                                                                                                                                   |
|-------------------------------|-----------------------------------------------------------------------------------------------------------------------------------------------------------------------------------------------------------------------------------------------------------------------------------------------------------------------------------------------------------------------------------------------------------------------------------------------------------------------------------------------------------------------------------|
| Journal:                      | <i>BMJ Open</i>                                                                                                                                                                                                                                                                                                                                                                                                                                                                                                                   |
| Manuscript ID                 | bmjopen-2020-041529                                                                                                                                                                                                                                                                                                                                                                                                                                                                                                               |
| Article Type:                 | Original research                                                                                                                                                                                                                                                                                                                                                                                                                                                                                                                 |
| Date Submitted by the Author: | 10-Jun-2020                                                                                                                                                                                                                                                                                                                                                                                                                                                                                                                       |
| Complete List of Authors:     | Abrahami, Devin; Lady Davis Institute for Medical Research, Centre for Clinical Epidemiology; McGill University, Epidemiology, Biostatistics, and Occupational Health<br>McDonald, Emily; McGill University Health Centre, General Internal Medicine; McGill University, Experimental Medicine<br>Schnitzer, Mireille; Université de Montréal, Pharmacy<br>Azoulay, Laurent; Lady Davis Institute for Medical Research, Centre for Clinical Epidemiology; McGill University, Epidemiology, Biostatistics, and Occupational Health |
| Keywords:                     | EPIDEMIOLOGY, Gastroduodenal disease < GASTROENTEROLOGY, PRIMARY CARE                                                                                                                                                                                                                                                                                                                                                                                                                                                             |
|                               |                                                                                                                                                                                                                                                                                                                                                                                                                                                                                                                                   |

SCHOLARONE™  
Manuscripts

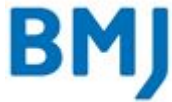

I, the Submitting Author has the right to grant and does grant on behalf of all authors of the Work (as defined in the below author licence), an exclusive licence and/or a non-exclusive licence for contributions from authors who are: i) UK Crown employees; ii) where BMJ has agreed a CC-BY licence shall apply, and/or iii) in accordance with the terms applicable for US Federal Government officers or employees acting as part of their official duties; on a worldwide, perpetual, irrevocable, royalty-free basis to BMJ Publishing Group Ltd ("BMJ") its licensees and where the relevant Journal is co-owned by BMJ to the co-owners of the Journal, to publish the Work in this journal and any other BMJ products and to exploit all rights, as set out in our [licence](#).

The Submitting Author accepts and understands that any supply made under these terms is made by BMJ to the Submitting Author unless you are acting as an employee on behalf of your employer or a postgraduate student of an affiliated institution which is paying any applicable article publishing charge ("APC") for Open Access articles. Where the Submitting Author wishes to make the Work available on an Open Access basis (and intends to pay the relevant APC), the terms of reuse of such Open Access shall be governed by a Creative Commons licence – details of these licences and which [Creative Commons](#) licence will apply to this Work are set out in our licence referred to above.

Other than as permitted in any relevant BMJ Author's Self Archiving Policies, I confirm this Work has not been accepted for publication elsewhere, is not being considered for publication elsewhere and does not duplicate material already published. I confirm all authors consent to publication of this Work and authorise the granting of this licence.

# Trends in Acid Suppressant Drug Prescriptions in Primary Care in the United Kingdom: A Population Based Cross Sectional Study

Devin Abrahami<sup>1,2</sup>, Emily G. McDonald<sup>3,4</sup>, Mireille Schnitzer<sup>5</sup>, Laurent Azoulay<sup>1,2,6</sup>

<sup>1</sup> Centre for Clinical Epidemiology, Lady Davis Institute, Jewish General Hospital, Montreal, Canada

<sup>2</sup> Department of Epidemiology, Biostatistics, and Occupational Health, McGill University, Montreal, Canada

<sup>3</sup> Division of General Internal Medicine, Department of Medicine, McGill University Health Centre

<sup>4</sup> Division of Experimental Medicine, McGill University, Montreal Canada

<sup>5</sup> Faculty of Pharmacy, Université de Montréal, Montréal, Québec, Canada

<sup>6</sup> Gerald Bronfman Department of Oncology, McGill University, Montreal, Canada

**Abstract Word Count:** 252

**Word count:** 3083

## Address for correspondence:

Dr Laurent Azoulay

Centre for Clinical Epidemiology, Lady Davis Institute, Jewish General Hospital

3755 Cote Sainte-Catherine Road, H425.1

Montreal, Quebec, Canada H3T 1E2

Telephone: (514) 340-8222 Ext. 28396

Fax: (514) 340-7564

Email: laurent.azoulay@mcgill.ca

June 10, 2020

## ABSTRACT

**Objective:** To examine proton pump inhibitors (PPI) and histamine-2 receptor antagonists (H2RA) prescribing patterns over a 30-year period by quantifying annual prevalence and prescribing intensity over time.

**Design:** Population based cross sectional study.

**Setting:** More than 700 general practices contributing data to the United Kingdom Clinical Practice Research Datalink.

**Participants:** Within a cohort of 14,242,329 patients registered in the Clinical Practice Research Datalink, 3,027,383 patients were prescribed at least one PPI or H2RA from January 1, 1990 to December 31, 2018.

**Primary and Secondary Outcome Measures:** Annual prescription rates were estimated by dividing the number of patients prescribed a PPI or H2RA by the total Clinical Practice Research Datalink population. Change in prescribing intensity (number of prescriptions per year divided by person-years of follow-up) was calculated using negative binomial regression.

**Results:** From 1990 to 2018, 21.3% of the CPRD population was exposed to at least one acid suppressant drug. During that period, PPI prevalence increased from 0.2-14.2%, while H2RA prevalence remained low (range: 1.2-3.4%). PPI prescribing intensity increased by 16% per year from 1990-1999 and remained unchanged for the remainder of the study period. H2RA prescribing intensity initially decreased from 1990 to 2009 but increased by 5% per year from 2010-2018.

**Conclusions:** While PPI prevalence has been increasing over time, its prescribing intensity has begun to level off. Notwithstanding their efficacy, PPIs are associated with a number of adverse

1  
2  
3 effects not attributed to H2RAs, whose prescribing intensity has recently increased. Thus, H2RAs  
4 remain a valuable treatment option for individuals with gastric conditions.  
5  
6  
7  
8  
9

## 10 **STRENGTHS AND LIMITATIONS OF THIS STUDY**

- 11 - Largest and most comprehensive study to date describing trends of acid suppressant drugs  
12 over a 30-year period  
13
- 14 - Large sample size allows detailed description of trends by age group, sex and indication  
15
- 16 - Prescriptions in the Clinical Practice Research Datalink are issued by general practitioners,  
17 so it was not possible to assess patient adherence  
18
- 19 - We did not have data on prescriptions recorded in hospital, by specialists, or from over the  
20 counter  
21  
22  
23  
24  
25  
26  
27  
28  
29

30 **Funding Statement:** This study was funded by a Foundation Scheme Grant from the Canadian  
31 Institutes of Health Research (FDN-143328). The sponsor had no influence on design and conduct  
32 of the study; collection, management, analysis, and interpretation of the data; and preparation,  
33 review, or approval of the manuscript. DA is the recipient of a Vanier Canada Graduate  
34 Scholarship from the Canadian Institutes of Health Research. EGM receives Salary support from  
35 the Fonds de Recherche du Québec – Santé. MS holds a New Investigator Salary Award from the  
36 Canadian Institutes of Health Research and is the recipient of the Canadian Institutes of Health  
37 Research Canada Research Chair, tier 2. LA holds a Chercheur-Boursier Senior award from the  
38 Fonds de Recherche du Québec – Santé and is the recipient of a William Dawson Scholar Award  
39 from McGill University.  
40  
41  
42  
43  
44  
45  
46  
47  
48  
49  
50  
51  
52  
53  
54  
55  
56  
57  
58  
59  
60

1  
2  
3 **Competing Interests Statement:** The authors have no conflicts of interest to disclose.  
4  
5  
6  
7

8 **Author Contributions:** All authors conceived and designed the study. LA acquired the data. DA  
9  
10 and LA did the statistical analyses. All authors analysed and interpreted the data. DA wrote the  
11  
12 manuscript and all authors critically revised the manuscript. LA supervised the study and is the  
13  
14 guarantor. All authors approved the final version of the manuscript and agree to be accountable  
15  
16 for the accuracy of the work.  
17  
18  
19  
20

21 **Data Sharing:** No additional data available.  
22  
23  
24  
25  
26  
27  
28  
29  
30  
31  
32  
33  
34  
35  
36  
37  
38  
39  
40  
41  
42  
43  
44  
45  
46  
47  
48  
49  
50  
51  
52  
53  
54  
55  
56  
57  
58  
59  
60

## INTRODUCTION

Proton pump inhibitors (PPIs) and histamine 2 receptor antagonists (H2RAs) are acid suppressant drugs used in the management of gastric conditions, including peptic ulcer disease and gastro-oesophageal reflux disease.<sup>1 2</sup> While both drug classes have been used for over three decades, PPIs have been shown to have superior efficacy in reducing stomach acid compared to H2RAs.<sup>1</sup> Nonetheless, both drug classes are among the top 25 most prescribed medications in the hospital setting in the United Kingdom (UK).<sup>3</sup>

In recent years, there have been concerns about the increasing uptake of PPIs, with emerging evidence that they are being prescribed to individuals without an evidence-based indication or for longer durations than necessary.<sup>4-8</sup> Indeed, the number of individuals using PPIs has been increasing significantly since their introduction in 1988.<sup>9</sup> In England alone, more than 50 million PPI prescriptions were dispensed in 2015.<sup>10</sup> In contrast, there is limited information on the older drug class, H2RAs, with regards to their prescribing patterns in recent years. It is also less well known whether H2RAs are also being overprescribed in a similar fashion to PPIs.

While PPIs are generally well tolerated and perceived to have an excellent safety profile,<sup>1</sup> recent evidence suggests that long-term use, beyond the recommended 4-8 week duration for most conditions, may be associated with adverse health outcomes. These include enteric infections such as *Clostridium difficile*, osteoporotic fractures, acute interstitial nephritis, dementia, pneumonia, gastric cancer, and more recently, increased intestinal colonization with multidrug resistant organisms.<sup>10-16</sup> Given their widespread use and these potential adverse effects, the National Institute for Health and Care Excellence (NICE) recommended new treatment guidelines for PPI use in primary care in 2014.<sup>17</sup> These new guidelines emphasize an annual review to determine ongoing need, and to use the lowest dose of PPI on an as-needed basis for symptom



1  
2  
3 relief.<sup>17</sup> Prescribing patterns of PPI usage have not been evaluated since the publication of these  
4  
5 guidelines, and it remains unknown if the guidelines had an impact on the uptake of H2RAs. Thus,  
6  
7 the objective of this utilization study was to determine the prescribing patterns of PPIs and H2RAs  
8  
9 in UK primary care over a 30-year period.  
10  
11  
12  
13  
14  
15  
16  
17  
18  
19  
20  
21  
22  
23  
24  
25  
26  
27  
28  
29  
30  
31  
32  
33  
34  
35  
36  
37  
38  
39  
40  
41  
42  
43  
44  
45  
46  
47  
48  
49  
50  
51  
52  
53  
54  
55  
56  
57  
58  
59  
60

For peer review only

## METHODS

### *Data Source*

This study was conducted using the Clinical Practice Research Datalink (CPRD), a large primary care database with records of over 15 million patients, shown to be well representative of the general UK population.<sup>18 19</sup> The CPRD contains information on demographics, diagnoses, procedures,<sup>20</sup> and prescription information based on the British National Formulary. The data are audited regularly, and diagnoses recorded in the CPRD have been extensively validated.<sup>21 22</sup>

The study protocol was approved by the Independent Scientific Advisory Committee of the CPRD (protocol number 19\_119RA) and by the Research Ethics Board of the Jewish General Hospital. All authors had access to the study data and reviewed and approved the final manuscript.

### *Study Population*

Using the CPRD, we identified a cohort of patients who were registered with a general practitioner from January 1, 1990 to December 31, 2018. We did not impose any age restrictions to evaluate PPI and H2RA prescribing trends in both paediatric and adult populations. Patients were followed from the latest date at which their practice started contributing data to the CPRD, their personal date of registration with their general practice, or the start of the study period (January 1, 1990). Follow-up ended at the earliest date at which their practice stopped contributing data to the CPRD, their personal end of registration with their general practice, or the end of the study period (December 31, 2018).

### *Exposure Definition*

We identified all PPIs and H2RAs prescriptions within the study period using the British National Formulary (**Supplementary Tables 1 and 2**). This included five PPI types (omeprazole, esomeprazole, lansoprazole, pantoprazole and rabeprazole) and four H2RA types (ranitidine, cimetidine, famotidine, and nizatidine). Prescription duration was calculated using the number of days' supply recorded in the CPRD. If this value was not recorded, we divided the prescription quantity by the numeric daily dose to ascertain duration. If none of these variables were recorded, we used the mode of the prescription duration.

### *Statistical Analysis*

#### *Prevalence*

For each calendar year, we calculated the prevalence of PPIs and H2RAs, separately. The numerator for these prescription rates was the number of individuals receiving either at least one acid suppressant drug in a given year (PPI and H2RA prescriptions were considered separately). The denominator was the total number of patients registered in the CPRD in a given year. Thus, prevalence was calculated per year by dividing the number of prescriptions over the number of patients in the CPRD for each calendar year between 1990 and 2018.

Secondary analyses were conducted to determine prevalence among certain subgroups. Specifically, the rates were stratified by age ( $\leq 18$ , 19-39, 40-59,  $\geq 60$ ), sex, and individual drug type.

Prevalence was also calculated among new users only by restricting the population to individuals receiving their first acid suppressant prescription within the study period. To determine new use, individuals prescribed acid suppressants were required to have at least one year of

1  
2  
3 medical history in the CPRD prior to their first prescription. Similarly, patients in the CPRD were  
4 required to have at least one year of follow-up to contribute to the denominator. Individuals co-  
5 prescribed a PPI and H2RA as their first prescription were excluded from this analysis. Thus,  
6 prevalence was calculated for each year between 1991 and 2018 in new users and stratified  
7 according to the same variables described above.  
8  
9  
10  
11  
12  
13

### 14 15 16 17 *Indications for use*

18  
19 Indications for use among new users was inferred using Read codes recorded at any time  
20 prior to the first prescription. Indications were classified as evidence-based (dyspepsia,  
21 gastroprotection, gastroesophageal reflux disease, peptic ulcer disease, Helicobacter pylori  
22 infection, Barrett's oesophagus, and Zollinger-Ellison syndrome), off-label (stomach pain and  
23 gastritis or duodenitis), non-evidence based gastroprotection, and no recorded indication.<sup>2</sup> To  
24 define individuals using acid suppressant drugs for gastroprotection, we considered individuals  
25 prescribed NSAIDs or dual antiplatelet therapy within 90 days prior to their first PPI or H2RA  
26 prescription. To be classified as evidence-based gastroprotection, these patients additionally  
27 required at least one of the following risk factors (age  $\geq 60$ , history of bleed or ulcer, or concomitant  
28 use of anticoagulants, antiplatelets, corticosteroids).<sup>2</sup> All individuals with a co-prescription for  
29 NSAIDs or dual antiplatelet therapy, but without a risk factor, were assumed to be using acid  
30 suppressants for non-evidence based gastroprotection.  
31  
32  
33  
34  
35  
36  
37  
38  
39  
40  
41  
42  
43  
44  
45  
46  
47  
48

### 49 *Prescribing Intensity*

50  
51 For each calendar year, we calculated the prescribing intensity of PPI and H2RA use,  
52 separately. The numerator for these rates was the number of prescriptions received for either acid  
53  
54  
55

1  
2  
3 suppressant drug in a given year (prescriptions longer than 30 days were converted into 30-day  
4  
5 equivalents [e.g. one 90-day prescription was equivalent to three 30-day prescriptions], for a  
6  
7 maximum of 12 prescriptions per year). The denominator for these rates was the total person-years  
8  
9 of follow-up that were contributed by drug users in a given year. Thus, yearly prescribing incidence  
10  
11 rates based were calculated by dividing the number of prescriptions over the person-years of  
12  
13 follow-up for each year between 1990 and 2018. To determine whether prescribing intensity of  
14  
15 use changed during the study period, we stratified the study period by decade (1990-1999, 2000-  
16  
17 2009 and 2010-2018) and estimated incident rate ratios (IRRs) with 95% CIs using negative  
18  
19 binomial regression, with log of follow-up time included as an offset variable.  
20  
21  
22  
23  
24  
25

### 26 *Persistence*

27  
28 As there is some evidence that PPIs are being used for inappropriate durations,<sup>4-8</sup> but there  
29  
30 is limited evidence on H2RA use, we examined persistence to both drugs by calculating the  
31  
32 cumulative incidence of discontinuation in new users of PPIs and H2RAs. Time to discontinuation  
33  
34 was defined as the time from the first prescription of an acid suppressant drug to the end of the  
35  
36 first treatment episode. Exposure was considered continuous if the duration of one prescription  
37  
38 overlapped with the start of the subsequent prescription, allowing for a 30-day grace period. The  
39  
40 length of this grace period was changed to 7 and 60 days in a sensitivity analysis. We used Kaplan-  
41  
42 Meier curves to graphically describe the cumulative incidence of discontinuation of PPIs and  
43  
44 H2RAs, separately, as a function of duration of use to show the cumulative probability of persisting  
45  
46 to the first treatment episode as a function of follow-up time. All analyses described above were  
47  
48 conducted with SAS version 9.4 (SAS institute, Cary, NC) and R (R Foundation for Statistical  
49  
50 Computing, Vienna, Austria).  
51  
52  
53  
54  
55

1  
2  
3 *Patient Involvement*  
4

5 We did not include patients as study participants, as our study involved the use of secondary  
6 data. Patients were not involved in the design or implementation of the study. We do not plan to  
7 involve patients in the dissemination of results, nor will we disseminate results directly to patients.  
8  
9  
10  
11  
12  
13  
14  
15  
16  
17  
18  
19  
20  
21  
22  
23  
24  
25  
26  
27  
28  
29  
30  
31  
32  
33  
34  
35  
36  
37  
38  
39  
40  
41  
42  
43  
44  
45  
46  
47  
48  
49  
50  
51  
52  
53  
54  
55  
56  
57  
58  
59  
60

For peer review only

## RESULTS

Within a cohort of 14,242,329 patients registered in the CPRD, 3,027,383 (21.3%) patients were prescribed at least one PPI or H2RA during the study period, corresponding to 58,926,373 and 9,386,908 prescriptions, respectively. Among patients prescribed an acid suppressant drug, there were 1,654,323 (54.7%) females and 2,920,176 (96.5%) adults (at least 18 years old). Throughout follow-up, there were 2,714,785 (19.1%) individuals prescribed at least one PPI, 855,248 (6.0%) individuals prescribed at least one H2RA, and 542,650 (3.8%) individuals prescribed both drug classes.

Among patients newly-prescribed an acid suppressant drug, 81.5% (n=1,699,837) were initially prescribed a PPI, while 18.5% (n=385,988) were initially prescribed a H2RA. **Table 1** presents the characteristics of these users at the time of their first prescription. At baseline, PPI users were slightly older than H2RA users, but there were no sex differences between the two groups. Only 48.4% and 54.1% of PPI and H2RA users, respectively, had an evidence-based indication for use, with dyspepsia being the most common recorded indication. Non-evidence based gastroprotection was more common in PPI users (19.4%) than the H2RA users (12.8%). About 18% of PPI and H2RA users did not have a recorded indication for use.

**Figures 1 to 3** illustrate the overall, and sex and age-stratified prevalence of PPI and H2RA, respectively. Throughout follow-up, PPI prevalence sharply increased from 0.2% in 1990 to 14.2% in 2018. In contrast, the prevalence of H2RAs remained consistently low throughout the study period (range: 1.2 to 3.4%). PPIs and H2RAs were more commonly prescribed in adults at least 60 years old and in females. Patterns of use were similar among new users (**Supplementary Figures 1 and 2**), except for an increase in use of H2RAs among the paediatric population over the past decade (**Supplementary Figure 3**). Omeprazole was the most commonly prescribed PPI

1  
2  
3 during the study period, followed by lansoprazole (**Supplementary Figure 4**). At the beginning  
4 of the study period, ranitidine and cimetidine were both frequently prescribed, though after 2004  
5 ranitidine was almost exclusively the only H2RA prescribed (**Supplementary Figure 4**).  
6  
7  
8  
9

10 Throughout the study period, the prescribing intensity of PPIs ranged from 0.68 per 1,000  
11 person-years in 1990, increasing to a peak intensity of 9.78 per 1,000 person-years in 2012  
12 (**Supplementary Figure 5**). In contrast, the prescribing intensity of H2RA use decreased over the  
13 study period from the highest intensity of 19.45 per 1,000 person-years in 1990, to the lowest  
14 intensity of 0.78 per 1,000 person-years in 2013. From 1990 to 1999, the prescribing intensity of  
15 PPI use increased yearly by 16% (IRR: 1.16, 95% CI: (1.16 to 1.16)), while the intensity of use  
16 remained constant from 2000 to 2009 (IRR: 1.01, 95% CI: 1.01 to 1.01) and 2010 to 2018 (IRR:  
17 0.98, 95% CI: 0.98 to 0.98). In contrast, prescribing intensity of H2RAs decreased by 11% per  
18 year from 1990 to 1999 (IRR: 0.89, 95% CI: 0.89 to 0.90), 10% a year from 2000 to 2009 (IRR:  
19 0.90, 95% CI: 0.90 to 0.90), but increased by 5% a year from 2010 to 2018 (IRR: 1.05, 95% CI:  
20 1.05 to 1.05).  
21  
22  
23  
24  
25  
26  
27  
28  
29  
30  
31  
32  
33  
34

35 Within new users of PPIs (n=1,699,837) the median duration of the first treatment course  
36 was 144 days (interquartile range [IQR]: 59 to 870). Reasons for discontinuation are presented in  
37 **Table 1**, which illustrates that the majority of PPI users (52.5%) discontinued their first treatment  
38 course due to a gap of at least 30 days between prescriptions. Overall, a small percentage (2.1%)  
39 of PPI users discontinued their original treatment due to a switch to H2RAs. In contrast, the median  
40 duration of the first H2RA treatment course among new H2RA users (n=385,988) was 279 days  
41 (IQR: 61 to 1,645). H2RA users were equally likely to discontinue use due to a treatment gap  
42 exceeding 30 days, administrative censoring, or because of a switch to a PPI. **Supplementary**  
43 **Table 3** presents duration of treatment and reasons for discontinuation under alternate grace  
44  
45  
46  
47  
48  
49  
50  
51  
52  
53  
54  
55



1  
2  
3 periods. **Figure 4** illustrates the time to discontinuation of both drug classes. While persistence to  
4  
5 PPIs and H2RAs rapidly declined within the first year of use, 37.5% of PPI users and 46.9% of  
6  
7 H2RA users persisted to their original treatment course beyond the one-year recommended  
8  
9 duration.<sup>17</sup> Though persistence to the original treatment course decreased for both study drugs with  
10  
11 time, 12.6% of PPI users and 23.1% of H2RA users persisted to their original treatment course  
12  
13 after 5 years.  
14  
15  
16  
17  
18  
19  
20  
21  
22  
23  
24  
25  
26  
27  
28  
29  
30  
31  
32  
33  
34  
35  
36  
37  
38  
39  
40  
41  
42  
43  
44  
45  
46  
47  
48  
49  
50  
51  
52  
53  
54  
55  
56  
57  
58  
59  
60

For peer review only

## DISCUSSION

To our knowledge, this is the largest and most comprehensive study conducted to examine the prescribing patterns of both PPIs and H2RAs in the UK. Throughout the study period, 21.3% of the CPRD population received at least one acid suppressant drug. The overall prevalence of PPI prescribing has increased from 1990 to 2018, while the prevalence of H2RA remained low. Prescribing intensity to PPIs increased within the first decade of follow-up but remained consistent for the remainder of the study period. In contrast, H2RA prescribing intensity decreased from 1990 to 2009, but has begun to increase over the past 10 years.

The overall high prevalence of PPI use in the UK is consistent with a utilization study using CPRD data, but whose follow-up period ended at end of 2014.<sup>9</sup> Importantly, our study further contextualizes the landscape of prescribing acid suppressant drugs by describing trends of H2RA use. While H2RAs are considerably less popular than PPIs, we observed almost 10 million prescriptions within our study period, suggesting that their use has not been completely supplanted by PPIs. While use of H2RAs may be associated with delirium and acute interstitial nephritis,<sup>23 24</sup> they are generally well tolerated compared to PPIs, and are more commonly associated with mild adverse effects like headache and constipation,<sup>23</sup> not the serious adverse effects associated with use of PPIs.<sup>10-16</sup> Thus, H2RAs continue to represent an important treatment option for individuals with gastric conditions. Finally, to our knowledge, this is the first study to describe contemporary prescribing practices following the most recent NICE recommendations in 2014.<sup>17</sup> Given that H2RA prescribing intensity has been increasing from 2010 to 2018, this may suggest a gradual shift in prescribing to favour H2RAs following the guidelines. Future studies should investigate the impact of the NICE recommendations more thoroughly.

1  
2  
3 Our study demonstrated a sex and age difference among PPI and H2RA prescribing  
4 patterns, whereby women and adults at least 60 years old were more frequently prescribed both  
5 drug classes. As women are more likely to report symptoms of gastric reflux than men,<sup>25</sup> this would  
6 lead to more frequent prescribing of acid suppressants to manage these symptoms. Given that the  
7 incidence of dyspepsia, the most common indication for PPIs and H2RAs, increases with age,<sup>26</sup>  
8 the patterns we observed with age were expected. Additionally, patients over the age of 60 who  
9 are prescribed NSAIDs or dual antiplatelet therapy may be prescribed an acid suppressant drug for  
10 gastroprotection,<sup>2</sup> which may contribute to the increased prescribing trends among older adults.  
11  
12  
13  
14  
15  
16  
17  
18  
19  
20  
21

22 In recent years, there have been concerns about the increasing inappropriate use of PPIs.<sup>4</sup>  
23  
24 <sup>5</sup> Indeed, between 40% and 55% of primary care patients in the United States and the UK do not  
25 have an evidence-based indication for long-term PPI use.<sup>27 28</sup> This is particularly relevant as  
26 evidence continues to emerge that PPIs are associated with a number of serious adverse events.<sup>10-</sup>  
27  
28 <sup>16</sup> Our study adds to the growing literature surrounding inappropriate use, as we illustrated that  
29 these issues extend to H2RA users as well. Indeed, close to 20% of PPI and H2RA users have no  
30 recorded indication for use, while 37.5% and 46.9%, respectively, remain on their original  
31 treatment course at one year of follow-up, despite recommendations to limit use to 4-8 weeks at a  
32 time for symptomatic treatment of GERD and PUD.<sup>17</sup> While some of this high persistence may be  
33 explained by ongoing use for gastroprotection, a significant portion likely represents overtreatment  
34 and failure to re-evaluate for ongoing necessity.  
35  
36  
37  
38  
39  
40  
41  
42  
43  
44  
45  
46

47 This study has several strengths. To our knowledge, this is the largest and most  
48 comprehensive study to date describing the trends of acid suppressant drugs over time. Our study  
49 describes the use of PPIs and H2RAs over a 30-year period, which is the entirety of PPI market  
50 availability. Importantly, we provide new data on the recent use of H2RAs, which indicates that  
51  
52  
53  
54  
55  
56  
57  
58  
59  
60

1  
2  
3 this drug class is gaining favour among general practitioners. Second, the data we used in this  
4  
5 study has been well validated,<sup>21 22</sup> and shown to be representative of the UK general population.<sup>18</sup>

6  
7  
8 <sup>19</sup> Finally, the large sample size allowed us to provide detailed information of trends by age group  
9  
10 and sex, and investigate use among rare indications, including Barrett's oesophagus and Zollinger-  
11  
12 Ellison syndrome.

13  
14  
15 This study also has some limitations. Prescriptions recorded in the CPRD are those issued  
16  
17 by general practitioners, and thus it is not possible to assess patient adherence. While this may  
18  
19 slightly affect the estimate of cumulative incidence of discontinuation, the rest of our analyses  
20  
21 focus on physician prescribing trends, which would not be influenced by adherence. Second, it is  
22  
23 possible that the trends reported in this study are underestimated, as we do not have information  
24  
25 on prescriptions recorded in hospital or by specialists. However, this is unlikely to lead to  
26  
27 substantial underestimation, as general practitioners in the UK are responsible for long-term  
28  
29 patient care.<sup>29</sup> Third, this study uses data from the UK only, and as such, it is possible that  
30  
31 prescribing trends will differ in alternate settings. Finally, this study did not include data pertaining  
32  
33 to over the counter use of PPIs and H2RAs. Thus, the relatively high prevalence of patients  
34  
35 exposed to acid suppressant drugs (21.3%) would be even higher if over the counter usage was  
36  
37 considered.  
38  
39  
40  
41

42 This study demonstrates that while prevalence of PPI use has increased with time, its  
43  
44 prescribing intensity has plateaued in recent years. In contrast, while prevalence of H2RAs was  
45  
46 consistently low, its prescribing intensity has increased over the last decade. Given that PPIs are  
47  
48 associated with a number of adverse effects, most of which are not attributed to H2RAs, H2RAs  
49  
50 remain a valuable treatment option for individuals with gastric conditions.  
51  
52  
53  
54  
55  
56  
57  
58  
59  
60

**REFERENCES**

1. Strand DS, Kim D, Peura DA. 25 Years of Proton Pump Inhibitors: A Comprehensive Review. *Gut and liver* 2017;11(1):27-37. doi: 10.5009/gnl15502 [published Online First: 11/14]
2. Benmassaoud A, McDonald EG, Lee TC. Potential harms of proton pump inhibitor therapy: rare adverse effects of commonly used drugs. 2016;188(9):657-62. doi: 10.1503/cmaj.150570 %J Canadian Medical Association Journal
3. Audi S, Burrage DR, Lonsdale DO, et al. The 'top 100' drugs and classes in England: an updated 'starter formulary' for trainee prescribers. *British journal of clinical pharmacology* 2018;84(11):2562-71. doi: 10.1111/bcp.13709
4. Walsh K, Kwan D, Marr P, et al. Deprescribing in a family health team: a study of chronic proton pump inhibitor use. *Journal of primary health care* 2016;8(2):164-71. doi: 10.1071/hc15946 [published Online First: 2016/08/02]
5. Katz MH. Failing the acid test: Benefits of proton pump inhibitors may not justify the risks for many users. *Archives of Internal Medicine* 2010;170(9):747-48. doi: 10.1001/archinternmed.2010.64
6. Prescribing PPIs. *Drug and Therapeutics Bulletin* 2017;55(10), 11(55(10), 117)
7. Farrell B, Pottie K, Thompson W, et al. Deprescribing proton pump inhibitors: Evidence-based clinical practice guideline. *Can Fam Physician* 2017;63(5):354-64. [published Online First: 2017/05/14]
8. Forgacs I, Loganayagam A. Overprescribing proton pump inhibitors. *BMJ (Clinical research ed)* 2008;336(7634):2-3. doi: 10.1136/bmj.39406.449456.BE

- 1  
2  
3 9. Othman F, Card TR, Crooks CJ. Proton pump inhibitor prescribing patterns in the UK: a  
4  
5 primary care database study. *Pharmacoepidemiol Drug Saf* 2016;25(9):1079-87. doi:  
6  
7 10.1002/pds.4043 [published Online First: 2016/06/04]  
8  
9
- 10 10. The Development and Safety of Proton Pump Inhibitors. *The Pharmaceutical Journal*  
11  
12 2016;296(7890)  
13
- 14 11. Nehra AK, Alexander JA, Loftus CG, et al. Proton Pump Inhibitors: Review of Emerging  
15  
16 Concerns. *Mayo Clinic Proceedings* 2018;93(2):240-46. doi:  
17  
18 10.1016/j.mayocp.2017.10.022  
19  
20
- 21 12. Wan Q-Y, Wu X-T, Li N, et al. Long-term proton pump inhibitors use and risk of gastric  
22  
23 cancer: a meta-analysis of 926 386 participants. *Gut* 2018;gutjnl-2018-316416. doi:  
24  
25 10.1136/gutjnl-2018-316416  
26  
27
- 28 13. Yang Y, George KC, Shang W-F, et al. Proton-pump inhibitors use, and risk of acute kidney  
29  
30 injury: a meta-analysis of observational studies. *Drug design, development and therapy*  
31  
32 2017;11:1291-99. doi: 10.2147/DDDT.S130568  
33  
34
- 35 14. Zhou B, Huang Y, Li H, et al. Proton-pump inhibitors and risk of fractures: an update meta-  
36  
37 analysis. *Osteoporosis international : a journal established as result of cooperation*  
38  
39 *between the European Foundation for Osteoporosis and the National Osteoporosis*  
40  
41 *Foundation of the USA* 2016;27(1):339-47. doi: 10.1007/s00198-015-3365-x [published  
42  
43 Online First: 2015/10/16]  
44  
45
- 46 15. McDonald EG, Milligan J, Frenette C, et al. Continuous Proton Pump Inhibitor Therapy and  
47  
48 the Associated Risk of Recurrent Clostridium difficile InfectionPPI Therapy and  
49  
50 Recurrent C difficile InfectionPPI Therapy and Recurrent C difficile Infection. *JAMA*  
51  
52  
53  
54  
55  
56  
57  
58  
59  
60

- 1  
2  
3 *Internal Medicine* 2015;175(5):784-91. doi: 10.1001/jamainternmed.2015.42 %J JAMA  
4  
5 Internal Medicine  
6  
7  
8 16. Willems RP, van Dijk K, Ket JC, et al. Evaluation of the association between gastric acid  
9  
10 suppression and risk of intestinal colonization with multidrug-resistant microorganisms: a  
11  
12 systematic review and meta-analysis. *JAMA internal medicine* 2020;180(4):561-71.  
13  
14  
15 17. Gastro-oesophageal reflux disease and dyspepsia in adults: investigation and management  
16  
17 National Institute for Health and Care Excellence 2014 [  
18  
19 18. Herrett E, Gallagher AM, Bhaskaran K, et al. Data Resource Profile: Clinical Practice  
20  
21 Research Datalink (CPRD). *Int J Epidemiol* 2015;44(3):827-36. doi: 10.1093/ije/dyv098  
22  
23 [published Online First: 2015/06/08]  
24  
25  
26 19. Wolf A, Dedman D, Campbell J, et al. Data resource profile: Clinical Practice Research  
27  
28 Datalink (CPRD) Aurum. *International Journal of Epidemiology* 2019 doi:  
29  
30 10.1093/ije/dyz034  
31  
32  
33 20. Read codes. United Kingdom National Health Service  
34  
35  
36 2010 [Available from: <https://www.nlm.nih.gov/research/umls/sourcereleasedocs/current/RCD/>  
37  
38 accessed 2017.  
39  
40  
41 21. Jick SS, Kaye JA, Vasilakis-Scaramozza C, et al. Validity of the general practice research  
42  
43 database. *Pharmacotherapy* 2003;23(5):686-9. [published Online First: 2003/05/14]  
44  
45  
46 22. Lawrenson R, Williams T, Farmer R. Clinical information for research; the use of general  
47  
48 practice databases. *J Public Health Med* 1999;21(3):299-304. [published Online First:  
49  
50 1999/10/21]  
51  
52 23. Nugent CC, Terrell JM. H2 Blockers. StatPearls [Internet]: StatPearls Publishing 2019.  
53  
54  
55  
56  
57  
58  
59  
60

- 1  
2  
3 24. Fisher AA, Le Couteur DG. Nephrotoxicity and hepatotoxicity of histamine H2 receptor  
4 antagonists. *Drug Saf* 2001;24(1):39-57. doi: 10.2165/00002018-200124010-00004  
5  
6 [published Online First: 2001/02/24]  
7  
8  
9  
10 25. Kim YS, Kim N, Kim GH. Sex and gender differences in gastroesophageal reflux disease.  
11  
12 *Journal of neurogastroenterology and motility* 2016;22(4):575.  
13  
14  
15 26. Piessevaux H, De Winter B, Louis E, et al. Dyspeptic symptoms in the general population: a  
16  
17 factor and cluster analysis of symptom groupings. *Neurogastroenterol Motil*  
18  
19 2009;21(4):378-88. doi: 10.1111/j.1365-2982.2009.01262.x [published Online First:  
20  
21 02/12]  
22  
23  
24 27. Heidelbaugh JJ, Goldberg KL, Inadomi JM. Magnitude and economic effect of overuse of  
25  
26 antisecretory therapy in the ambulatory care setting. *The American journal of managed*  
27  
28 *care* 2010;16(9):e228-34.  
29  
30  
31 28. Batuwitage BT, Kingham JG, Morgan NE, et al. Inappropriate prescribing of proton pump  
32  
33 inhibitors in primary care. *Postgraduate Medical Journal* 2007;83(975):66-68.  
34  
35  
36 29. Ahrens D, Behrens G, Himmel W, et al. Appropriateness of proton pump inhibitor  
37  
38 recommendations at hospital discharge and continuation in primary care. *International*  
39  
40 *journal of clinical practice* 2012;66(8):767-73. doi: 10.1111/j.1742-1241.2012.02973.x  
41  
42 [published Online First: 2012/07/19]  
43  
44  
45  
46  
47  
48  
49  
50  
51  
52  
53  
54  
55  
56  
57  
58  
59  
60



**Table 1. Characteristics of Individuals Newly Prescribed Proton Pump Inhibitors and Histamine-2 Receptor Antagonists**

| Characteristic                      | Proton Pump Inhibitors † | Histamine-2 Receptor Antagonists ‡ |
|-------------------------------------|--------------------------|------------------------------------|
| Total                               | 1,699,837                | 385,988                            |
| Male, n (%)                         | 768,781 (45.2)           | 167,683 (43.4)                     |
| Age, years (mean, SD)               | 53.4 (18.9)              | 48.6 (21.1)                        |
| Age group, n (%)                    |                          |                                    |
| < 18 years                          | 34,590 (2.0)             | 30,057 (7.8)                       |
| 18-39 years                         | 393,052 (23.1)           | 109,205 (28.3)                     |
| 40-59 years                         | 596,469 (35.1)           | 116,174 (30.1)                     |
| ≥60 years                           | 675,726 (39.8)           | 130,552 (33.8)                     |
| Evidence-based indication, n (%)§   |                          |                                    |
| Dyspepsia                           | 400,900 (48.7)           | 134,841 (64.6)                     |
| Gastroprotection                    | 292,781 (35.6)           | 45,776 (21.9)                      |
| Gastroesophageal reflux disease     | 185,557 (22.5)           | 57,604 (27.6)                      |
| Peptic ulcer disease                | 71,945 (8.7)             | 20,150 (9.7)                       |
| Helicobacter pylori infection       | 48,976 (5.9)             | 13,050 (6.3)                       |
| Barrett's oesophagus                | 4,709 (0.57)             | 1,962 (0.94)                       |
| Zollinger-Ellison syndrome          | 27 (0.0033)              | 15 (0.0072)                        |
| Off-label indication, n (%)§        |                          |                                    |
| Stomach pain                        | 214,814 (69.2)           | 51,050 (73.2)                      |
| Gastritis or duodenitis             | 36,138 (11.6)            | 11,726 (16.8)                      |
| Non-evidence based gastroprotection | 330,273 (19.4)           | 49,501 (12.8)                      |
| No recorded indication, n (%)       | 310,592 (18.3)           | 69,741 (18.1)                      |
| Reason for discontinuation ¶        |                          |                                    |
| Switch to other class               | 43,988 (2.6)             | 124,648 (32.3)                     |
| Treatment gap > 30 days             | 893,230 (52.5)           | 122,928 (31.8)                     |
| Administrative Censoring            | 762,619 (44.9)           | 138,412 (35.9)                     |

† 823,393 (48.4%) evidence-based indication, 235,579 (13.9%) off-label indication.

‡ 208,789 (54.1%) evidence-based indication, 57,957 (15.0%) off-label indication.

§ Indication categories are not mutually exclusive.

¶ Median duration of first treatment course for PPI users and H2RA users was 144 and 279 days, respectively.

**FIGURE LEGENDS**

- 1  
2  
3  
4  
5 Figure 1 Overall Prevalence of Proton Pump Inhibitor and Histamine-2 Receptor  
6 Antagonist Use  
7  
8 Figure 2 Sex-stratified Prevalence of Proton Pump Inhibitor and Histamine-2 Receptor  
9 Antagonist Use  
10  
11 Figure 3 Age-stratified Prevalence of A) Proton Pump Inhibitor Use and b) Histamine-2  
12 Receptor Antagonist Use  
13  
14  
15 Figure 4 Persistence to Original Treatment Course for A) Proton Pump Inhibitor Initiators  
16 and B) Histamine-2 Receptor Antagonist Initiators  
17  
18  
19  
20  
21  
22  
23  
24  
25  
26  
27  
28  
29  
30  
31  
32  
33  
34  
35  
36  
37  
38  
39  
40  
41  
42  
43  
44  
45  
46  
47  
48  
49  
50  
51  
52  
53  
54  
55  
56  
57  
58  
59  
60

1  
2  
3  
4  
5  
6  
7  
8  
9  
10  
11  
12  
13  
14  
15  
16  
17  
18  
19  
20  
21  
22  
23  
24  
25  
26  
27  
28  
29  
30  
31  
32  
33  
34  
35  
36  
37  
38  
39  
40  
41  
42  
43  
44  
45  
46  
47  
48  
49  
50  
51  
52  
53  
54  
55  
56  
57  
58  
59  
60

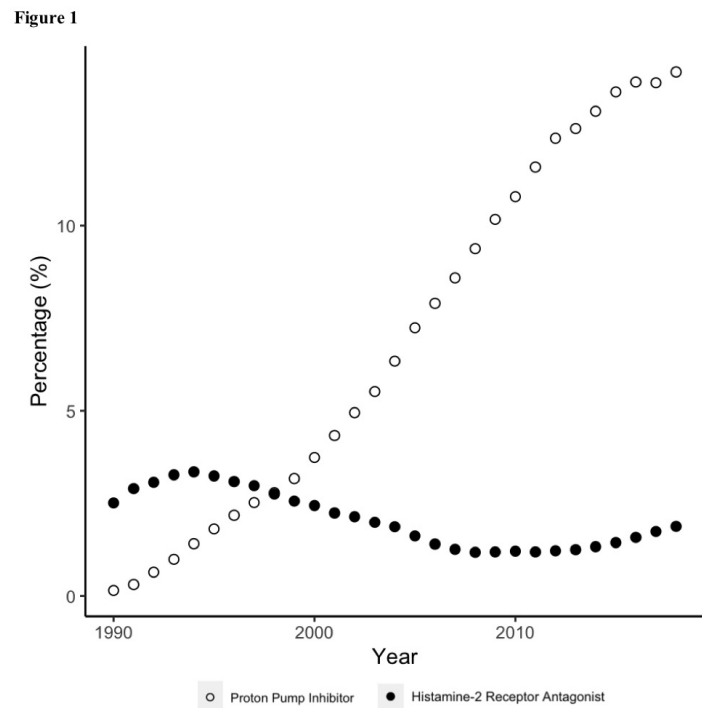

Overall Prevalence of Proton Pump Inhibitor and Histamine-2 Receptor Antagonist Use  
215x279mm (150 x 150 DPI)

Figure 2

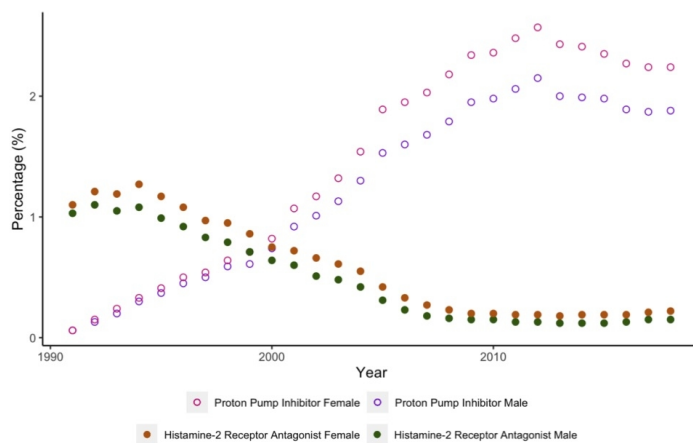

Sex-stratified Prevalence of Proton Pump Inhibitor and Histamine-2 Receptor Antagonist Use

215x279mm (150 x 150 DPI)

1  
2  
3  
4  
5  
6  
7  
8  
9  
10  
11  
12  
13  
14  
15  
16  
17  
18  
19  
20  
21  
22  
23  
24  
25  
26  
27  
28  
29  
30  
31  
32  
33  
34  
35  
36  
37  
38  
39  
40  
41  
42  
43  
44  
45  
46  
47  
48  
49  
50  
51  
52  
53  
54  
55  
56  
57  
58  
59  
60

Figure 3

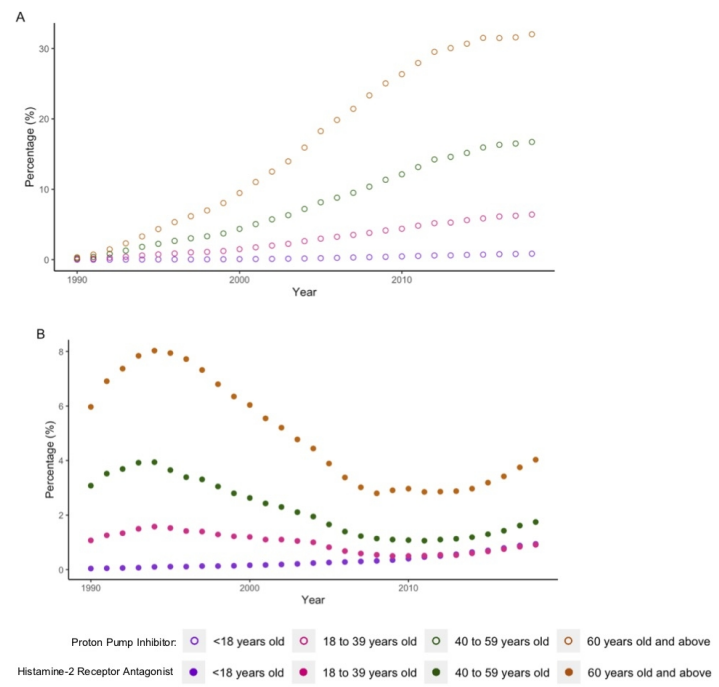

Age-stratified Prevalence of A) Proton Pump Inhibitor Use and b) Histamine-2 Receptor Antagonist Use  
215x279mm (150 x 150 DPI)

Figure 4

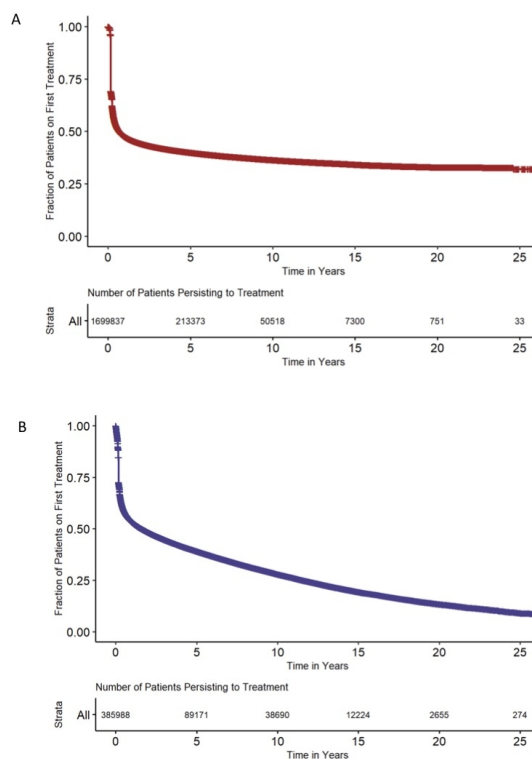

Persistence to Original Treatment Course for A) Proton Pump Inhibitor Initiators and B) Histamine-2 Receptor Antagonist Initiators

215x279mm (150 x 150 DPI)

## Table of Contents

|                                                                                                                                                                           |   |
|---------------------------------------------------------------------------------------------------------------------------------------------------------------------------|---|
| Supplementary Table 1. List of British National Formulary Codes for Proton Pump Inhibitors.....                                                                           | 2 |
| Supplementary Table 2. List of British National Formulary Codes for Histamine-2 Receptor Antagonists.....                                                                 | 3 |
| Supplementary Table 3. Reason for Discontinuation of Initial Acid Suppressant Treatment Course Under Alternate Grace Periods.....                                         | 4 |
| Supplementary Figure 1. Overall Prevalence of Proton Pump Inhibitor and Histamine-2 Receptor Antagonist Use in New Users.....                                             | 5 |
| Supplementary Figure 2. Sex-stratified Prevalence of Proton Pump Inhibitor and Histamine-2 Receptor Antagonist Use in New Users.....                                      | 6 |
| Supplementary Figure 3. Age-stratified Prevalence of A) Proton Pump Inhibitor Use and b) Histamine-2 Receptor Antagonist Use in New Users.....                            | 7 |
| Supplementary Figure 4. Prevalence of A) Proton Pump Inhibitor Prescriptions and B) Histamine-2 Receptor Antagonist Prescriptions Stratified by Individual Drug Type..... | 8 |
| Supplementary Figure 5. Prescribing Intensity of Proton Pump Inhibitors and Histamine-2 Receptor Antagonists.....                                                         | 9 |

---

**Supplementary Table 1. List of British National Formulary Codes for Proton Pump Inhibitors**


---

| British National Formulary Code                           | British National Formulary Header                                                                                                                      |
|-----------------------------------------------------------|--------------------------------------------------------------------------------------------------------------------------------------------------------|
| 01030500/05010103                                         | Proton Pump Inhibitors/Broad-spectrum Penicillins                                                                                                      |
| 01030500/10010100                                         | Proton Pump Inhibitors/Non-steroidal Anti-inflammatory Drugs                                                                                           |
| 01030500/05010500                                         | Proton Pump Inhibitors/Macrolides                                                                                                                      |
| 01030800/05011100/05040200/<br>05040300/05040400/07020251 | Helicobacter Pylori Eradication/Metronidazole And Tinidazole/Amoebicides/Trichomonacides/ Antigiardial Drugs/Preparations For Other Vaginal Infections |
| 1030500                                                   | Proton Pump Inhibitors                                                                                                                                 |

---



---

**Supplementary Table 2. List of British National Formulary Codes for Histamine-2 Receptor Antagonists**

---

| <b>British National Formulary Code</b> | <b>British National Formulary Header</b>               |
|----------------------------------------|--------------------------------------------------------|
| 1030100                                | H2 receptor antagonists                                |
| 01030100/01010201                      | H2 receptor antagonists/Alginate preparations          |
| 01030300/01030100                      | Chelates and complexes/H2 receptor antagonists         |
| 01030300/01030100                      | Chelates and complexes/H2 receptor antagonists         |
| 01030100/01010202                      | H2 receptor antagonists/Indigestion remedies           |
| 01010201/01030100                      | Compound Alginate Preparations/H2-Receptor Antagonists |
| 01010202/01030100                      | Indigestion Preparations/H2-Receptor Antagonists       |

---

Abbreviations: H2, Histamine-2.

**Supplementary Table 3. Reason for Discontinuation of Initial Acid Suppressant Treatment Course Under Alternate Grace Periods**

| <b>Reason for Discontinuation</b> | <b>Proton Pump Inhibitors<br/>(n=1,699,837)</b> | <b>Histamine-2 Receptor Antagonists<br/>(n=385,988)</b> |
|-----------------------------------|-------------------------------------------------|---------------------------------------------------------|
| <b>60 Day Grace Period †</b>      |                                                 |                                                         |
| Switch to other class             | 54,783 (3.2)                                    | 135,039 (35.0)                                          |
| Treatment gap > 60 days           | 778,676 (45.8)                                  | 103,837 (26.9)                                          |
| Administrative Censoring          | 866,378 (51.0)                                  | 147,112 (38.1)                                          |
| <b>7 Day Grace Period ‡</b>       |                                                 |                                                         |
| Switch to other class             | 31,818 (1.9)                                    | 111,100 (28.8)                                          |
| Treatment gap > 60 days           | 1,020,369 (60.0)                                | 147,753 (38.3)                                          |
| Administrative Censoring          | 647,650 (38.1)                                  | 127,135 (32.9)                                          |

† median duration of first treatment course for PPI users and H2RA users was 231 and 381 days, respectively

‡ median duration of first treatment course for PPI users and H2RA users was 66 and 149 days, respectively

1  
2  
3 **Supplementary Figure 1. Overall Prevalence of Proton Pump Inhibitor and Histamine-2**  
4 **Receptor Antagonist Use in New Users**  
5  
6  
7

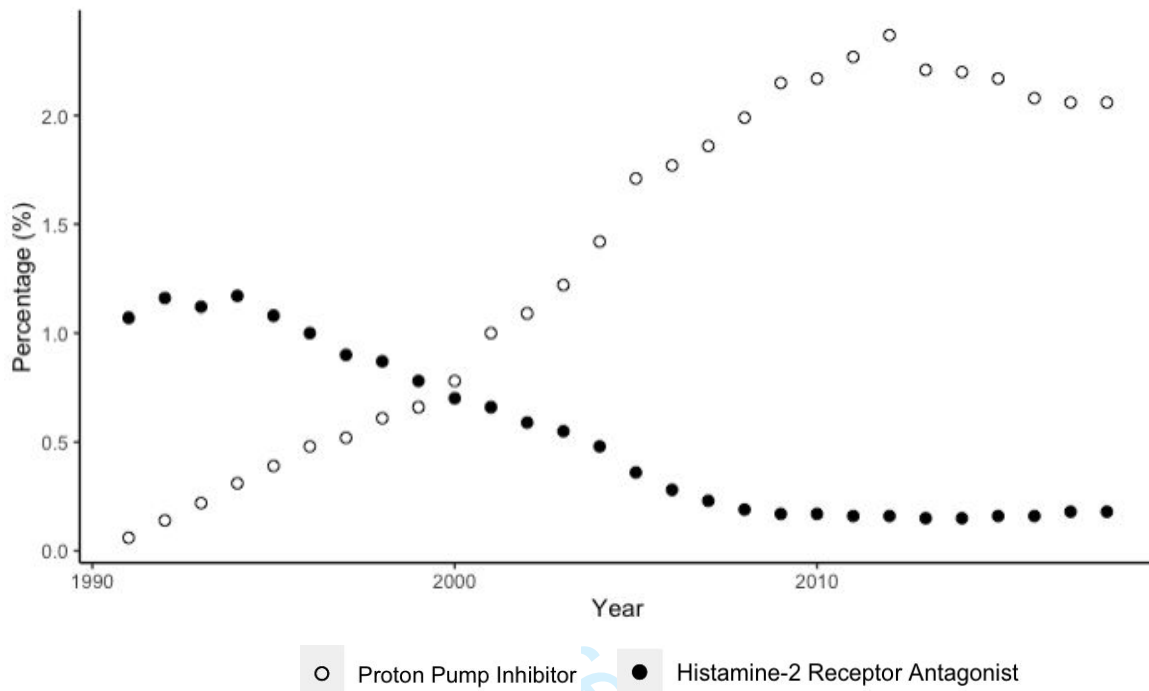

**Supplementary Figure 2. Sex-stratified Prevalence of Proton Pump Inhibitor and Histamine-2 Receptor Antagonist Use in New Users**

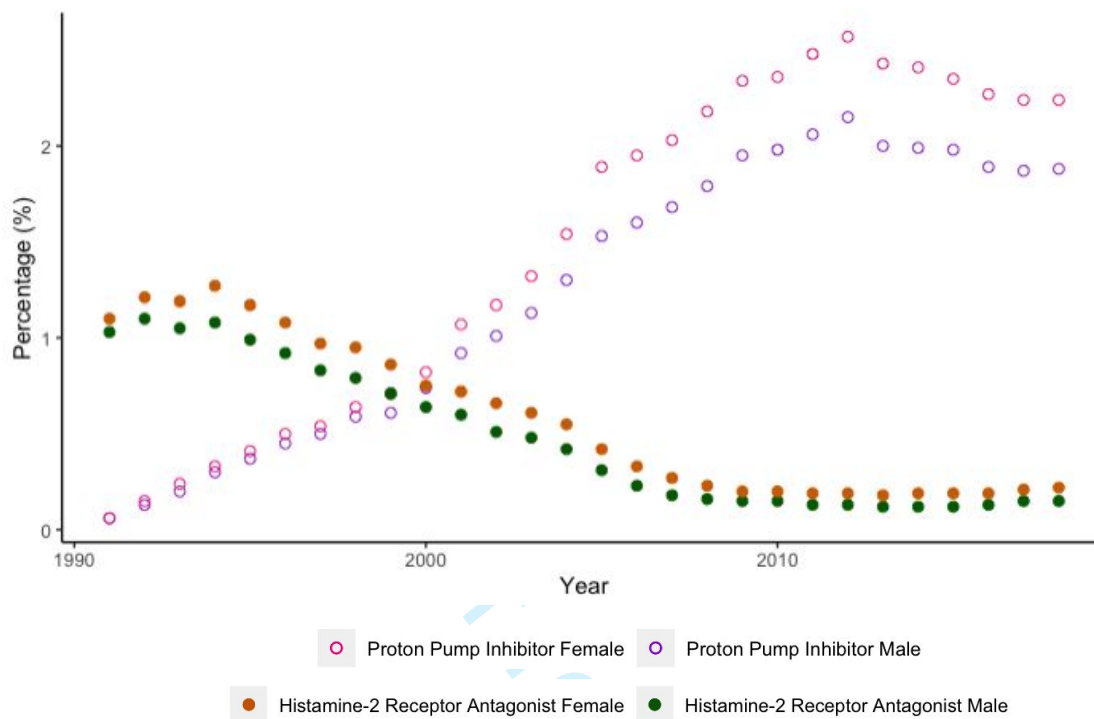

**Supplementary Figure 3. Age-stratified Prevalence of A) Proton Pump Inhibitor Use and  
b) Histamine-2 Receptor Antagonist Use in New Users**

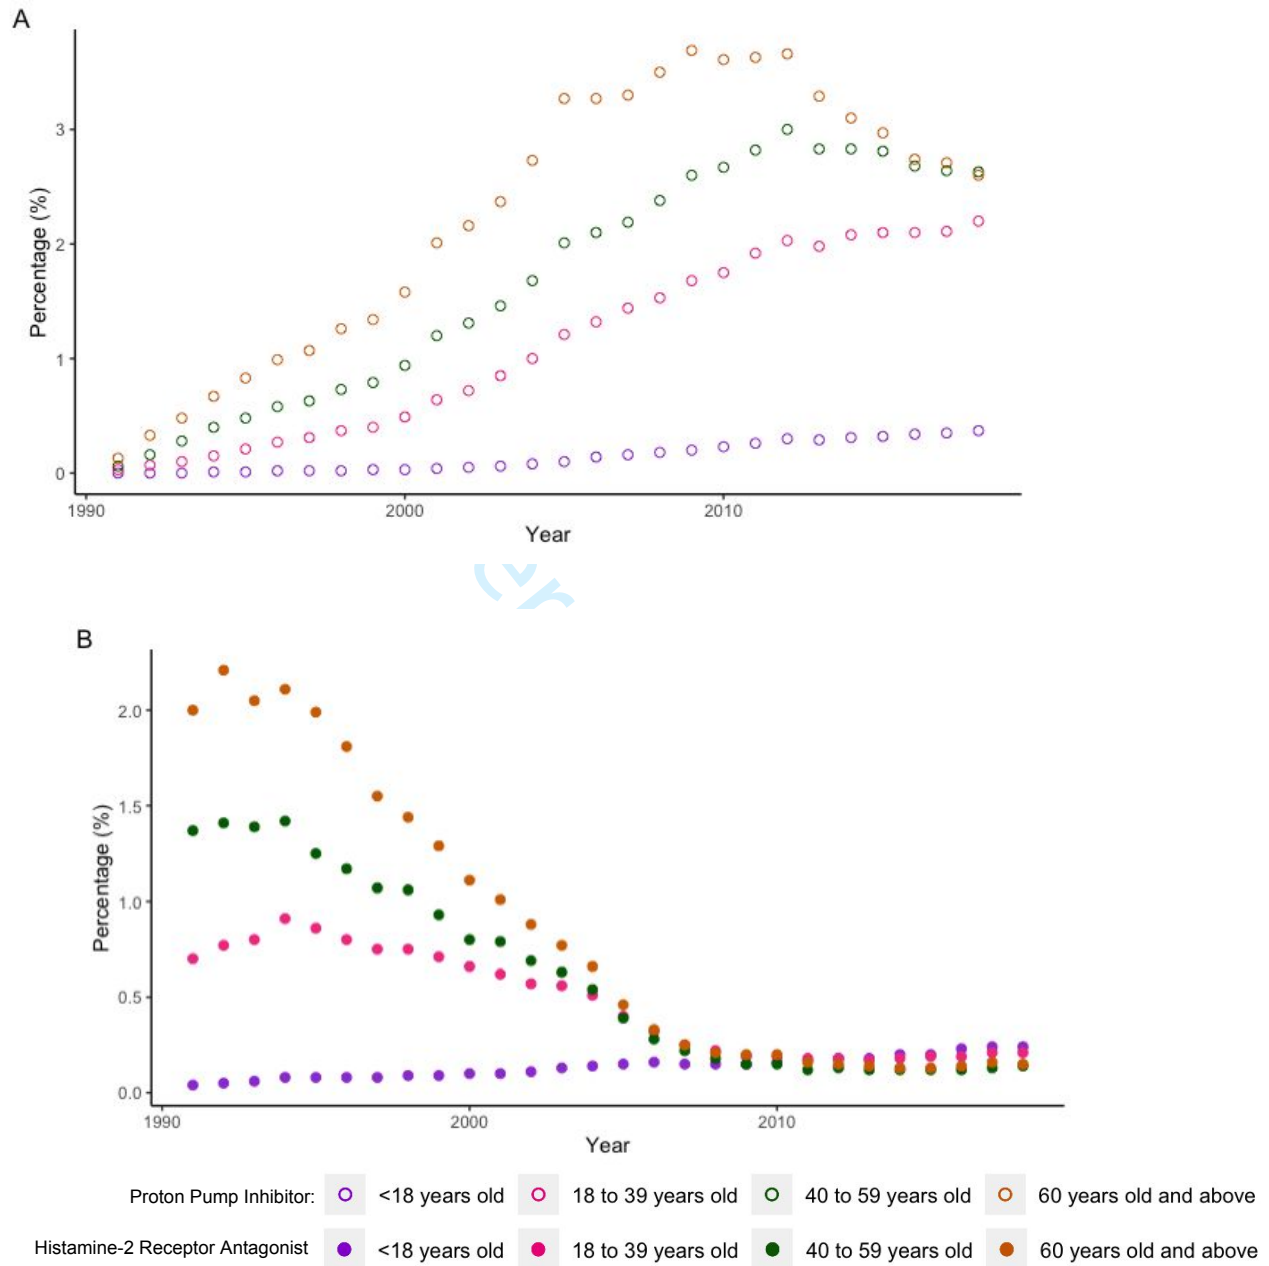

**Supplementary Figure 4. Prevalence of A) Proton Pump Inhibitor Prescriptions and B) Histamine-2 Receptor Antagonist Prescriptions Stratified by Individual Drug Type**

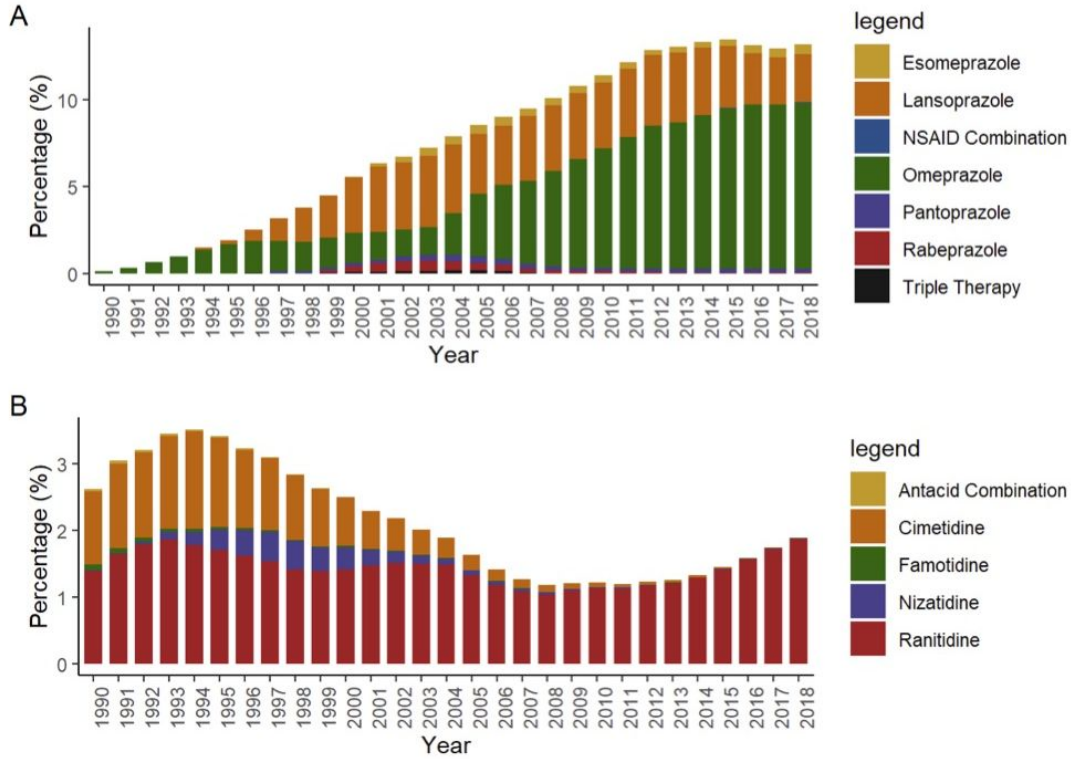

Supplementary Figure 5. Prescribing Intensity of Proton Pump Inhibitors and Histamine-2 Receptor Antagonists

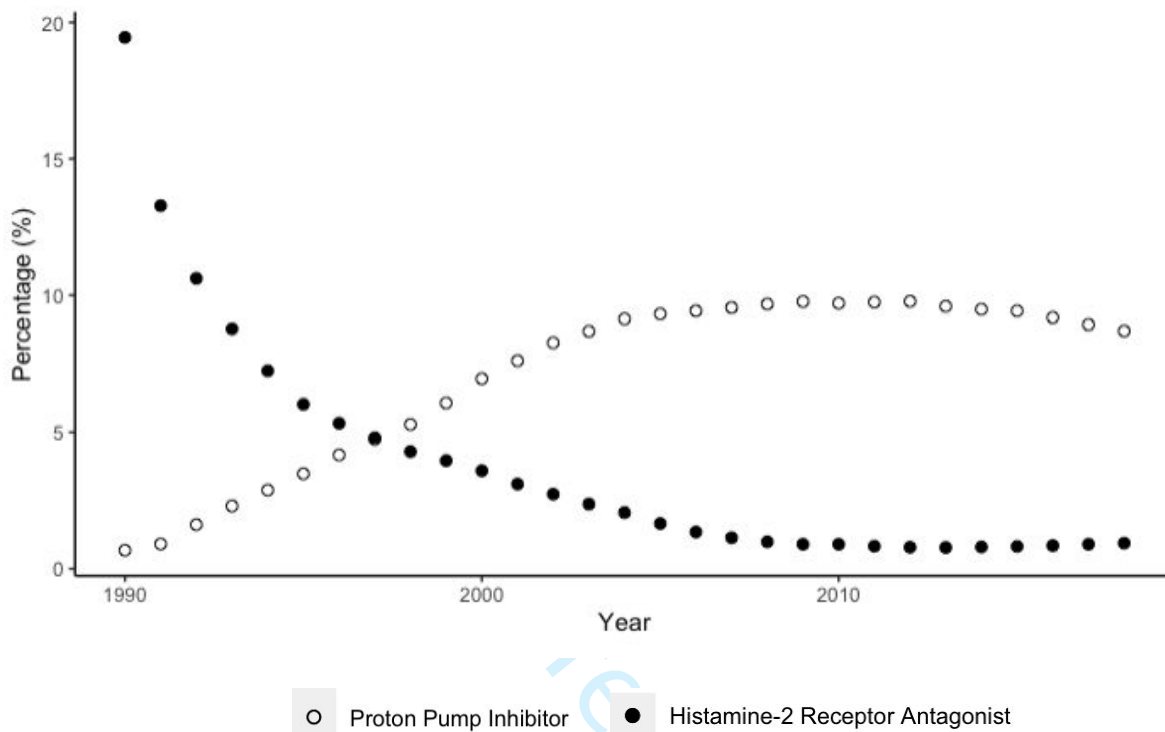

**STROBE 2007 (v4) Statement—Checklist of items that should be included in reports of *cross-sectional studies***

| Section/Topic                | Item # | Recommendation                                                                                                                                                                       | Reported on page # |
|------------------------------|--------|--------------------------------------------------------------------------------------------------------------------------------------------------------------------------------------|--------------------|
| <b>Title and abstract</b>    | 1      | (a) Indicate the study's design with a commonly used term in the title or the abstract                                                                                               | 1                  |
|                              |        | (b) Provide in the abstract an informative and balanced summary of what was done and what was found                                                                                  | 2,3                |
| <b>Introduction</b>          |        |                                                                                                                                                                                      |                    |
| Background/rationale         | 2      | Explain the scientific background and rationale for the investigation being reported                                                                                                 | 5                  |
| Objectives                   | 3      | State specific objectives, including any prespecified hypotheses                                                                                                                     | 6                  |
| <b>Methods</b>               |        |                                                                                                                                                                                      |                    |
| Study design                 | 4      | Present key elements of study design early in the paper                                                                                                                              | 7                  |
| Setting                      | 5      | Describe the setting, locations, and relevant dates, including periods of recruitment, exposure, follow-up, and data collection                                                      | 7                  |
| Participants                 | 6      | (a) Give the eligibility criteria, and the sources and methods of selection of participants                                                                                          | 7,8                |
| Variables                    | 7      | Clearly define all outcomes, exposures, predictors, potential confounders, and effect modifiers. Give diagnostic criteria, if applicable                                             | 8, 9, 10           |
| Data sources/<br>measurement | 8*     | For each variable of interest, give sources of data and details of methods of assessment (measurement). Describe comparability of assessment methods if there is more than one group | 8, 9, 10           |
| Bias                         | 9      | Describe any efforts to address potential sources of bias                                                                                                                            | 10                 |
| Study size                   | 10     | Explain how the study size was arrived at                                                                                                                                            | 7                  |
| Quantitative variables       | 11     | Explain how quantitative variables were handled in the analyses. If applicable, describe which groupings were chosen and why                                                         | 8, 9, 10           |
| Statistical methods          | 12     | (a) Describe all statistical methods, including those used to control for confounding                                                                                                | 8, 9, 10           |
|                              |        | (b) Describe any methods used to examine subgroups and interactions                                                                                                                  | 8, 9, 10           |
|                              |        | (c) Explain how missing data were addressed                                                                                                                                          | 8                  |
|                              |        | (d) If applicable, describe analytical methods taking account of sampling strategy                                                                                                   | NA                 |
|                              |        | (e) Describe any sensitivity analyses                                                                                                                                                | 10                 |
| <b>Results</b>               |        |                                                                                                                                                                                      |                    |



|                          |     |                                                                                                                                                                                                              |            |
|--------------------------|-----|--------------------------------------------------------------------------------------------------------------------------------------------------------------------------------------------------------------|------------|
| Participants             | 13* | (a) Report numbers of individuals at each stage of study—eg numbers potentially eligible, examined for eligibility, confirmed eligible, included in the study, completing follow-up, and analysed            | 12         |
|                          |     | (b) Give reasons for non-participation at each stage                                                                                                                                                         | NA         |
|                          |     | (c) Consider use of a flow diagram                                                                                                                                                                           | NA         |
| Descriptive data         | 14* | (a) Give characteristics of study participants (eg demographic, clinical, social) and information on exposures and potential confounders                                                                     | 12         |
|                          |     | (b) Indicate number of participants with missing data for each variable of interest                                                                                                                          | NA         |
| Outcome data             | 15* | Report numbers of outcome events or summary measures                                                                                                                                                         | 12, 13, 14 |
| Main results             | 16  | (a) Give unadjusted estimates and, if applicable, confounder-adjusted estimates and their precision (eg, 95% confidence interval). Make clear which confounders were adjusted for and why they were included | 13         |
|                          |     | (b) Report category boundaries when continuous variables were categorized                                                                                                                                    | NA         |
|                          |     | (c) If relevant, consider translating estimates of relative risk into absolute risk for a meaningful time period                                                                                             | NA         |
| Other analyses           | 17  | Report other analyses done—eg analyses of subgroups and interactions, and sensitivity analyses                                                                                                               | 12, 13, 14 |
| <b>Discussion</b>        |     |                                                                                                                                                                                                              |            |
| Key results              | 18  | Summarise key results with reference to study objectives                                                                                                                                                     | 15         |
| Limitations              | 19  | Discuss limitations of the study, taking into account sources of potential bias or imprecision. Discuss both direction and magnitude of any potential bias                                                   | 17         |
| Interpretation           | 20  | Give a cautious overall interpretation of results considering objectives, limitations, multiplicity of analyses, results from similar studies, and other relevant evidence                                   | 17         |
| Generalisability         | 21  | Discuss the generalisability (external validity) of the study results                                                                                                                                        | 17         |
| <b>Other information</b> |     |                                                                                                                                                                                                              |            |
| Funding                  | 22  | Give the source of funding and the role of the funders for the present study and, if applicable, for the original study on which the present article is based                                                | 4          |

\*Give information separately for cases and controls in case-control studies and, if applicable, for exposed and unexposed groups in cohort and cross-sectional studies.

**Note:** An Explanation and Elaboration article discusses each checklist item and gives methodological background and published examples of transparent reporting. The STROBE checklist is best used in conjunction with this article (freely available on the Web sites of PLoS Medicine at <http://www.plosmedicine.org/>, Annals of Internal Medicine at <http://www.annals.org/>, and Epidemiology at <http://www.epidem.com/>). Information on the STROBE Initiative is available at [www.strobe-statement.org](http://www.strobe-statement.org).

# BMJ Open

## Trends in Acid Suppressant Drug Prescriptions in Primary Care in the United Kingdom: A Population Based Cross Sectional Study

|                                 |                                                                                                                                                                                                                                                                                                                                                                                                                                                                                                                                   |
|---------------------------------|-----------------------------------------------------------------------------------------------------------------------------------------------------------------------------------------------------------------------------------------------------------------------------------------------------------------------------------------------------------------------------------------------------------------------------------------------------------------------------------------------------------------------------------|
| Journal:                        | <i>BMJ Open</i>                                                                                                                                                                                                                                                                                                                                                                                                                                                                                                                   |
| Manuscript ID                   | bmjopen-2020-041529.R1                                                                                                                                                                                                                                                                                                                                                                                                                                                                                                            |
| Article Type:                   | Original research                                                                                                                                                                                                                                                                                                                                                                                                                                                                                                                 |
| Date Submitted by the Author:   | 17-Aug-2020                                                                                                                                                                                                                                                                                                                                                                                                                                                                                                                       |
| Complete List of Authors:       | Abrahami, Devin; Lady Davis Institute for Medical Research, Centre for Clinical Epidemiology; McGill University, Epidemiology, Biostatistics, and Occupational Health<br>McDonald, Emily; McGill University Health Centre, General Internal Medicine; McGill University, Experimental Medicine<br>Schnitzer, Mireille; Université de Montréal, Pharmacy<br>Azoulay, Laurent; Lady Davis Institute for Medical Research, Centre for Clinical Epidemiology; McGill University, Epidemiology, Biostatistics, and Occupational Health |
| <b>Primary Subject Heading</b>: | Epidemiology                                                                                                                                                                                                                                                                                                                                                                                                                                                                                                                      |
| Secondary Subject Heading:      | Gastroenterology and hepatology                                                                                                                                                                                                                                                                                                                                                                                                                                                                                                   |
| Keywords:                       | EPIDEMIOLOGY, Gastrointestinal disease < GASTROENTEROLOGY, PRIMARY CARE                                                                                                                                                                                                                                                                                                                                                                                                                                                           |
|                                 |                                                                                                                                                                                                                                                                                                                                                                                                                                                                                                                                   |

SCHOLARONE™  
Manuscripts



I, the Submitting Author has the right to grant and does grant on behalf of all authors of the Work (as defined in the below author licence), an exclusive licence and/or a non-exclusive licence for contributions from authors who are: i) UK Crown employees; ii) where BMJ has agreed a CC-BY licence shall apply, and/or iii) in accordance with the terms applicable for US Federal Government officers or employees acting as part of their official duties; on a worldwide, perpetual, irrevocable, royalty-free basis to BMJ Publishing Group Ltd ("BMJ") its licensees and where the relevant Journal is co-owned by BMJ to the co-owners of the Journal, to publish the Work in this journal and any other BMJ products and to exploit all rights, as set out in our [licence](#).

The Submitting Author accepts and understands that any supply made under these terms is made by BMJ to the Submitting Author unless you are acting as an employee on behalf of your employer or a postgraduate student of an affiliated institution which is paying any applicable article publishing charge ("APC") for Open Access articles. Where the Submitting Author wishes to make the Work available on an Open Access basis (and intends to pay the relevant APC), the terms of reuse of such Open Access shall be governed by a Creative Commons licence – details of these licences and which [Creative Commons](#) licence will apply to this Work are set out in our licence referred to above.

Other than as permitted in any relevant BMJ Author's Self Archiving Policies, I confirm this Work has not been accepted for publication elsewhere, is not being considered for publication elsewhere and does not duplicate material already published. I confirm all authors consent to publication of this Work and authorise the granting of this licence.

# Trends in Acid Suppressant Drug Prescriptions in Primary Care in the United Kingdom: A Population Based Cross Sectional Study

Devin Abrahami<sup>1,2</sup>, Emily G. McDonald<sup>3,4</sup>, Mireille Schnitzer<sup>5</sup>, Laurent Azoulay<sup>1,2,6</sup>

<sup>1</sup> Centre for Clinical Epidemiology, Lady Davis Institute, Jewish General Hospital, Montreal, Canada

<sup>2</sup> Department of Epidemiology, Biostatistics, and Occupational Health, McGill University, Montreal, Canada

<sup>3</sup> Division of General Internal Medicine, Department of Medicine, McGill University Health Centre

<sup>4</sup> Division of Experimental Medicine, McGill University, Montreal Canada

<sup>5</sup> Faculty of Pharmacy, Université de Montréal, Montréal, Québec, Canada

<sup>6</sup> Gerald Bronfman Department of Oncology, McGill University, Montreal, Canada

**Abstract Word Count:** 263

**Word count:** 3,576

## Address for correspondence:

Dr Laurent Azoulay

Centre for Clinical Epidemiology, Lady Davis Institute, Jewish General Hospital

3755 Cote Sainte-Catherine Road, H425.1

Montreal, Quebec, Canada H3T 1E2

Telephone: (514) 340-8222 Ext. 28396

Fax: (514) 340-7564

Email: laurent.azoulay@mcgill.ca

August 13, 2020

## ABSTRACT

**Objective:** To examine proton pump inhibitors (PPI) and histamine-2 receptor antagonists (H2RA) prescribing patterns over a 29-year period by quantifying annual prevalence and prescribing intensity over time.

**Design:** Population based cross sectional study.

**Setting:** More than 700 general practices contributing data to the United Kingdom Clinical Practice Research Datalink.

**Participants:** Within a cohort of 14,242,329 patients registered in the Clinical Practice Research Datalink, 3,027,383 patients were prescribed at least one PPI or H2RA from January 1, 1990 to December 31, 2018.

**Primary and Secondary Outcome Measures:** Annual prescription rates were estimated by dividing the number of patients prescribed a PPI or H2RA by the total Clinical Practice Research Datalink population. Change in prescribing intensity (number of prescriptions per year divided by person-years of follow-up) was calculated using negative binomial regression.

**Results:** From 1990 to 2018, 21.3% of the CPRD population was exposed to at least one acid suppressant drug. During that period, PPI prevalence increased from 0.2-14.2%, while H2RA prevalence remained low (range: 1.2-3.4%). Yearly prescribing intensity to PPIs increased during the first 15 years of the study period but remained relatively constant for the remainder of the study period. In contrast, yearly prescribing intensity of H2RAs decreased from 1990 to 2009 but has begun to slightly increase over the past five years.

**Conclusions:** While PPI prevalence has been increasing over time, its prescribing intensity has recently plateaued. Notwithstanding their efficacy, PPIs are associated with a number of adverse

1  
2  
3 effects not attributed to H2RAs, whose prescribing intensity has begun to increase. Thus, H2RAs  
4 remain a valuable treatment option for individuals with gastric conditions.  
5  
6  
7  
8  
9

## 10 **STRENGTHS AND LIMITATIONS OF THIS STUDY**

- 11 - Largest and most comprehensive study to date describing trends of acid suppressant drugs  
12 over a 29-year period
- 13 - Large sample size allows detailed description of trends by age group, sex and indication
- 14 - Prescriptions in the Clinical Practice Research Datalink are issued by general practitioners,  
15 so it was not possible to assess patient adherence
- 16 - We did not have data on prescriptions recorded in hospital, by specialists, or from over the  
17 counter  
18  
19  
20  
21  
22  
23  
24  
25  
26  
27  
28  
29

30 **Funding Statement:** This study was funded by a Foundation Scheme Grant from the Canadian  
31 Institutes of Health Research (FDN-143328). The sponsor had no influence on design and conduct  
32 of the study; collection, management, analysis, and interpretation of the data; and preparation,  
33 review, or approval of the manuscript. DA is the recipient of a Vanier Canada Graduate  
34 Scholarship from the Canadian Institutes of Health Research. EGM receives Salary support from  
35 the Fonds de Recherche du Québec – Santé. MS holds a New Investigator Salary Award from the  
36 Canadian Institutes of Health Research and is the recipient of the Canadian Institutes of Health  
37 Research Canada Research Chair, tier 2. LA holds a Chercheur-Boursier Senior award from the  
38 Fonds de Recherche du Québec – Santé and is the recipient of a William Dawson Scholar Award  
39 from McGill University.  
40  
41  
42  
43  
44  
45  
46  
47  
48  
49  
50  
51  
52  
53  
54  
55  
56  
57  
58  
59  
60

1  
2  
3 **Competing Interests Statement:** The authors have no conflicts of interest to disclose.  
4  
5  
6  
7

8 **Author Contributions:** DA, EGM, MS and LA conceived and designed the study. LA acquired  
9  
10 the data. DA and LA did the statistical analyses. DA, EGM, MS and LA analysed and interpreted  
11  
12 the data. DA wrote the manuscript and all EGM, MS and LA critically revised the manuscript.  
13  
14 LA supervised the study and is the guarantor. DA, EGM, MS and LA approved the final version  
15  
16 of the manuscript and agree to be accountable for the accuracy of the work.  
17  
18  
19  
20

21 **Data Sharing:** No additional data available.  
22  
23  
24  
25  
26  
27  
28  
29  
30  
31  
32  
33  
34  
35  
36  
37  
38  
39  
40  
41  
42  
43  
44  
45  
46  
47  
48  
49  
50  
51  
52  
53  
54  
55  
56  
57  
58  
59  
60

## INTRODUCTION

Proton pump inhibitors (PPIs) and histamine 2 receptor antagonists (H2RAs) are acid suppressant drugs used in the management of gastric conditions, including peptic ulcer disease and gastro-oesophageal reflux disease.<sup>1 2</sup> The first H2RA, cimetidine, was approved for use in the United Kingdom (UK) in 1976, while omeprazole, a PPI, was later approved in 1989.<sup>3 4</sup> While both drug classes have been used for over three decades, PPIs have been shown to have superior efficacy in reducing stomach acid compared to H2RAs<sup>1</sup> and are thus more favourably used. Nonetheless, both drug classes are among the top 25 most prescribed medications in the hospital setting in the UK.<sup>5</sup>

In recent years, there have been concerns about the increasing uptake of PPIs, with emerging evidence that they are being prescribed to individuals without an evidence-based indication or for longer durations than necessary.<sup>6-10</sup> Indeed, the number of individuals using PPIs has been increasing significantly since their introduction in 1988.<sup>11</sup> In England alone, more than 50 million PPI prescriptions were dispensed in 2015.<sup>3</sup> In contrast, there is limited information on the older drug class, H2RAs, with regards to their prescribing patterns in recent years. It is also less well known whether H2RAs are also being overprescribed in a similar fashion to PPIs.

While PPIs are generally well tolerated and perceived to have an excellent safety profile,<sup>1</sup> recent evidence suggests that long-term use, beyond the recommended 4-8 week duration for most conditions, may be associated with certain adverse health outcomes. These include enteric infections such as *Clostridium difficile*, acute interstitial nephritis, hypomagnesaemia and increased intestinal colonization with multidrug resistant organisms.<sup>3 12-15</sup> Given their widespread use and these potential adverse effects, the National Institute for Health and Care Excellence (NICE) recommended new treatment guidelines for PPI use in primary care in 2014.<sup>16</sup> These new



1  
2  
3 guidelines emphasize an annual review to determine ongoing need, and to use the lowest dose of  
4  
5 PPI on an as-needed basis for symptom relief.<sup>16</sup> Treatment with H2RAs is recommended when  
6  
7 patients are unresponsive to PPIs.<sup>16</sup> Prescribing patterns of PPIs have not been evaluated since the  
8  
9 publication of these guidelines, and it remains unknown if the guidelines had an impact on the  
10  
11 uptake of H2RAs. Thus, the objective of this utilization study was to determine the prescribing  
12  
13 patterns of PPIs and H2RAs in UK primary care over a 29-year period.  
14  
15  
16  
17  
18  
19  
20  
21  
22  
23  
24  
25  
26  
27  
28  
29  
30  
31  
32  
33  
34  
35  
36  
37  
38  
39  
40  
41  
42  
43  
44  
45  
46  
47  
48  
49  
50  
51  
52  
53  
54  
55  
56  
57  
58  
59  
60

For peer review only

## METHODS

### *Data Source*

This study was conducted using the Clinical Practice Research Datalink (CPRD), a large primary care database with records of over 15 million patients, shown to be well representative of the general UK population.<sup>17 18</sup> The CPRD contains information on demographics, diagnoses and procedures,<sup>19</sup> and prescriptions issued by general practitioners are recorded using the British National Formulary. The data are audited regularly, and diagnoses recorded in the CPRD have been extensively validated.<sup>20 21</sup>

The study protocol was approved by the Independent Scientific Advisory Committee of the CPRD (protocol number 19\_119RA) and by the Research Ethics Board of the Jewish General Hospital. All authors had access to the study data and reviewed and approved the final manuscript.

### *Study Population*

Using the CPRD, we identified a cohort of patients who were registered with a general practitioner from January 1, 1990 to December 31, 2018. We did not impose any age restrictions to allow the evaluation of PPI and H2RA prescribing trends in both paediatric and adult populations. Patients were followed from the latest date at which their practice started contributing data to the CPRD, their personal date of registration with their general practice, or the start of the study period (January 1, 1990). Follow-up ended at the earliest date at which their practice stopped contributing data to the CPRD, their personal end of registration with their general practice, or the end of the study period (December 31, 2018).

### *Exposure Definition*

We identified all PPIs and H2RAs prescriptions within the study period using the British National Formulary (**Supplementary Tables 1 and 2**). This included five PPI types (omeprazole, esomeprazole, lansoprazole, pantoprazole, and rabeprazole) and four H2RA types (ranitidine, cimetidine, famotidine, and nizatidine). Prescription duration was calculated using the number of days' supply recorded in the CPRD. If this value was not recorded, we divided the prescription quantity by the numeric daily dose to ascertain duration. If none of these variables were recorded, we used the mode of the prescription duration for PPIs and H2RAs, separately.

### *Statistical Analysis*

#### *Prevalence*

For each calendar year, we calculated the prevalence of PPIs and H2RAs, separately. The numerator for these prescription rates was the number of individuals receiving either at least one acid suppressant drug in a given year (PPI and H2RA prescriptions were considered separately). The denominator was the total number of patients registered in the CPRD in a given year. Thus, prevalence was calculated per year by dividing the number of prescriptions over the number of patients in the CPRD for each calendar year between 1990 and 2018. Secondary analyses were conducted to determine prevalence among certain subgroups. Specifically, the rates were stratified by age ( $\leq 18$ , 19-39, 40-59,  $\geq 60$ ), sex, and individual drug type.

Prevalence was also calculated among new users only by restricting the population to individuals receiving their first acid suppressant prescription (i.e. PPI or H2RA) within the study period. To determine new use, individuals prescribed acid suppressants were required to have at least one year of medical history in the CPRD prior to their first prescription. Similarly, patients

1  
2  
3 in the CPRD were required to have at least one year of follow-up to contribute to the denominator.  
4  
5 Individuals co-prescribed a PPI and H2RA as their first prescription were excluded from this  
6  
7 analysis. Thus, prevalence was calculated for each year between 1991 and 2018 in new users and  
8  
9 stratified according to the same variables described above.  
10  
11  
12  
13

### 14 *Indications for use*

15  
16  
17 Indications for use among new users (i.e. first of either a PPI or H2RA prescription within  
18  
19 the study period) was inferred using Read codes recorded at any time prior to the first prescription.  
20  
21 Indications were classified as evidence-based (dyspepsia, gastroprotection, gastro-oesophageal  
22  
23 reflux disease, peptic ulcer disease, *Helicobacter pylori* infection, Barrett's oesophagus, and  
24  
25 Zollinger-Ellison syndrome), non-evidence based gastroprotection, off-label (stomach pain and  
26  
27 gastritis or duodenitis), and no recorded indication.<sup>2</sup> To define individuals using acid suppressant  
28  
29 drugs for gastroprotection, we considered individuals prescribed NSAIDs or dual antiplatelet  
30  
31 therapy within 90 days prior to their first PPI or H2RA prescription. To be classified as evidence-  
32  
33 based gastroprotection, these patients additionally required at least one of the following risk factors  
34  
35 (age  $\geq 60$ , history of bleed or ulcer, or concomitant use of anticoagulants, antiplatelets,  
36  
37 corticosteroids).<sup>2</sup> All individuals with a co-prescription for NSAIDs or dual antiplatelet therapy,  
38  
39 but without a risk factor, were assumed to be using acid suppressants for non-evidence based  
40  
41 gastroprotection. In secondary analyses, we stratified indications by sex and illustrated the  
42  
43 incidence of indications over time by dividing the number of patients with each indication per year  
44  
45 by the population in the CPRD with at least one year of follow-up.  
46  
47  
48  
49  
50  
51  
52  
53  
54  
55  
56  
57  
58  
59  
60

### *Prescribing Intensity*

For each calendar year, we calculated the prescribing intensity of PPI and H2RA use, separately. The numerator for these rates was the number of prescriptions received for either acid suppressant drug in a given year (prescriptions longer than 30 days were converted into 30-day equivalents [e.g. one 90-day prescription was equivalent to three 30-day prescriptions], for a maximum of 12 prescriptions per year). The denominator for these rates was the total person-years of follow-up that were contributed by drug users in a given year. Thus, yearly prescribing incidence rates based were calculated by dividing the number of prescriptions over the person-years of follow-up for each year between 1990 and 2018. To determine whether prescribing intensity changed during the study period, we stratified the study period by five-year intervals and estimated incident rate ratios (IRRs) with 95% CIs using negative binomial regression, with log of follow-up time included as an offset variable.

### *Persistence*

As there is some evidence that PPIs are being used for inappropriate durations,<sup>6-10</sup> but there is limited evidence on H2RA use, we examined persistence to both drugs by calculating the cumulative incidence of discontinuation in new users of PPIs and H2RAs. Time to discontinuation was defined as the time from the first prescription of an acid suppressant drug to the end of the first treatment episode. Exposure was considered continuous if the duration of one prescription overlapped with the start of the subsequent prescription, allowing for a 30-day grace period. The end of a treatment episode was defined as the first of: 1) a treatment gap exceeding 30 days, 2) a switch from PPI to H2RA or vice versa, or 3) administrative censoring (i.e. if a practice stopped contributing data to the CPRD, a patient was no longer registered with their general practice, or if

1  
2  
3 the study period ended). The length of the grace period was changed to 7 and 60 days in a  
4 sensitivity analysis. We used Kaplan-Meier curves to illustrate the cumulative incidence of  
5 discontinuation of PPIs and H2RAs, separately, as a function of duration of use to show the  
6 cumulative probability of persisting to the first treatment episode. In a secondary analysis, we  
7 described the cumulative incidence of discontinuation according to indications for use (evidence-  
8 based, non-evidence based gastroprotection, off-label, and no recorded indication). All analyses  
9 described above were conducted with SAS version 9.4 (SAS institute, Cary, NC) and R (R  
10 Foundation for Statistical Computing, Vienna, Austria).

### 11 12 13 14 15 16 17 18 19 20 21 22 23 24 *Patient Involvement*

25  
26 We did not include patients as study participants, as our study involved the use of secondary  
27 data. Patients were not involved in the design or implementation of the study. We do not plan to  
28 involve patients in the dissemination of results, nor will we disseminate results directly to patients.  
29  
30  
31  
32  
33  
34  
35  
36  
37  
38  
39  
40  
41  
42  
43  
44  
45  
46  
47  
48  
49  
50  
51  
52  
53  
54  
55  
56  
57  
58  
59  
60

## RESULTS

Within a cohort of 14,242,329 patients (51.4% female) registered in the CPRD, 3,027,383 (21.3%) patients were prescribed at least one PPI or H2RA during the study period, corresponding to 58,926,373 and 9,386,908 prescriptions, respectively. Among patients prescribed an acid suppressant drug, there were 1,654,323 (54.7%) females and 2,920,176 (96.5%) adults (at least 18 years old). Throughout follow-up, there were 2,714,785 (19.1%) individuals prescribed at least one PPI, 855,248 (6.0%) individuals prescribed at least one H2RA, and 542,650 (3.8%) individuals prescribed both drug classes.

Among patients newly-prescribed an acid suppressant drug (n=2,085,825), 81.5% (n=1,699,837) were initially prescribed a PPI, while 18.5% (n=385,988) were initially prescribed a H2RA. **Table 1** presents the characteristics of these users at the time of their first prescription. PPI users were slightly older than H2RA users at the time of initial prescription, but there were no sex differences between the two groups. Only 43.5% and 45.3% of PPI and H2RA users, respectively, had an evidence-based indication for use, with dyspepsia being the most common recorded indication. Non-evidence based gastroprotection was more common in PPI users (21.4%) than the H2RA users (13.3%). About one in five PPI and H2RA users did not have a recorded indication for use. When stratifying indications by sex, females were more commonly prescribed PPIs for off-label indications compared to males (**Supplementary Table 3**). The incidence of indications for acid suppressant use was relatively consistent over time, with gastro-oesophageal reflux disease the only evidence-based indication that slightly increased over follow-up (**Supplementary Figure 1**).

**Figures 1 to 3** illustrate the overall, sex and age-stratified prevalence of PPI and H2RA, respectively. Throughout follow-up, PPI prevalence sharply increased from 0.2% in 1990 to 14.2%

1  
2  
3 in 2018. In contrast, the prevalence of H2RAs remained consistently low throughout the study  
4 period (range: 1.2 to 3.4%). PPIs were more commonly prescribed in females and both drug classes  
5 were more commonly prescribed in adults at least 60 years old. Overall and sex-stratified  
6 prevalence of use were similar among new users (**Supplementary Figures 2 and 3**), though the  
7 prevalence of H2RA use among new users was consistent across all age categories over the past  
8 decade (**Supplementary Figure 4**). Omeprazole was the most commonly prescribed PPI during  
9 the study period, followed by lansoprazole (**Supplementary Figure 5**). At the beginning of the  
10 study period, ranitidine and cimetidine were both frequently prescribed, though after 2004  
11 ranitidine was almost exclusively the only H2RA prescribed (**Supplementary Figure 5**).

12  
13  
14  
15  
16  
17  
18  
19  
20  
21  
22  
23  
24 Throughout the study period, the prescribing intensity of PPIs ranged from 0.07% in 1990,  
25 increasing to a peak intensity of 0.98% in 2012. In contrast, the prescribing intensity of H2RA use  
26 decreased over the study period from the highest intensity of 1.95% in 1990, to the lowest intensity  
27 of 0.08% in 2013 (**Supplementary Figure 6**). PPI yearly prescribing intensity sharply increased  
28 during the first 5 years of the study period, moderately increased until 2004, after which  
29 prescribing intensity plateaued (**Supplementary Table 4**). In contrast, H2RA yearly prescribing  
30 intensity decreased from 1990 to 2009, and has begun to increase slightly over the past five years.

31  
32  
33  
34  
35  
36  
37  
38  
39  
40 Within new users of PPIs (n=1,699,837) the median duration of the first treatment course  
41 was 144 (interquartile range [IQR]: 59 to 870) days. Reasons for discontinuation are presented in  
42 **Table 1**, which illustrates that the majority of PPI users (52.5%) discontinued their first treatment  
43 course due to a gap of at least 30 days between prescriptions. Overall, a small percentage (2.1%)  
44 of PPI users discontinued their original treatment due to a switch to H2RAs. In contrast, the median  
45 duration of the first H2RA treatment course among new H2RA users (n=385,988) was 279 (IQR:  
46 61 to 1,645) days. Approximately one-third of H2RA users discontinued use due to each of the



1  
2  
3 following: a treatment gap exceeding 30 days, administrative censoring, or because of a switch to  
4 a PPI. **Supplementary Table 5** presents duration of treatment and reasons for discontinuation  
5 under alternate grace periods. When a grace period of 7 days was applied, the median (IQR)  
6 duration of PPI and H2RA use was 66 (36 to 560) and 149 (38 to 1,479) days, respectively. When  
7 a grace period of 60 days was used, the median (IQR) duration of PPI use was 231 (89 to 1,097)  
8 days, and H2RA use was 381 (91 to 1,785) days. The reasons for discontinuation remained  
9 consistent when considering these alternate grace periods.  
10  
11  
12  
13  
14  
15  
16  
17  
18

19 **Figure 4** illustrates the time to discontinuation of both drug classes. While persistence to  
20 PPIs and H2RAs declined within the first year of use, 37.5% of PPI users and 46.9% of H2RA  
21 users persisted to their original treatment course beyond the one-year recommended duration,<sup>16</sup>  
22 and 12.6% of PPI users and 23.1% of H2RA users persisted to their original treatment course after  
23 5 years. When examining persistence by indication, persistence to both PPIs and H2RAs was  
24 highest among patients with an off-label or no recorded indication for use (**Supplementary**  
25 **Figures 7 to 10**).  
26  
27  
28  
29  
30  
31  
32  
33  
34  
35  
36  
37  
38  
39  
40  
41  
42  
43  
44  
45  
46  
47  
48  
49  
50  
51  
52  
53  
54  
55  
56  
57  
58  
59  
60

## DISCUSSION

To our knowledge, this is the largest and most comprehensive study conducted to date to examine prescribing patterns of both PPIs and H2RAs in the UK. Throughout the study period, 21.3% of the CPRD population received at least one prescription for an acid suppressant drug (PPI only: 19.1%, H2RA only: 6%, PPI and H2RA: 3.8%). The overall prevalence of PPI prescribing has increased from 1990 to 2018, while the prevalence of H2RA remained low. Yearly prescribing intensity to PPIs increased during the first 15 years of the study period, but remained relatively consistent for the remainder of the study period. In contrast, yearly prescribing intensity of H2RAs decreased from 1990 to 2009 but has begun to increase over the past five years.

The overall high prevalence of PPI use in the UK is consistent with a utilization study of PPIs using CPRD data, but whose follow-up period ended at the end of 2014.<sup>11</sup> Importantly, our study further contextualizes the landscape of prescribing acid suppressant drugs by also describing trends of H2RA use. While H2RAs are considerably less popular than PPIs, we observed almost 10 million prescriptions within our study period, suggesting that their use has not been completely supplanted by PPIs. While use of H2RAs may be associated with delirium and acute interstitial nephritis,<sup>22 23</sup> they are generally well tolerated. Indeed, H2RAs are more commonly associated with mild adverse effects like headache and constipation,<sup>22</sup> not the serious adverse effects associated with use of PPIs.<sup>3 12-15</sup> Thus, H2RAs continue to represent an important treatment option for individuals with gastric conditions. Finally, while the prevalence of acid suppressant drugs is consistent with the market availability of both drug classes, it cannot be explained by an increase in the incidence of indications for PPIs and H2RAs, which have been relatively consistent over time.

1  
2  
3 To our knowledge, this is the first study to describe contemporary prescribing practices  
4 following the most recent NICE recommendations in 2014.<sup>16</sup> Given that H2RA prescribing  
5 intensity has begun to increase following publication of the guidelines, this may suggest a gradual  
6 shift in prescribing to favour H2RAs. Indeed, the guidelines recommend treatment with PPIs at  
7 the lowest dose for the shortest amount of time, and thus may favour longer-term H2RA  
8 prescriptions. Future studies should investigate the impact of the NICE recommendations more  
9 thoroughly.

10  
11  
12  
13  
14  
15  
16  
17  
18  
19 Our study demonstrated a sex difference among PPI prescribing patterns and an age  
20 difference among prescribing patterns of both PPIs and H2RAs; women were more frequently  
21 prescribed PPIs and adults at least 60 years old were more frequently prescribed both drug classes.  
22 As women are more likely to report symptoms of gastric reflux than men,<sup>24</sup> this would lead to  
23 more frequent prescribing of acid suppressant drugs to manage these symptoms. Moreover,  
24 dyspepsia, the most common evidence-based indication, was more commonly diagnosed in  
25 women. The age difference may be explained by the increasing incidence of dyspepsia with age,<sup>25</sup>  
26 or through an increased need for gastroprotection in the elderly, whereby patients over the age of  
27 60 who are prescribed NSAIDs or dual antiplatelet therapy are indicated to receive an acid  
28 suppressant drug for gastroprotection.<sup>2</sup>

29  
30  
31  
32  
33  
34  
35  
36  
37  
38  
39  
40  
41  
42 In recent years, there have been concerns about the increasing inappropriate use of PPIs.<sup>6</sup>  
43  
44  
45  
46  
47  
48  
49  
50  
51  
52  
53  
54  
55  
56  
57  
58  
59  
60  
7 Indeed, between 40% and 55% of primary care patients in the United States and the UK do not  
have an evidence-based indication for long-term PPI use.<sup>26 27</sup> This is particularly relevant as PPIs  
are associated with a number of serious adverse events including enteric infections and  
hypomagnesemia.<sup>3 12-15</sup> While there is some evidence that use of PPIs may also be associated with  
dementia, pneumonia and gastric cancer,<sup>3 28</sup> not all studies have confirmed these associations.<sup>29 30</sup>

1  
2  
3 Our study adds to the growing literature surrounding inappropriate use, as we illustrated that these  
4 issues extend to H2RA users as well. Indeed, a little over 20% of PPI and H2RA users have no  
5 recorded indication for use, while 37.5% and 46.9%, respectively, remain on their original  
6 treatment course at one year of follow-up, despite recommendations to limit use to 4-8 weeks at a  
7 time for symptomatic treatment of gastro-oesophageal disease and peptic ulcer disease.<sup>16</sup> As  
8 illustrated by the stratified persistence patterns, a significant portion of this high persistence is  
9 among patients with an off-label, or no recorded indication for use. This provides further evidence  
10 on the inappropriate use of acid suppressant drugs.  
11  
12  
13  
14  
15  
16  
17  
18  
19  
20

21 This study has several strengths. To our knowledge, this is the largest and most  
22 comprehensive study to date describing the trends of acid suppressant drugs over time. Our study  
23 describes the use of PPIs and H2RAs over a 29-year period, which is almost the entirety of PPI  
24 market availability. Importantly, we provide new data on the recent use of H2RAs, which indicates  
25 that this drug class is gaining favour among general practitioners. Second, the data we used in this  
26 study has been well validated,<sup>20 21</sup> and shown to be representative of the UK general population.<sup>17</sup>  
27  
28  
29  
30  
31  
32  
33  
34  
35  
36  
37  
38  
39  
40  
41  
42  
43  
44  
45  
46  
47  
48  
49  
50  
51  
52  
53  
54  
55  
56  
57  
58  
59  
60

18 Finally, the large sample size allowed us to provide detailed information of trends by age group  
and sex, and investigate use among rare indications, including Barrett's oesophagus and Zollinger-  
Ellison syndrome.

This study also has some limitations. Prescriptions recorded in the CPRD are those issued  
by general practitioners, and thus it is not possible to assess patient adherence or determine if a  
patient filled a prescription. While this may slightly affect the estimate of cumulative incidence of  
discontinuation, the rest of our analyses focus on physician prescribing trends. These would not  
be influenced by patient adherence and are a better indicator of whether physicians are following  
guidelines. Second, it is possible that the trends reported in this study are underestimated, as we

1  
2  
3 do not have information on prescriptions recorded in hospital or by specialists. However, this is  
4  
5 unlikely to lead to substantial underestimation, as general practitioners in the UK are responsible  
6  
7 for long-term patient care.<sup>31</sup> However, it remains possible that the lack of hospitalization data led  
8  
9 to the underestimation of patients requiring short-term treatment with acid suppressant drugs.  
10  
11 Third, this study uses data from the UK only, and as such, it is possible that prescribing trends will  
12  
13 differ in alternate settings. Finally, this study did not include data on over the counter use of  
14  
15 medications. Thus, the relatively high prevalence of patients exposed to acid suppressant drugs  
16  
17 (21.3%) would be even higher if over the counter PPI and H2RA usage was considered. Lack of  
18  
19 over the counter data may have led to the underestimation of patients using acid suppressant drugs  
20  
21 for gastroprotection, as it is possible that some patients receive an NSAID prescription over the  
22  
23 counter.  
24  
25  
26  
27

28  
29 This study demonstrates that while prevalence of PPI use has increased with time, its  
30  
31 prescribing intensity has plateaued over the past 15 years. In contrast, while prevalence of H2RAs  
32  
33 was consistently low throughout the study period, its prescribing intensity has begun to slightly  
34  
35 increase over the past five years. Given that PPIs are associated certain adverse effects not  
36  
37 attributed to H2RAs, H2RAs remain a valuable treatment option for individuals with gastric  
38  
39 conditions.  
40  
41  
42  
43  
44  
45  
46  
47  
48  
49  
50  
51  
52  
53  
54  
55  
56  
57  
58  
59  
60

**REFERENCES**

1. Strand DS, Kim D, Peura DA. 25 Years of Proton Pump Inhibitors: A Comprehensive Review. *Gut and liver* 2017;11(1):27-37. doi: 10.5009/gnl15502 [published Online First: 11/14]
2. Benmassaoud A, McDonald EG, Lee TC. Potential harms of proton pump inhibitor therapy: rare adverse effects of commonly used drugs. 2016;188(9):657-62. doi: 10.1503/cmaj.150570 %J Canadian Medical Association Journal
3. The Development and Safety of Proton Pump Inhibitors. *The Pharmaceutical Journal* 2016;296(7890)
4. Molinder HK. The development of cimetidine: 1964-1976. A human story. *J Clin Gastroenterol* 1994;19(3):248-54. doi: 10.1097/00004836-199410000-00017 [published Online First: 1994/10/01]
5. Audi S, Burrage DR, Lonsdale DO, et al. The 'top 100' drugs and classes in England: an updated 'starter formulary' for trainee prescribers. *British journal of clinical pharmacology* 2018;84(11):2562-71. doi: 10.1111/bcp.13709
6. Walsh K, Kwan D, Marr P, et al. Deprescribing in a family health team: a study of chronic proton pump inhibitor use. *Journal of primary health care* 2016;8(2):164-71. doi: 10.1071/hc15946 [published Online First: 2016/08/02]
7. Katz MH. Failing the acid test: Benefits of proton pump inhibitors may not justify the risks for many users. *Archives of Internal Medicine* 2010;170(9):747-48. doi: 10.1001/archinternmed.2010.64
8. Prescribing PPIs. *Drug and Therapeutics Bulletin* 2017;55(10), 11(55(10), 117)

- 1  
2  
3 9. Farrell B, Pottie K, Thompson W, et al. Deprescribing proton pump inhibitors: Evidence-  
4 based clinical practice guideline. *Can Fam Physician* 2017;63(5):354-64. [published  
5 Online First: 2017/05/14]  
6  
7
- 8  
9  
10 10. Forgacs I, Loganayagam A. Overprescribing proton pump inhibitors. *BMJ (Clinical research*  
11 *ed)* 2008;336(7634):2-3. doi: 10.1136/bmj.39406.449456.BE  
12  
13
- 14  
15 11. Othman F, Card TR, Crooks CJ. Proton pump inhibitor prescribing patterns in the UK: a  
16 primary care database study. *Pharmacoepidemiol Drug Saf* 2016;25(9):1079-87. doi:  
17 10.1002/pds.4043 [published Online First: 2016/06/04]  
18  
19
- 20  
21 12. Nehra AK, Alexander JA, Loftus CG, et al. Proton Pump Inhibitors: Review of Emerging  
22 Concerns. *Mayo Clinic Proceedings* 2018;93(2):240-46. doi:  
23 10.1016/j.mayocp.2017.10.022  
24  
25
- 26  
27 13. Yang Y, George KC, Shang W-F, et al. Proton-pump inhibitors use, and risk of acute kidney  
28 injury: a meta-analysis of observational studies. *Drug design, development and therapy*  
29 2017;11:1291-99. doi: 10.2147/DDDT.S130568  
30  
31
- 32  
33 14. McDonald EG, Milligan J, Frenette C, et al. Continuous Proton Pump Inhibitor Therapy and  
34 the Associated Risk of Recurrent Clostridium difficile InfectionPPI Therapy and  
35 Recurrent C difficile InfectionPPI Therapy and Recurrent C difficile Infection. *JAMA*  
36 *Internal Medicine* 2015;175(5):784-91. doi: 10.1001/jamainternmed.2015.42 %J JAMA  
37  
38  
39  
40  
41  
42  
43  
44  
45  
46  
47  
48  
49  
50  
51  
52  
53  
54  
55  
56  
57  
58  
59  
60
15. Willems RP, van Dijk K, Ket JC, et al. Evaluation of the association between gastric acid  
suppression and risk of intestinal colonization with multidrug-resistant microorganisms: a  
systematic review and meta-analysis. *JAMA internal medicine* 2020;180(4):561-71.

- 1  
2  
3 16. Gastro-oesophageal reflux disease and dyspepsia in adults: investigation and management  
4  
5 National Institute for Health and Care Excellence 2014 [  
6  
7  
8 17. Herrett E, Gallagher AM, Bhaskaran K, et al. Data Resource Profile: Clinical Practice  
9  
10 Research Datalink (CPRD). *Int J Epidemiol* 2015;44(3):827-36. doi: 10.1093/ije/dyv098  
11  
12 [published Online First: 2015/06/08]  
13  
14  
15 18. Wolf A, Dedman D, Campbell J, et al. Data resource profile: Clinical Practice Research  
16  
17 Datalink (CPRD) Aurum. *International Journal of Epidemiology* 2019 doi:  
18  
19 10.1093/ije/dyz034  
20  
21  
22 19. Read codes. United Kingdom National Health Service 2010 [Available from:  
23  
24 <https://www.nlm.nih.gov/research/umls/sourcereleasedocs/current/RCD/> accessed 2017.  
25  
26  
27 20. Jick SS, Kaye JA, Vasilakis-Scaramozza C, et al. Validity of the general practice research  
28  
29 database. *Pharmacotherapy* 2003;23(5):686-9. [published Online First: 2003/05/14]  
30  
31  
32 21. Lawrenson R, Williams T, Farmer R. Clinical information for research; the use of general  
33  
34 practice databases. *J Public Health Med* 1999;21(3):299-304. [published Online First:  
35  
36 1999/10/21]  
37  
38  
39 22. Nugent CC, Terrell JM. H2 Blockers. StatPearls [Internet]: StatPearls Publishing 2019.  
40  
41  
42 23. Fisher AA, Le Couteur DG. Nephrotoxicity and hepatotoxicity of histamine H2 receptor  
43  
44 antagonists. *Drug Saf* 2001;24(1):39-57. doi: 10.2165/00002018-200124010-00004  
45  
46 [published Online First: 2001/02/24]  
47  
48  
49 24. Kim YS, Kim N, Kim GH. Sex and gender differences in gastroesophageal reflux disease.  
50  
51 *Journal of neurogastroenterology and motility* 2016;22(4):575.  
52  
53  
54 25. Piessevaux H, De Winter B, Louis E, et al. Dyspeptic symptoms in the general population: a  
55  
56 factor and cluster analysis of symptom groupings. *Neurogastroenterol Motil*



- 2009;21(4):378-88. doi: 10.1111/j.1365-2982.2009.01262.x [published Online First: 02/12]
26. Heidelbaugh JJ, Goldberg KL, Inadomi JM. Magnitude and economic effect of overuse of antisecretory therapy in the ambulatory care setting. *The American journal of managed care* 2010;16(9):e228-34.
27. Batuwitage BT, Kingham JG, Morgan NE, et al. Inappropriate prescribing of proton pump inhibitors in primary care. *Postgraduate Medical Journal* 2007;83(975):66-68.
28. Wan Q-Y, Wu X-T, Li N, et al. Long-term proton pump inhibitors use and risk of gastric cancer: a meta-analysis of 926 386 participants. *Gut* 2018:gutjnl-2018-316416. doi: 10.1136/gutjnl-2018-316416
29. Park SK, Nam JH, Lee H, et al. Beyond uncertainty: Negative findings for the association between the use of proton pump inhibitors and risk of dementia. *J Gastroenterol Hepatol* 2019;34(12):2135-43.
30. Moayyedi P, Eikelboom JW, Bosch J, et al. Safety of Proton Pump Inhibitors Based on a Large, Multi-Year, Randomized Trial of Patients Receiving Rivaroxaban or Aspirin. *Gastroenterology* 2019;157(3):682-91.e2. doi: 10.1053/j.gastro.2019.05.056 [published Online First: 2019/06/04]
31. Ahrens D, Behrens G, Himmel W, et al. Appropriateness of proton pump inhibitor recommendations at hospital discharge and continuation in primary care. *International journal of clinical practice* 2012;66(8):767-73. doi: 10.1111/j.1742-1241.2012.02973.x [published Online First: 2012/07/19]

**Table 1. Characteristics of Individuals Newly Prescribed Proton Pump Inhibitors and Histamine-2 Receptor Antagonists**

| Characteristic                             | Proton Pump Inhibitors † | Histamine-2 Receptor Antagonists ‡ |
|--------------------------------------------|--------------------------|------------------------------------|
| Total                                      | 1,699,837                | 385,988                            |
| Male, n (%)                                | 768,781 (45.2)           | 167,683 (43.4)                     |
| Age, years (mean, SD)                      | 53.4 (18.9)              | 48.6 (21.1)                        |
| Age group, n (%)                           |                          |                                    |
| < 18 years                                 | 34,590 (2.0)             | 30,057 (7.8)                       |
| 18-39 years                                | 393,052 (23.1)           | 109,205 (28.3)                     |
| 40-59 years                                | 596,469 (35.1)           | 116,174 (30.1)                     |
| ≥60 years                                  | 675,726 (39.8)           | 130,552 (33.8)                     |
| Evidence-based indication, n (%)§          | 740,177 (43.5)           | 174,836 (45.3)                     |
| Dyspepsia                                  | 316,831                  | 112,737                            |
| Gastroprotection                           | 288,360                  | 41,350                             |
| Gastro-oesophageal reflux disease          | 158,405                  | 33,480                             |
| Peptic ulcer disease                       | 50,239                   | 14,453                             |
| Helicobacter pylori infection              | 41,430                   | 2,526                              |
| Barrett's oesophagus                       | 4,180                    | 137                                |
| Zollinger-Ellison syndrome                 | 24                       | 5                                  |
| Non-evidence based gastroprotection, n (%) | 363,992 (21.4)           | 51,476 (13.3)                      |
| Off-label indication, n (%)§               | 253,591 (14.9)           | 72,431 (18.8)                      |
| Stomach pain                               | 231,715                  | 64,188                             |
| Gastritis or duodenitis                    | 35,908                   | 13,096                             |
| No recorded indication, n (%)              | 342,077 (20.1)           | 87,245 (22.6)                      |
| Reason for discontinuation ¶               |                          |                                    |
| Switch to other class                      | 43,988 (2.6)             | 124,648 (32.3)                     |
| Treatment gap > 30 days                    | 893,230 (52.5)           | 122,928 (31.8)                     |
| Administrative Censoring                   | 762,619 (44.9)           | 138,412 (35.9)                     |

§ Indication categories are not mutually exclusive.

¶ Median (interquartile range) duration of first treatment course for PPI users and H2RA users was 144 (59 to 870) days and 279 (61 to 1,645) days, respectively.

**FIGURE LEGENDS**

- 1  
2  
3  
4  
5 Figure 1 Overall Prevalence of Proton Pump Inhibitor and Histamine-2 Receptor  
6 Antagonist Use  
7  
8 Figure 2 Sex-stratified Prevalence of Proton Pump Inhibitor and Histamine-2 Receptor  
9 Antagonist Use  
10  
11 Figure 3 Age-stratified Prevalence of A) Proton Pump Inhibitor Use and b) Histamine-2  
12 Receptor Antagonist Use  
13  
14  
15 Figure 4 Persistence to Original Treatment Course for Proton Pump Inhibitor and  
16 Histamine-2 Receptor Antagonist Initiators  
17  
18  
19  
20  
21  
22  
23  
24  
25  
26  
27  
28  
29  
30  
31  
32  
33  
34  
35  
36  
37  
38  
39  
40  
41  
42  
43  
44  
45  
46  
47  
48  
49  
50  
51  
52  
53  
54  
55  
56  
57  
58  
59  
60

Figure 1

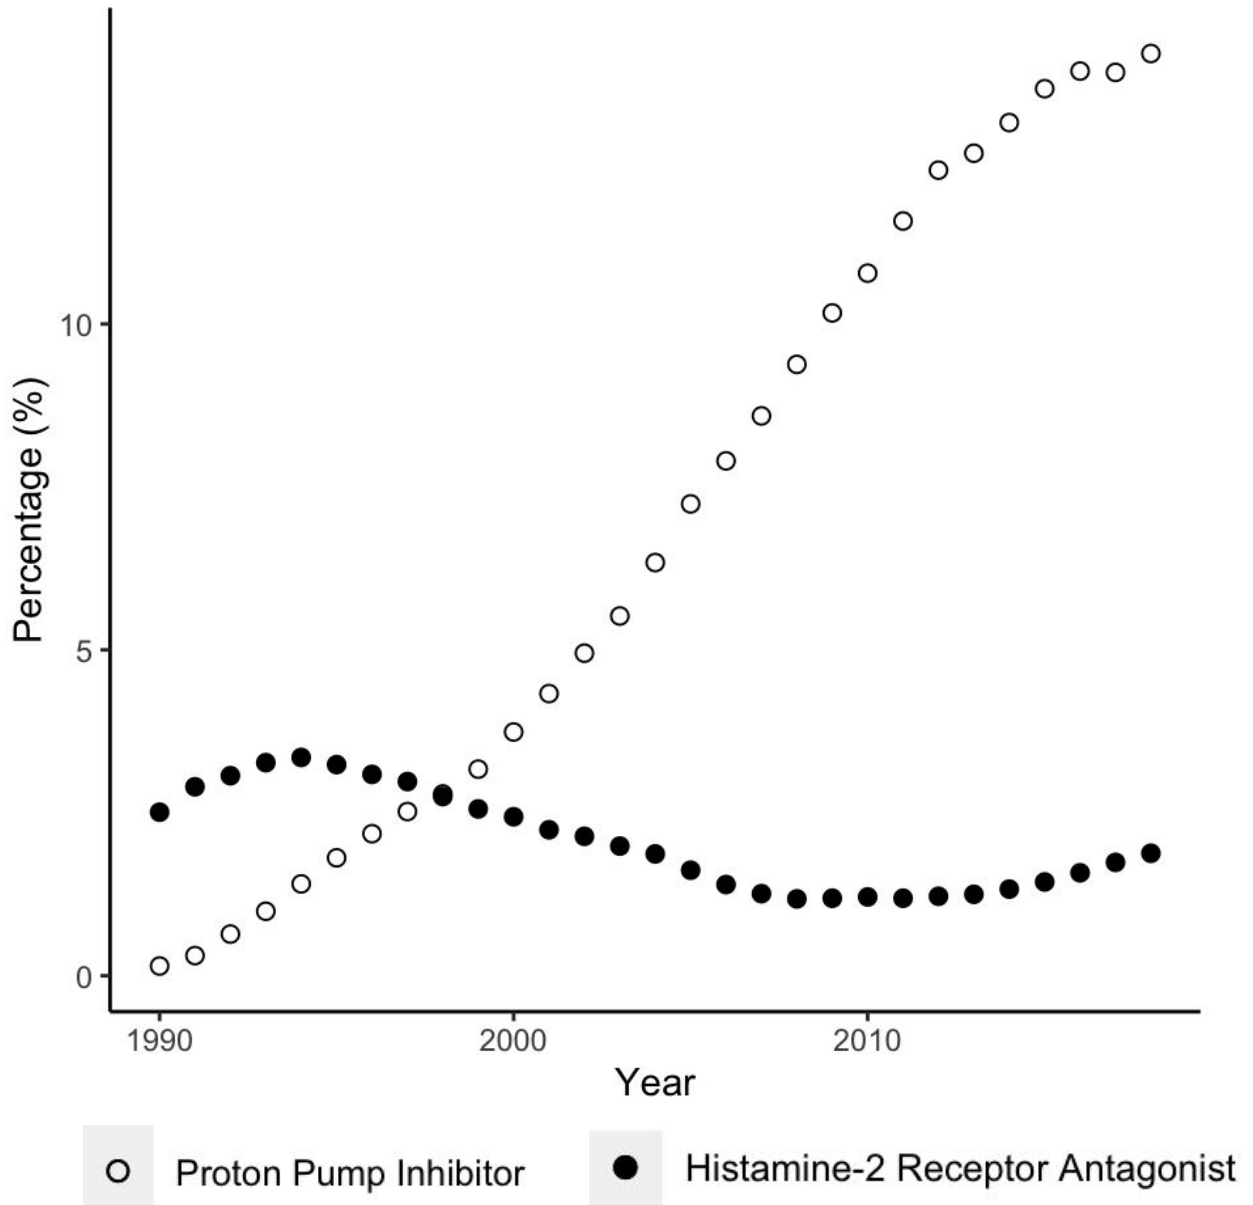

Figure 2

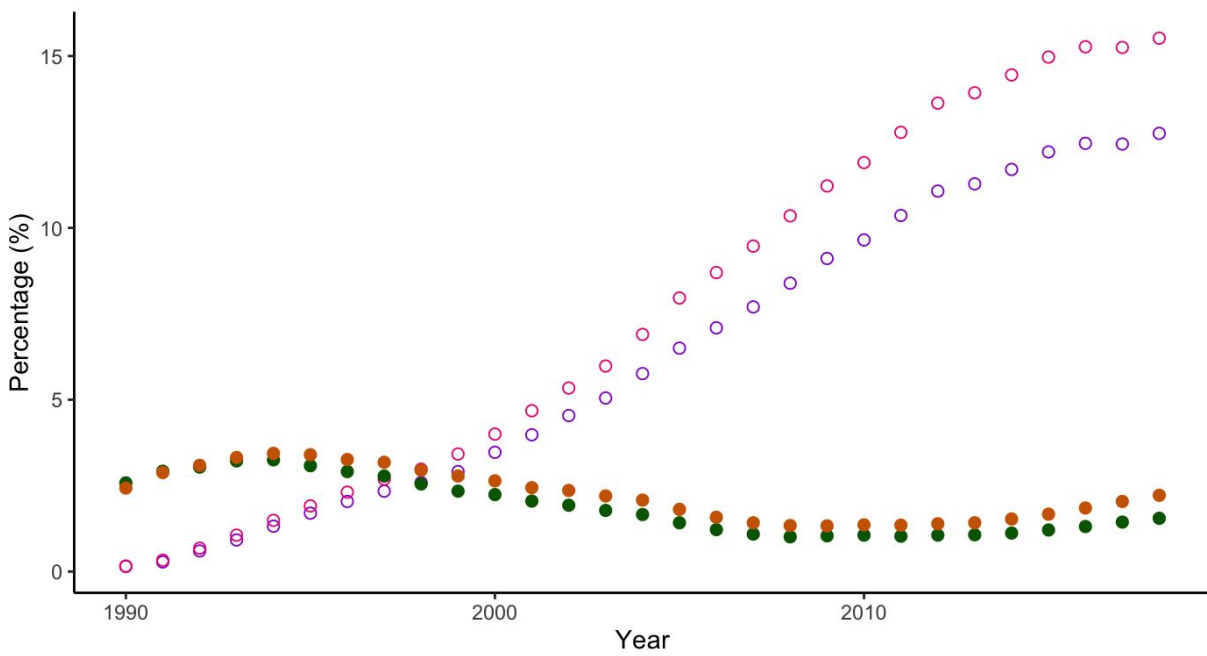

○ Proton Pump Inhibitor Female      ○ Proton Pump Inhibitor Male  
● Histamine-2 Receptor Antagonist Female      ● Histamine-2 Receptor Antagonist Male

view only

Figure 3

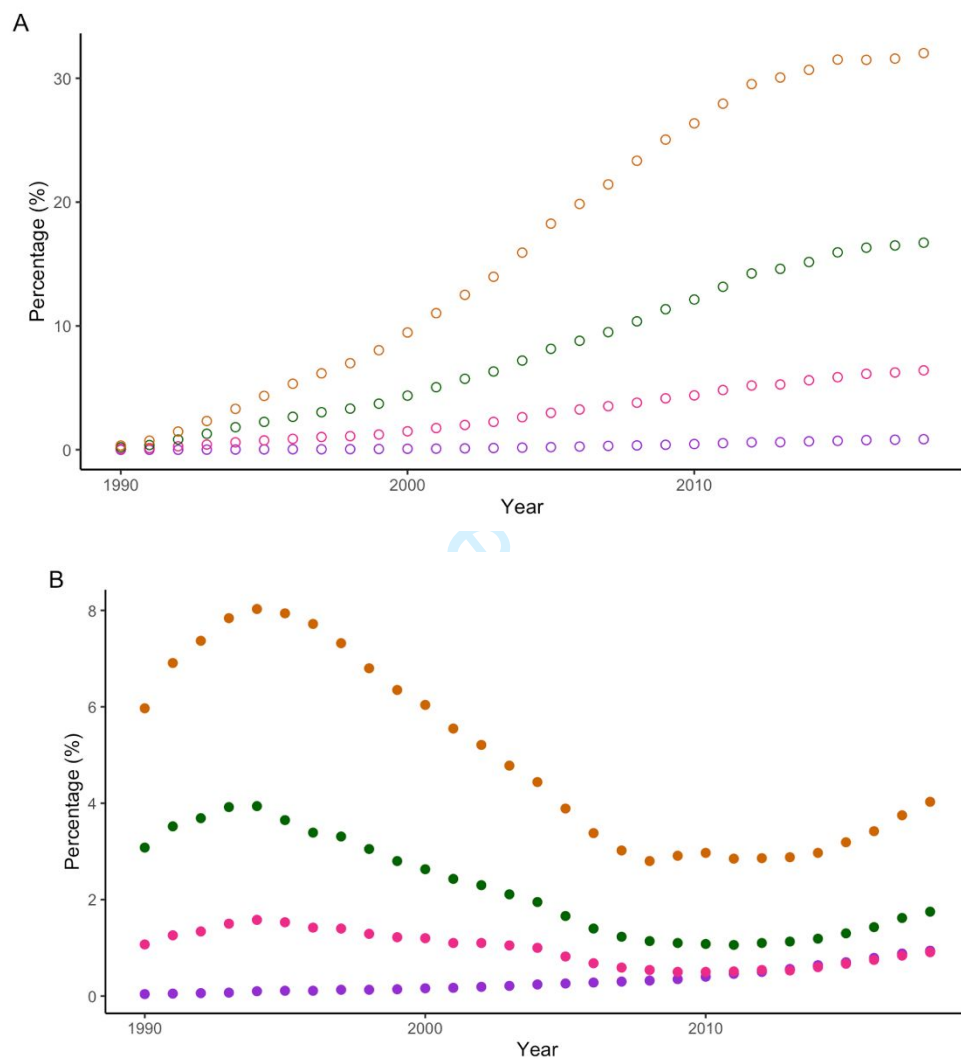

Proton Pump Inhibitor:

- <18 years old
- 18 to 39 years old
- 40 to 59 years old
- 60 years old and above

Histamine-2 Receptor Antagonist:

- <18 years old
- 18 to 39 years old
- 40 to 59 years old
- 60 years old and above

Figure 4

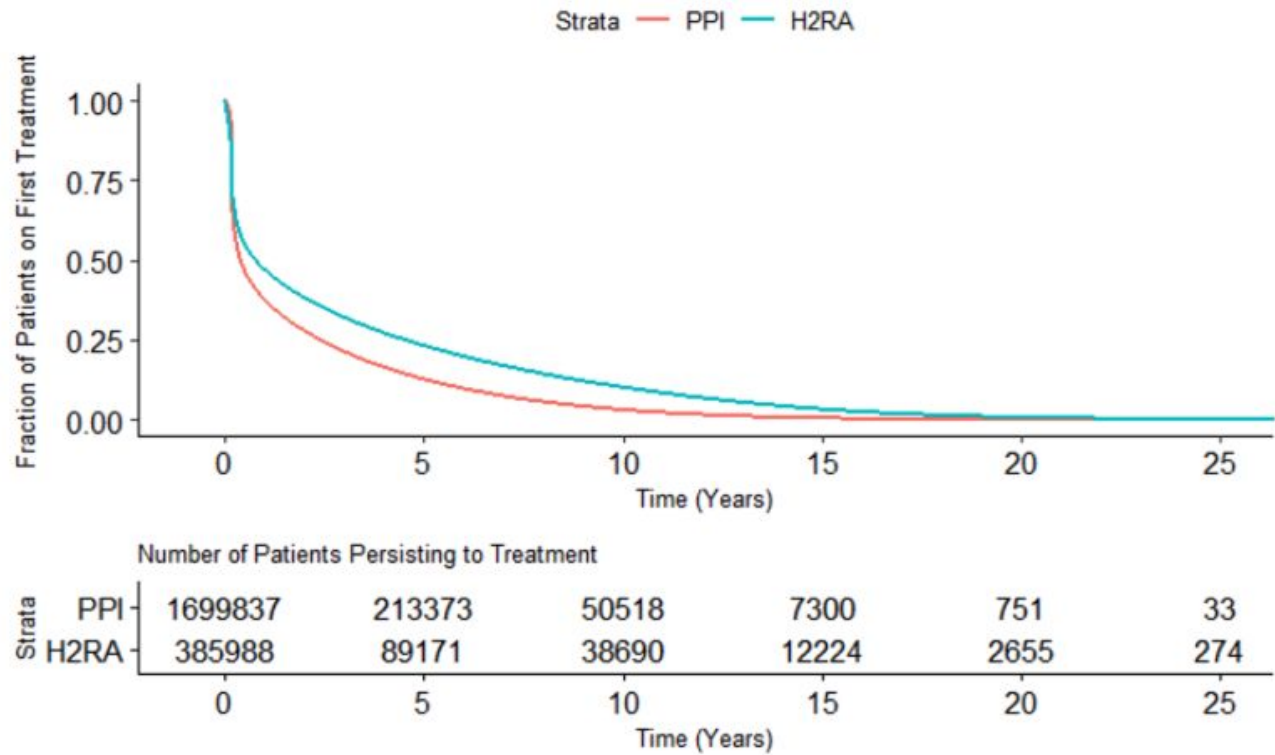

## Table of Contents

|                                                                                                                                                                                         |    |
|-----------------------------------------------------------------------------------------------------------------------------------------------------------------------------------------|----|
| Supplementary Table 1. List of British National Formulary Codes for Proton Pump Inhibitors.....                                                                                         | 2  |
| Supplementary Table 2. List of British National Formulary Codes for Histamine-2 Receptor Antagonists .....                                                                              | 3  |
| Supplementary Table 3. Sex Stratified Indications for Individuals Newly Prescribed Proton Pump Inhibitors and Histamine-2 Receptor Antagonists .....                                    | 4  |
| Supplementary Table 4. Changes in Prescribing Intensity Over 5-Year Intervals for Proton Pump Inhibitors and Histamine-2 Receptor Antagonists .....                                     | 5  |
| Supplementary Table 5. Reason for Discontinuation of Initial Acid Suppressant Treatment Course Under Alternate Grace Periods .....                                                      | 6  |
| Supplementary Figure 1. Incidence of Indications for Proton Pump Inhibitors and Histamine-2 Receptor Antagonists Over Time .....                                                        | 7  |
| Supplementary Figure 2. Overall Prevalence of Proton Pump Inhibitor and Histamine-2 Receptor Antagonist Use in New Users.....                                                           | 8  |
| Supplementary Figure 3. Sex-stratified Prevalence of Proton Pump Inhibitor and Histamine-2 Receptor Antagonist Use in New Users.....                                                    | 9  |
| Supplementary Figure 4. Age-stratified Prevalence of A) Proton Pump Inhibitor Use and b) Histamine-2 Receptor Antagonist Use in New Users .....                                         | 10 |
| Supplementary Figure 5. Prevalence of A) Proton Pump Inhibitor Prescriptions and B) Histamine-2 Receptor Antagonist Prescriptions Stratified by Individual Drug Type .....              | 11 |
| Supplementary Figure 6. Prescribing Intensity of Proton Pump Inhibitors and Histamine-2 Receptor Antagonists .....                                                                      | 12 |
| Supplementary Figure 7. Persistence to Original Treatment Course for Proton Pump Inhibitor and Histamine-2 Receptor Antagonist Initiators with Evidence-based Indications for Use ..... | 13 |
| Supplementary Figure 8. Persistence to Original Treatment Course for Proton Pump Inhibitor and Histamine-2 Receptor Antagonist Initiators with Non-evidence Based Gastroprotection..... | 14 |
| Supplementary Figure 9. Persistence to Original Treatment Course for Proton Pump Inhibitor and Histamine-2 Receptor Antagonist Initiators with Off-label Indications for Use .....      | 15 |
| Supplementary Figure 10. Persistence to Original Treatment Course for Proton Pump Inhibitor and Histamine-2 Receptor Antagonist Initiators with No Recorded Indication for Use.....     | 16 |



---

**Supplementary Table 1. List of British National Formulary Codes for Proton Pump Inhibitors**


---

| British National Formulary Code                           | British National Formulary Header                                                                                                                      |
|-----------------------------------------------------------|--------------------------------------------------------------------------------------------------------------------------------------------------------|
| 01030500/05010103                                         | Proton Pump Inhibitors/Broad-spectrum Penicillins                                                                                                      |
| 01030500/10010100                                         | Proton Pump Inhibitors/Non-steroidal Anti-inflammatory Drugs                                                                                           |
| 01030500/05010500                                         | Proton Pump Inhibitors/Macrolides                                                                                                                      |
| 01030800/05011100/05040200/<br>05040300/05040400/07020251 | Helicobacter Pylori Eradication/Metronidazole And Tinidazole/Amoebicides/Trichomonacides/ Antigiardial Drugs/Preparations For Other Vaginal Infections |
| 1030500                                                   | Proton Pump Inhibitors                                                                                                                                 |

---

**Supplementary Table 2. List of British National Formulary Codes for Histamine-2 Receptor Antagonists**

| <b>British National Formulary Code</b> | <b>British National Formulary Header</b>               |
|----------------------------------------|--------------------------------------------------------|
| 1030100                                | H2 receptor antagonists                                |
| 01030100/01010201                      | H2 receptor antagonists/Alginate preparations          |
| 01030300/01030100                      | Chelates and complexes/H2 receptor antagonists         |
| 01030300/01030100                      | Chelates and complexes/H2 receptor antagonists         |
| 01030100/01010202                      | H2 receptor antagonists/Indigestion remedies           |
| 01010201/01030100                      | Compound Alginate Preparations/H2-Receptor Antagonists |
| 01010202/01030100                      | Indigestion Preparations/H2-Receptor Antagonists       |

Abbreviations: H2, Histamine-2.

**Supplementary Table 3. Sex Stratified Indications for Individuals Newly Prescribed Proton Pump Inhibitors and Histamine-2 Receptor Antagonists**

| Indication                                             | Male           | Female         |
|--------------------------------------------------------|----------------|----------------|
| Proton Pump Inhibitor, n (%)<br>(n = 1,699,837)        | 768,781 (45.2) | 931,056 (54.8) |
| Evidence-based indication, n (%) <sup>§</sup>          | 342,934 (44.6) | 397,243 (42.7) |
| Dyspepsia                                              | 141,072        | 175,759        |
| Gastroprotection                                       | 132,637        | 155,723        |
| Gastro-oesophageal reflux disease                      | 73,683         | 84,722         |
| Peptic ulcer disease                                   | 31,416         | 18,823         |
| Helicobacter pylori infection                          | 19,001         | 22,429         |
| Barrett's oesophagus                                   | 2,724          | 1,456          |
| Zollinger-Ellison syndrome                             | 17             | 7              |
| Non-evidence based gastroprotection, n (%)             | 165,252 (21.5) | 198,740 (21.3) |
| Off-label indication, n (%) <sup>§</sup>               | 97,248 (12.6)  | 156,343 (16.8) |
| Stomach pain                                           | 85,628         | 146,087        |
| Gastritis or duodenitis                                | 17,091         | 18,817         |
| No recorded indication, n (%)                          | 163,347 (21.2) | 178,730 (19.2) |
| Histamine-2 Receptor Antagonists, n (%)<br>(n=385,988) | 167,683 (43.4) | 218,305 (56.6) |
| Evidence-based indication, n (%) <sup>§</sup>          | 77,482 (46.2)  | 97,354 (44.6)  |
| Dyspepsia                                              | 49,650         | 63,087         |
| Gastroprotection                                       | 16,809         | 24,541         |
| Gastro-oesophageal reflux disease                      | 14,151         | 19,329         |
| Peptic ulcer disease                                   | 8,834          | 5,619          |
| Helicobacter pylori infection                          | 1,127          | 1,399          |
| Barrett's oesophagus                                   | 80             | 57             |
| Zollinger-Ellison syndrome                             | S*             | S*             |
| Non-evidence based gastroprotection, n (%)             | 22,644 (13.5)  | 28,832 (13.2)  |
| Off-label indication, n (%) <sup>§</sup>               | 29,227 (17.4)  | 43,204 (19.8)  |
| Stomach pain                                           | 24,765         | 39,423         |
| Gastritis or duodenitis                                | 6,315          | 6,781          |
| No recorded indication, n (%)                          | 38,330 (22.9)  | 48,915 (22.4)  |

<sup>§</sup> Indication categories are not mutually exclusive.

S\* Numbers <5 are not displayed, as per the confidentially practices of the Clinical Practice Research Datalink.

**Supplementary Table 4. Changes in Prescribing Intensity Over 5-Year Intervals for Proton Pump Inhibitors and Histamine-2 Receptor Antagonists**

| <b>Interval</b> | <b>Proton Pump Inhibitor IRR (95% CI)</b> | <b>Histamine-2 Receptor Antagonists IRR (95% CI)</b> |
|-----------------|-------------------------------------------|------------------------------------------------------|
| 1990-1994       | 1.47 (1.39 – 1.54)                        | 0.79 (0.76 – 0.81)                                   |
| 1995-1999       | 1.14 (1.13 – 1.16)                        | 0.90 (0.90 – 0.91)                                   |
| 2000-2004       | 1.07 (1.06 – 1.08)                        | 0.87 (0.87 – 0.87)                                   |
| 2005-2009       | 1.01 (1.01 – 1.01)                        | 0.86 (0.84 – 0.87)                                   |
| 2010-2014       | 0.99 (0.99 – 1.00)                        | 0.97 (0.95 – 0.99)                                   |
| 2015-2018       | 0.97 (0.97 – 0.97)                        | 1.05 (1.05 – 1.05)                                   |

Abbreviations: IRR: Incidence rate ratio; CI: confidence interval.

**Supplementary Table 5. Reason for Discontinuation of Initial Acid Suppressant Treatment Course Under Alternate Grace Periods**

| <b>Reason for Discontinuation</b> | <b>Proton Pump Inhibitors<br/>(n=1,699,837)</b> | <b>Histamine-2 Receptor Antagonists<br/>(n=385,988)</b> |
|-----------------------------------|-------------------------------------------------|---------------------------------------------------------|
| <b>7 Day Grace Period †</b>       |                                                 |                                                         |
| Switch to other class             | 31,818 (1.9)                                    | 111,100 (28.8)                                          |
| Treatment gap > 7 days            | 1,020,369 (60.0)                                | 147,753 (38.3)                                          |
| Administrative Censoring          | 647,650 (38.1)                                  | 127,135 (32.9)                                          |
| <b>60 Day Grace Period ‡</b>      |                                                 |                                                         |
| Switch to other class             | 54,783 (3.2)                                    | 135,039 (35.0)                                          |
| Treatment gap > 60 days           | 778,676 (45.8)                                  | 103,837 (26.9)                                          |
| Administrative Censoring          | 866,378 (51.0)                                  | 147,112 (38.1)                                          |

† median (interquartile range) duration of first treatment course for PPI users and H2RA users was 66 (36 to 560) and 149 (38 to 1,479) days, respectively.

‡ median (interquartile range) duration of first treatment course for PPI users and H2RA users was 231 (89 to 1,097) and 381 (91 to 1,785) days, respectively.

Supplementary Figure 1. Incidence of Indications for Proton Pump Inhibitors and Histamine-2 Receptor Antagonists Over Time

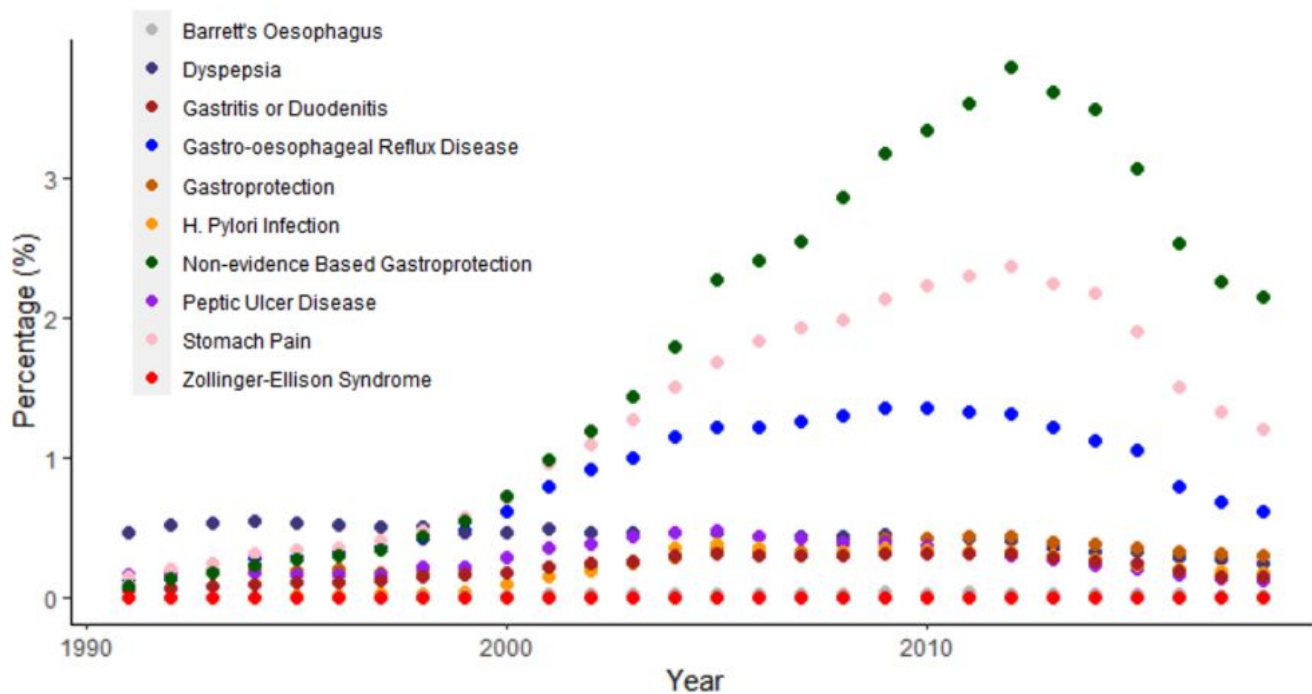

view only

1  
2  
3 **Supplementary Figure 2. Overall Prevalence of Proton Pump Inhibitor and Histamine-2**  
4 **Receptor Antagonist Use in New Users**  
5  
6  
7



**Supplementary Figure 3. Sex-stratified Prevalence of Proton Pump Inhibitor and Histamine-2 Receptor Antagonist Use in New Users**

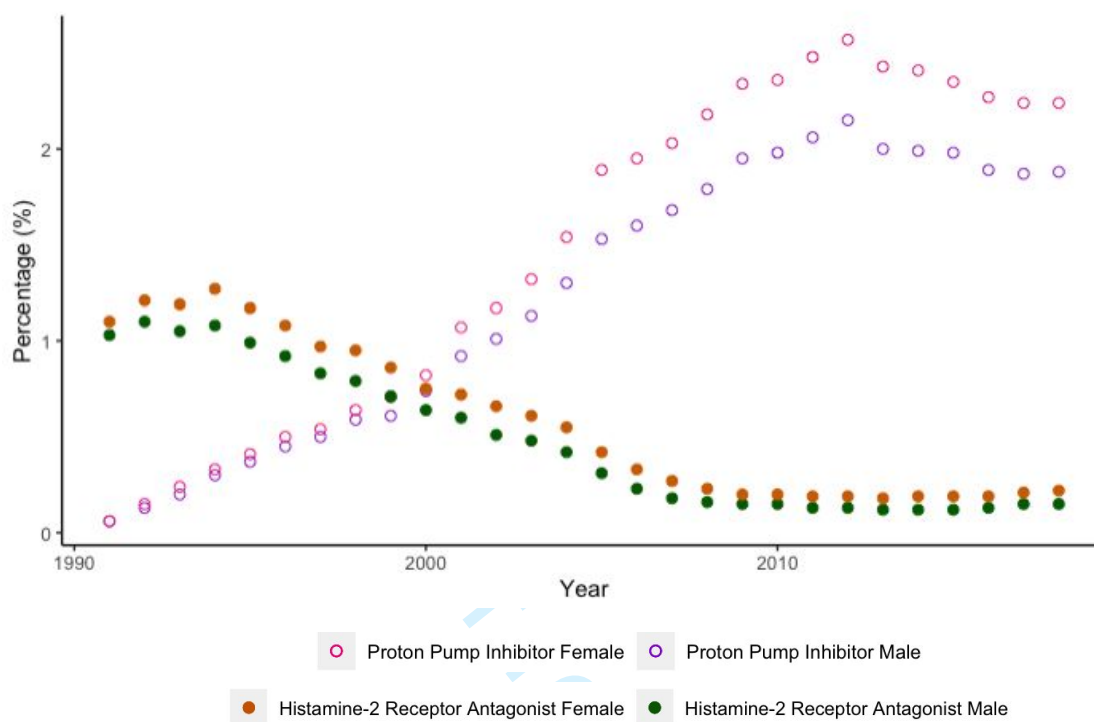



**Supplementary Figure 4. Age-stratified Prevalence of A) Proton Pump Inhibitor Use and b) Histamine-2 Receptor Antagonist Use in New Users**

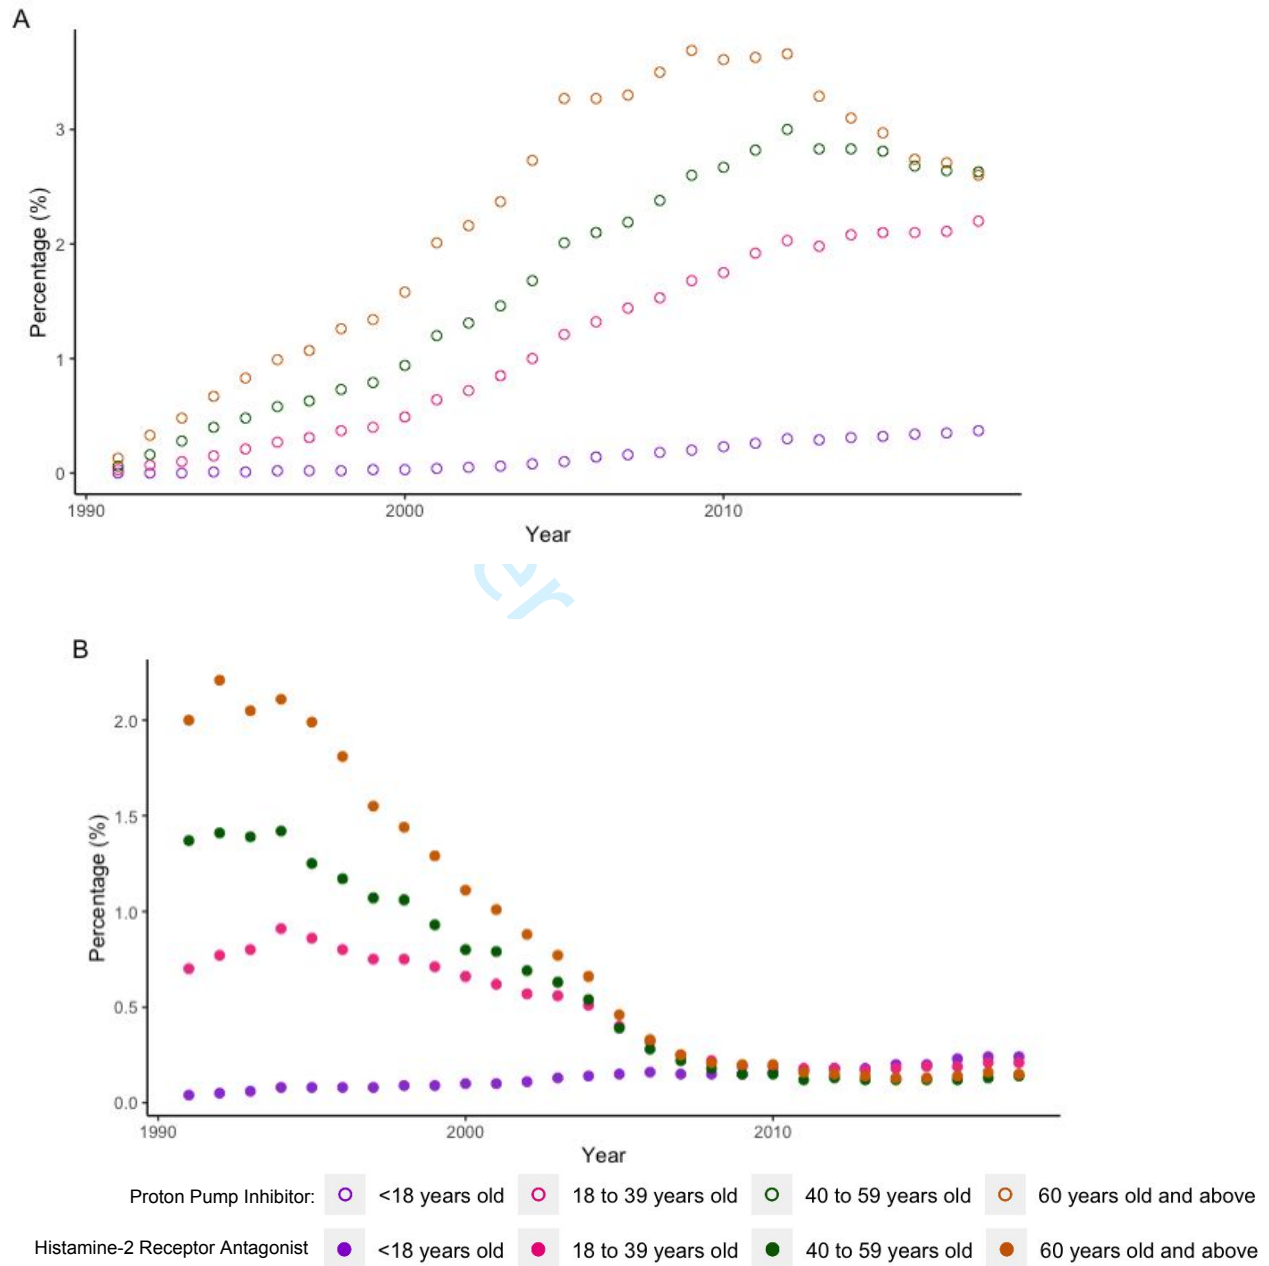

**Supplementary Figure 5. Prevalence of A) Proton Pump Inhibitor Prescriptions and B) Histamine-2 Receptor Antagonist Prescriptions Stratified by Individual Drug Type**



Supplementary Figure 6. Prescribing Intensity of Proton Pump Inhibitors and Histamine-2 Receptor Antagonists

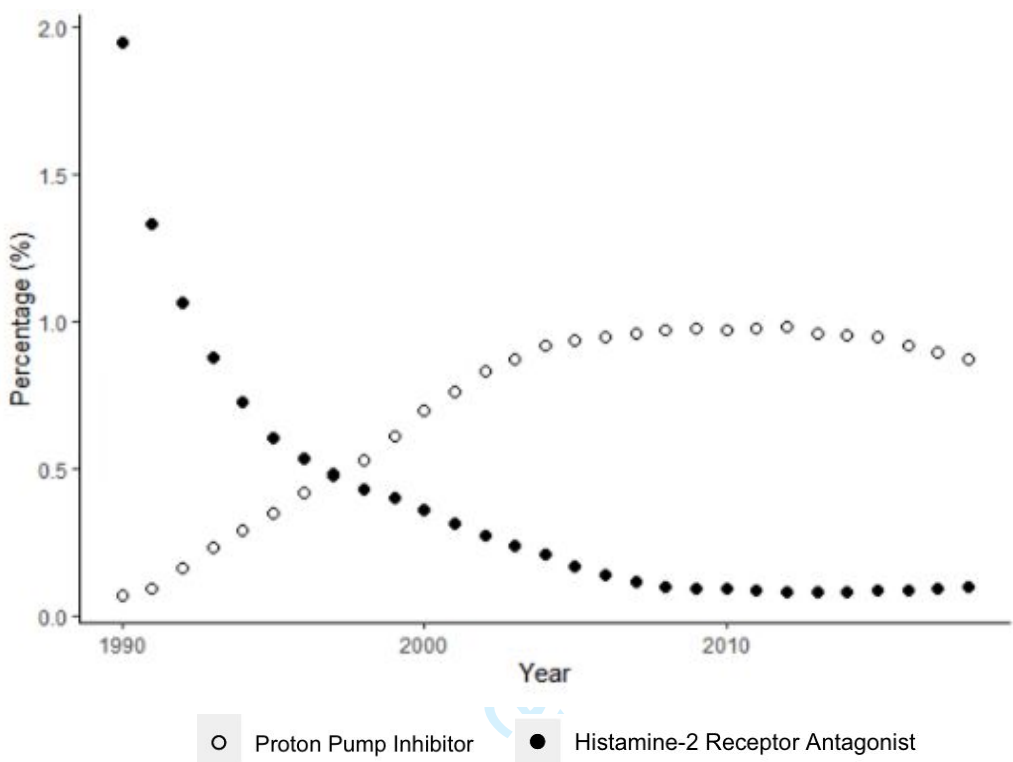

**Supplementary Figure 7. Persistence to Original Treatment Course for Proton Pump Inhibitor and Histamine-2 Receptor Antagonist Initiators with Evidence-based Indications for Use**

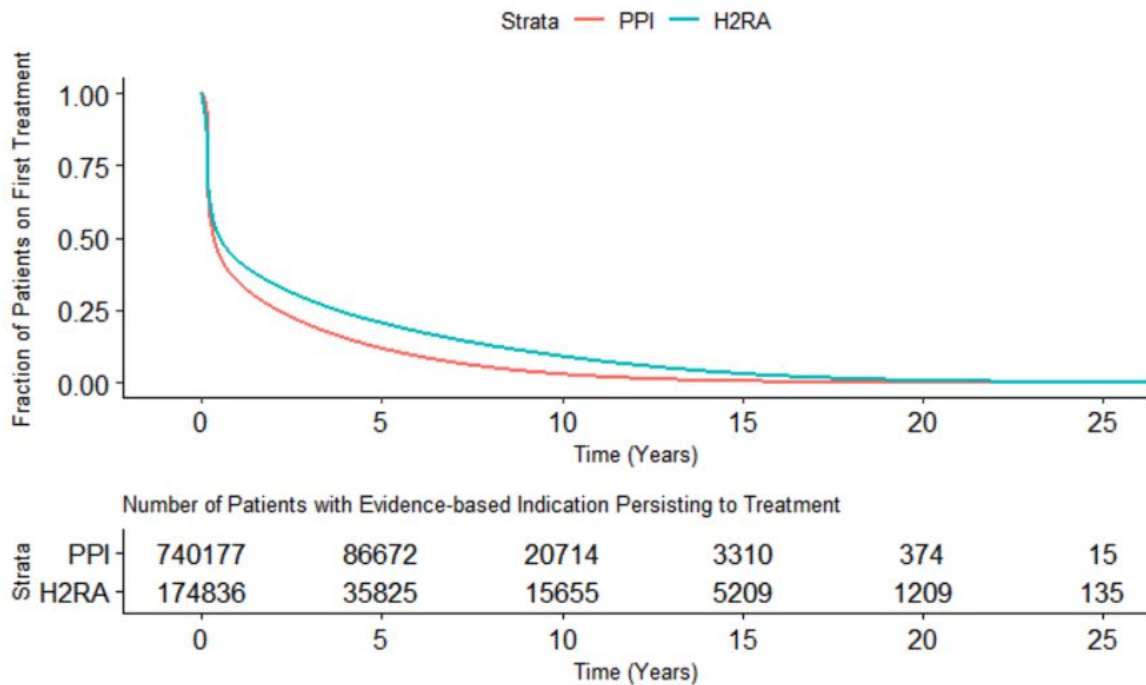

**Supplementary Figure 8. Persistence to Original Treatment Course for Proton Pump Inhibitor and Histamine-2 Receptor Antagonist Initiators with Non-evidence Based Gastroprotection**

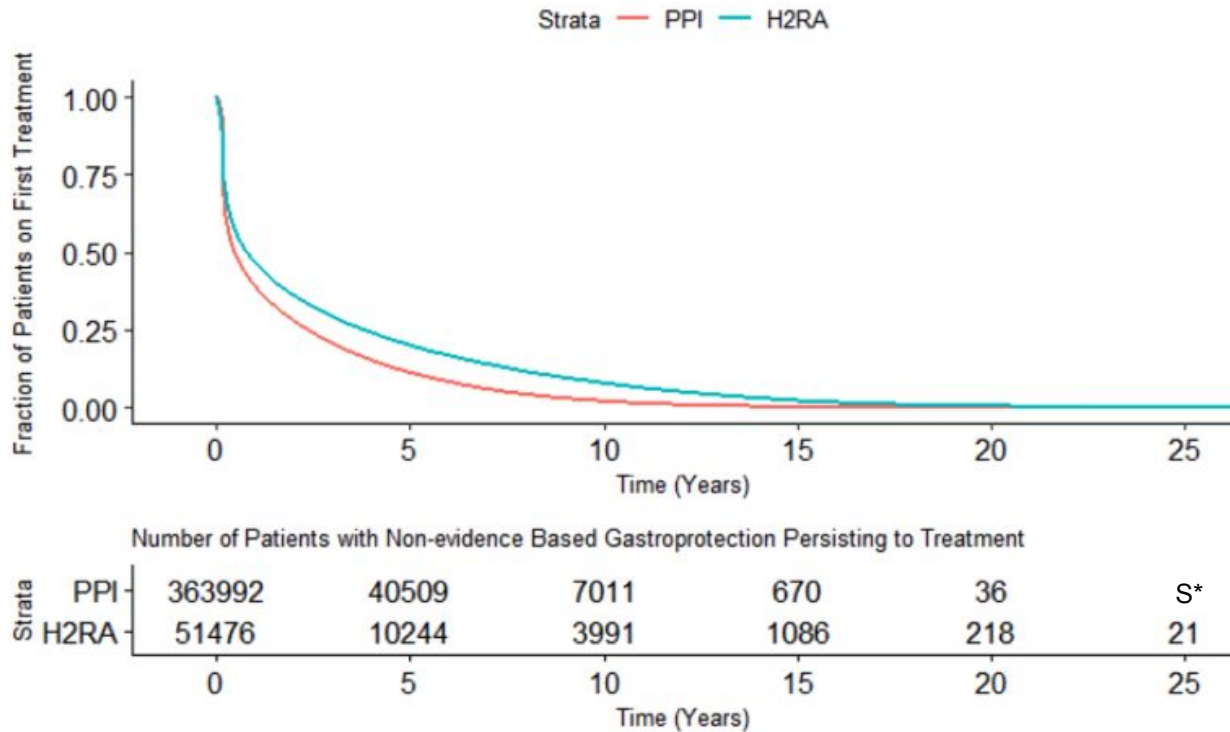

S\* Numbers <5 are not displayed, as per the confidentiality practices of the Clinical Practice Research Datalink.

**Supplementary Figure 9. Persistence to Original Treatment Course for Proton Pump Inhibitor and Histamine-2 Receptor Antagonist Initiators with Off-label Indications for Use**

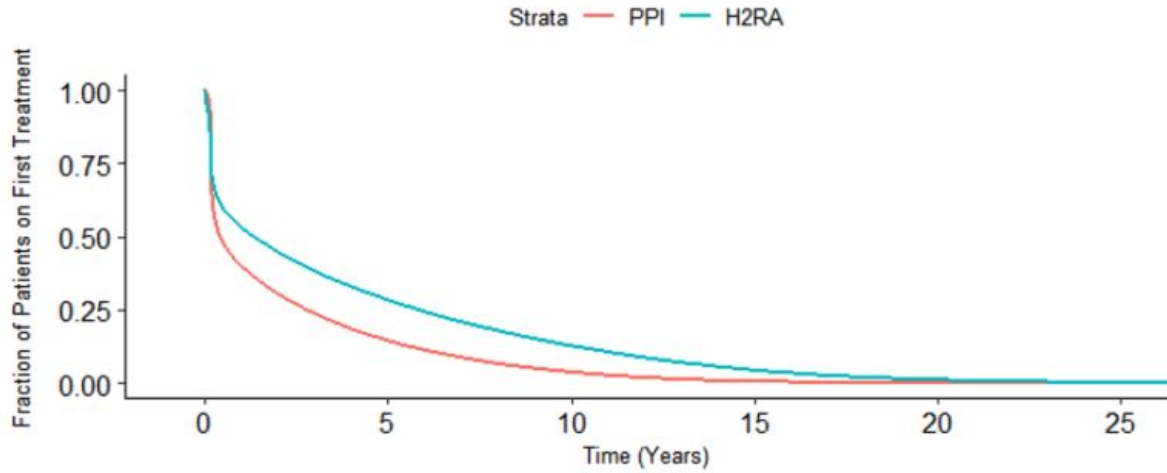

Number of Patients with an Off-label Indication Persisting to Treatment

| Strata |  | 0      | 5     | 10   | 15   | 20  | 25 |
|--------|--|--------|-------|------|------|-----|----|
| PPI    |  | 253591 | 36301 | 9149 | 1332 | 156 | 7  |
| H2RA   |  | 72431  | 20424 | 9119 | 3064 | 739 | 71 |

Time (Years)

view only

**Supplementary Figure 10. Persistence to Original Treatment Course for Proton Pump Inhibitor and Histamine-2 Receptor Antagonist Initiators with No Recorded Indication for Use**

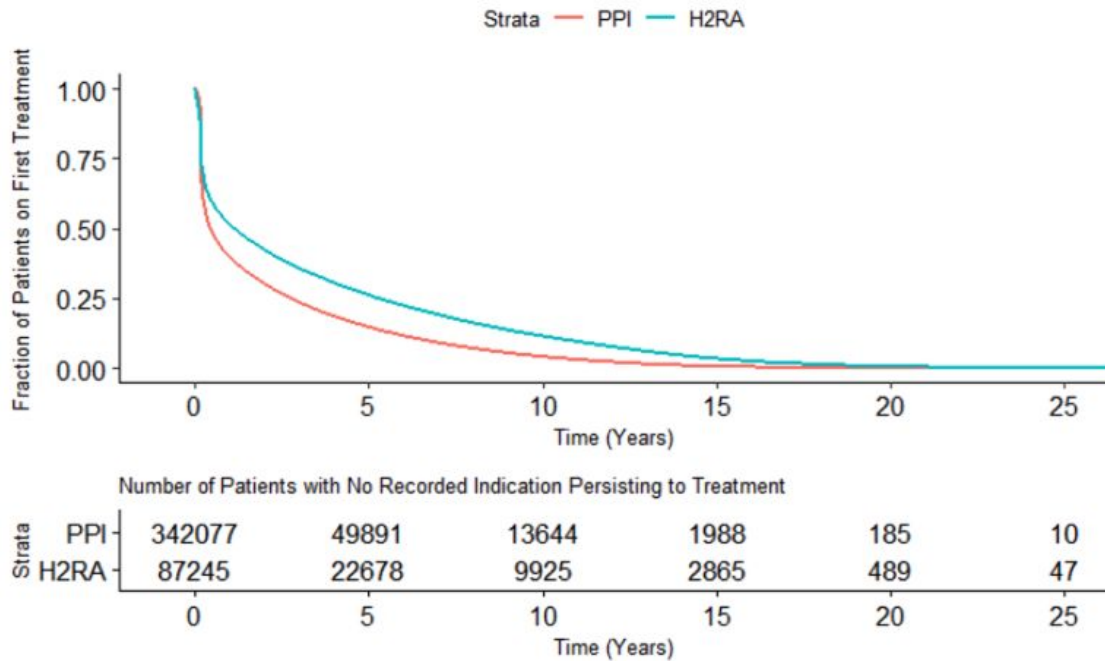

# BMJ Open

## Trends in Acid Suppressant Drug Prescriptions in Primary Care in the United Kingdom: A Population Based Cross Sectional Study

|                                 |                                                                                                                                                                                                                                                                                                                                                                                                                                                                                                                                   |
|---------------------------------|-----------------------------------------------------------------------------------------------------------------------------------------------------------------------------------------------------------------------------------------------------------------------------------------------------------------------------------------------------------------------------------------------------------------------------------------------------------------------------------------------------------------------------------|
| Journal:                        | <i>BMJ Open</i>                                                                                                                                                                                                                                                                                                                                                                                                                                                                                                                   |
| Manuscript ID                   | bmjopen-2020-041529.R2                                                                                                                                                                                                                                                                                                                                                                                                                                                                                                            |
| Article Type:                   | Original research                                                                                                                                                                                                                                                                                                                                                                                                                                                                                                                 |
| Date Submitted by the Author:   | 04-Nov-2020                                                                                                                                                                                                                                                                                                                                                                                                                                                                                                                       |
| Complete List of Authors:       | Abrahami, Devin; Lady Davis Institute for Medical Research, Centre for Clinical Epidemiology; McGill University, Epidemiology, Biostatistics, and Occupational Health<br>McDonald, Emily; McGill University Health Centre, General Internal Medicine; McGill University, Experimental Medicine<br>Schnitzer, Mireille; Université de Montréal, Pharmacy<br>Azoulay, Laurent; Lady Davis Institute for Medical Research, Centre for Clinical Epidemiology; McGill University, Epidemiology, Biostatistics, and Occupational Health |
| <b>Primary Subject Heading</b>: | Epidemiology                                                                                                                                                                                                                                                                                                                                                                                                                                                                                                                      |
| Secondary Subject Heading:      | Gastroenterology and hepatology                                                                                                                                                                                                                                                                                                                                                                                                                                                                                                   |
| Keywords:                       | EPIDEMIOLOGY, Gastrointestinal disease < GASTROENTEROLOGY, PRIMARY CARE                                                                                                                                                                                                                                                                                                                                                                                                                                                           |
|                                 |                                                                                                                                                                                                                                                                                                                                                                                                                                                                                                                                   |

SCHOLARONE™  
Manuscripts





I, the Submitting Author has the right to grant and does grant on behalf of all authors of the Work (as defined in the below author licence), an exclusive licence and/or a non-exclusive licence for contributions from authors who are: i) UK Crown employees; ii) where BMJ has agreed a CC-BY licence shall apply, and/or iii) in accordance with the terms applicable for US Federal Government officers or employees acting as part of their official duties; on a worldwide, perpetual, irrevocable, royalty-free basis to BMJ Publishing Group Ltd ("BMJ") its licensees and where the relevant Journal is co-owned by BMJ to the co-owners of the Journal, to publish the Work in this journal and any other BMJ products and to exploit all rights, as set out in our [licence](#).

The Submitting Author accepts and understands that any supply made under these terms is made by BMJ to the Submitting Author unless you are acting as an employee on behalf of your employer or a postgraduate student of an affiliated institution which is paying any applicable article publishing charge ("APC") for Open Access articles. Where the Submitting Author wishes to make the Work available on an Open Access basis (and intends to pay the relevant APC), the terms of reuse of such Open Access shall be governed by a Creative Commons licence – details of these licences and which [Creative Commons](#) licence will apply to this Work are set out in our licence referred to above.

Other than as permitted in any relevant BMJ Author's Self Archiving Policies, I confirm this Work has not been accepted for publication elsewhere, is not being considered for publication elsewhere and does not duplicate material already published. I confirm all authors consent to publication of this Work and authorise the granting of this licence.

# Trends in Acid Suppressant Drug Prescriptions in Primary Care in the United Kingdom: A Population Based Cross Sectional Study

Devin Abrahami<sup>1,2</sup>, Emily G. McDonald<sup>3,4</sup>, Mireille Schnitzer<sup>5</sup>, Laurent Azoulay<sup>1,2,6</sup>

<sup>1</sup> Centre for Clinical Epidemiology, Lady Davis Institute, Jewish General Hospital, Montreal, Canada

<sup>2</sup> Department of Epidemiology, Biostatistics, and Occupational Health, McGill University, Montreal, Canada

<sup>3</sup> Division of General Internal Medicine, Department of Medicine, McGill University Health Centre

<sup>4</sup> Division of Experimental Medicine, McGill University, Montreal Canada

<sup>5</sup> Faculty of Pharmacy, Université de Montréal, Montréal, Québec, Canada

<sup>6</sup> Gerald Bronfman Department of Oncology, McGill University, Montreal, Canada

**Abstract Word Count:** 263

**Word count:** 3,576

## Address for correspondence:

Dr Laurent Azoulay

Centre for Clinical Epidemiology, Lady Davis Institute, Jewish General Hospital

3755 Cote Sainte-Catherine Road, H425.1

Montreal, Quebec, Canada H3T 1E2

Telephone: (514) 340-8222 Ext. 28396

Fax: (514) 340-7564

Email: laurent.azoulay@mcgill.ca

November 4, 2020

## ABSTRACT

**Objective:** To examine proton pump inhibitors (PPI) and histamine-2 receptor antagonists (H2RA) prescribing patterns over a 29-year period by quantifying annual prevalence and prescribing intensity over time.

**Design:** Population based cross sectional study.

**Setting:** More than 700 general practices contributing data to the United Kingdom Clinical Practice Research Datalink.

**Participants:** Within a cohort of 14,242,329 patients registered in the Clinical Practice Research Datalink, 3,027,383 patients were prescribed at least one PPI or H2RA from January 1, 1990 to December 31, 2018.

**Primary and Secondary Outcome Measures:** Annual prescription rates were estimated by dividing the number of patients prescribed a PPI or H2RA by the total Clinical Practice Research Datalink population. Change in prescribing intensity (number of prescriptions per year divided by person-years of follow-up) was calculated using negative binomial regression.

**Results:** From 1990 to 2018, 21.3% of the CPRD population was exposed to at least one acid suppressant drug. During that period, PPI prevalence increased from 0.2-14.2%, while H2RA prevalence remained low (range: 1.2-3.4%). Yearly prescribing intensity to PPIs increased during the first 15 years of the study period but remained relatively constant for the remainder of the study period. In contrast, yearly prescribing intensity of H2RAs decreased from 1990 to 2009 but has begun to slightly increase over the past five years.

**Conclusions:** While PPI prevalence has been increasing over time, its prescribing intensity has recently plateaued. Notwithstanding their efficacy, PPIs are associated with a number of adverse

1  
2  
3 effects not attributed to H2RAs, whose prescribing intensity has begun to increase. Thus, H2RAs  
4 remain a valuable treatment option for individuals with gastric conditions.  
5  
6  
7  
8  
9

## 10 **STRENGTHS AND LIMITATIONS OF THIS STUDY**

- 11 - Largest and most comprehensive study to date describing trends of acid suppressant drugs  
12 over a 29-year period
- 13 - Large sample size allows detailed description of trends by age group, sex and indication
- 14 - Prescriptions in the Clinical Practice Research Datalink are issued by general practitioners,  
15 so it was not possible to assess patient adherence
- 16 - We did not have data on prescriptions recorded in hospital, by specialists, or from over the  
17 counter  
18  
19  
20  
21  
22  
23  
24  
25  
26  
27  
28  
29

30 **Funding Statement:** This study was funded by a Foundation Scheme Grant from the Canadian  
31 Institutes of Health Research (FDN-143328). The sponsor had no influence on design and conduct  
32 of the study; collection, management, analysis, and interpretation of the data; and preparation,  
33 review, or approval of the manuscript. DA is the recipient of a Vanier Canada Graduate  
34 Scholarship from the Canadian Institutes of Health Research. EGM receives Salary support from  
35 the Fonds de Recherche du Québec – Santé. MS holds a New Investigator Salary Award from the  
36 Canadian Institutes of Health Research and is the recipient of the Canadian Institutes of Health  
37 Research Canada Research Chair, tier 2. LA holds a Chercheur-Boursier Senior award from the  
38 Fonds de Recherche du Québec – Santé and is the recipient of a William Dawson Scholar Award  
39 from McGill University.  
40  
41  
42  
43  
44  
45  
46  
47  
48  
49  
50  
51  
52  
53  
54  
55  
56  
57  
58  
59  
60

1  
2  
3 **Competing Interests Statement:** The authors have no conflicts of interest to disclose.  
4  
5  
6

7  
8 **Author Contributions:** DA, EGM, MS and LA conceived and designed the study. LA acquired  
9  
10 the data. DA and LA did the statistical analyses. DA, EGM, MS and LA analysed and interpreted  
11  
12 the data. DA wrote the manuscript and all EGM, MS and LA critically revised the manuscript.  
13  
14 LA supervised the study and is the guarantor. DA, EGM, MS and LA approved the final version  
15  
16 of the manuscript and agree to be accountable for the accuracy of the work.  
17  
18  
19  
20

21 **Data Sharing:** No data are available.  
22  
23  
24  
25  
26  
27  
28  
29  
30  
31  
32  
33  
34  
35  
36  
37  
38  
39  
40  
41  
42  
43  
44  
45  
46  
47  
48  
49  
50  
51  
52  
53  
54  
55  
56  
57  
58  
59  
60

## INTRODUCTION

Proton pump inhibitors (PPIs) and histamine 2 receptor antagonists (H2RAs) are acid suppressant drugs used in the management of gastric conditions, including peptic ulcer disease and gastro-oesophageal reflux disease.<sup>1 2</sup> The first H2RA, cimetidine, was approved for use in the United Kingdom (UK) in 1976, while omeprazole, a PPI, was later approved in 1989.<sup>3 4</sup> While both drug classes have been used for over three decades, PPIs have been shown to have superior efficacy in reducing stomach acid compared to H2RAs<sup>1</sup> and are thus more favourably used. Nonetheless, both drug classes are among the top 25 most prescribed medications in the hospital setting in the UK.<sup>5</sup>

In recent years, there have been concerns about the increasing uptake of PPIs, with emerging evidence that they are being prescribed to individuals without an evidence-based indication or for longer durations than necessary.<sup>6-10</sup> Indeed, the number of individuals using PPIs has been increasing significantly since their introduction in 1988.<sup>11</sup> In England alone, more than 50 million PPI prescriptions were dispensed in 2015.<sup>3</sup> In contrast, there is limited information on the older drug class, H2RAs, with regards to their prescribing patterns in recent years. It is also less well known whether H2RAs are also being overprescribed in a similar fashion to PPIs.

While PPIs are generally well tolerated and perceived to have an excellent safety profile,<sup>1</sup> recent evidence suggests that long-term use, beyond the recommended 4-8 week duration for most conditions, may be associated with certain adverse health outcomes. These include enteric infections such as *Clostridium difficile*, acute interstitial nephritis, hypomagnesemia and increased intestinal colonization with multidrug resistant organisms.<sup>3 12-15</sup> Given their widespread use and these potential adverse effects, the National Institute for Health and Care Excellence (NICE) recommended new treatment guidelines for PPI use in primary care in 2014.<sup>16</sup> These new

1  
2  
3 guidelines emphasize an annual review to determine ongoing need, and to use the lowest dose of  
4  
5 PPI on an as-needed basis for symptom relief.<sup>16</sup> Treatment with H2RAs is recommended when  
6  
7 patients are unresponsive to PPIs.<sup>16</sup> Prescribing patterns of PPIs have not been evaluated since the  
8  
9 publication of these guidelines, and it remains unknown if the guidelines had an impact on the  
10  
11 uptake of H2RAs. Thus, the objective of this utilization study was to determine the prescribing  
12  
13 patterns of PPIs and H2RAs in UK primary care over a 29-year period.  
14  
15  
16  
17  
18  
19  
20  
21  
22  
23  
24  
25  
26  
27  
28  
29  
30  
31  
32  
33  
34  
35  
36  
37  
38  
39  
40  
41  
42  
43  
44  
45  
46  
47  
48  
49  
50  
51  
52  
53  
54  
55  
56  
57  
58  
59  
60

For peer review only

## METHODS

### *Data Source*

This study was conducted using the Clinical Practice Research Datalink (CPRD), a large primary care database with records of over 15 million patients, shown to be well representative of the general UK population.<sup>17 18</sup> The CPRD contains information on demographics, diagnoses and procedures,<sup>19</sup> and prescriptions issued by general practitioners are recorded using the British National Formulary. The data are audited regularly, and diagnoses recorded in the CPRD have been extensively validated.<sup>20 21</sup>

The study protocol was approved by the Independent Scientific Advisory Committee of the CPRD (protocol number 19\_119RA) and by the Research Ethics Board of the Jewish General Hospital. All authors had access to the study data and reviewed and approved the final manuscript.

### *Study Population*

Using the CPRD, we identified a cohort of patients who were registered with a general practitioner from January 1, 1990 to December 31, 2018. We did not impose any age restrictions to allow the evaluation of PPI and H2RA prescribing trends in both paediatric and adult populations. Patients were followed from the latest date at which their practice started contributing data to the CPRD, their personal date of registration with their general practice, or the start of the study period (January 1, 1990). Follow-up ended at the earliest date at which their practice stopped contributing data to the CPRD, their personal end of registration with their general practice, or the end of the study period (December 31, 2018).



### *Exposure Definition*

We identified all PPIs and H2RAs prescriptions within the study period using the British National Formulary (**Supplementary Tables 1 and 2**). This included five PPI types (omeprazole, esomeprazole, lansoprazole, pantoprazole, and rabeprazole) and four H2RA types (ranitidine, cimetidine, famotidine, and nizatidine). Prescription duration was calculated using the number of days' supply recorded in the CPRD. If this value was not recorded, we divided the prescription quantity by the numeric daily dose to ascertain duration. If none of these variables were recorded, we used the mode of the prescription duration for PPIs and H2RAs, separately.

### *Statistical Analysis*

#### *Prevalence*

For each calendar year, we calculated the prevalence of PPIs and H2RAs, separately. The numerator for these prescription rates was the number of individuals receiving either at least one acid suppressant drug in a given year (PPI and H2RA prescriptions were considered separately). The denominator was the total number of patients registered in the CPRD in a given year. Thus, prevalence was calculated per year by dividing the number of prescriptions over the number of patients in the CPRD for each calendar year between 1990 and 2018. Secondary analyses were conducted to determine prevalence among certain subgroups. Specifically, the rates were stratified by age ( $\leq 18$ , 19-39, 40-59,  $\geq 60$ ), sex, and individual drug type.

Prevalence was also calculated among new users only by restricting the population to individuals receiving their first acid suppressant prescription (i.e. PPI or H2RA) within the study period. To determine new use, individuals prescribed acid suppressants were required to have at least one year of medical history in the CPRD prior to their first prescription. Similarly, patients

1  
2  
3 in the CPRD were required to have at least one year of follow-up to contribute to the denominator.  
4  
5 Individuals co-prescribed a PPI and H2RA as their first prescription were excluded from this  
6  
7 analysis. Thus, prevalence was calculated for each year between 1991 and 2018 in new users and  
8  
9 stratified according to the same variables described above.  
10  
11  
12  
13

### 14 *Indications for use*

15  
16  
17 Indications for use among new users (i.e. first of either a PPI or H2RA prescription within  
18  
19 the study period) was inferred using Read codes recorded at any time prior to the first prescription.  
20  
21 Indications were classified as evidence-based (dyspepsia, gastroprotection, gastro-oesophageal  
22  
23 reflux disease, peptic ulcer disease, Helicobacter pylori infection, Barrett's oesophagus, and  
24  
25 Zollinger-Ellison syndrome), non-evidence based gastroprotection, off-label (stomach pain and  
26  
27 gastritis or duodenitis), and no recorded indication.<sup>2</sup> To define individuals using acid suppressant  
28  
29 drugs for gastroprotection, we considered individuals prescribed NSAIDs or dual antiplatelet  
30  
31 therapy within 90 days prior to their first PPI or H2RA prescription. To be classified as evidence-  
32  
33 based gastroprotection, these patients additionally required at least one of the following risk factors  
34  
35 (age  $\geq 60$ , history of bleed or ulcer, or concomitant use of anticoagulants, antiplatelets,  
36  
37 corticosteroids).<sup>2</sup> All individuals with a co-prescription for NSAIDs or dual antiplatelet therapy,  
38  
39 but without a risk factor, were assumed to be using acid suppressants for non-evidence based  
40  
41 gastroprotection. In secondary analyses, we stratified indications by sex and illustrated the  
42  
43 incidence of indications over time by dividing the number of patients with each indication per year  
44  
45 by the population in the CPRD with at least one year of follow-up.  
46  
47  
48  
49  
50  
51  
52  
53  
54  
55  
56  
57  
58  
59  
60

### *Prescribing Intensity*

For each calendar year, we calculated the prescribing intensity of PPI and H2RA use, separately. The numerator for these rates was the number of prescriptions received for either acid suppressant drug in a given year (prescriptions longer than 30 days were converted into 30-day equivalents [e.g. one 90-day prescription was equivalent to three 30-day prescriptions], for a maximum of 12 prescriptions per year). The denominator for these rates was the total person-years of follow-up that were contributed by drug users in a given year. Thus, yearly prescribing incidence rates based were calculated by dividing the number of prescriptions over the person-years of follow-up for each year between 1990 and 2018. To determine whether prescribing intensity changed during the study period, we stratified the study period by five-year intervals and estimated incident rate ratios (IRRs) with 95% CIs using negative binomial regression, with log of follow-up time included as an offset variable.

### *Persistence*

As there is some evidence that PPIs are being used for inappropriate durations,<sup>6-10</sup> but there is limited evidence on H2RA use, we examined persistence to both drugs by calculating the cumulative incidence of discontinuation in new users of PPIs and H2RAs. Time to discontinuation was defined as the time from the first prescription of an acid suppressant drug to the end of the first treatment episode. Exposure was considered continuous if the duration of one prescription overlapped with the start of the subsequent prescription, allowing for a 30-day grace period. The end of a treatment episode was defined as the first of: 1) a treatment gap exceeding 30 days, 2) a switch from PPI to H2RA or vice versa, or 3) administrative censoring (i.e. if a practice stopped contributing data to the CPRD, a patient was no longer registered with their general practice, or if

1  
2  
3 the study period ended). The length of the grace period was changed to 7 and 60 days in a  
4 sensitivity analysis. We used Kaplan-Meier curves to illustrate the cumulative incidence of  
5 discontinuation of PPIs and H2RAs, separately, as a function of duration of use to show the  
6 cumulative probability of persisting to the first treatment episode. In a secondary analysis, we  
7 described the cumulative incidence of discontinuation according to indications for use (evidence-  
8 based, non-evidence based gastroprotection, off-label, and no recorded indication). All analyses  
9 described above were conducted with SAS version 9.4 (SAS institute, Cary, NC) and R (R  
10 Foundation for Statistical Computing, Vienna, Austria).  
11  
12  
13  
14  
15  
16  
17  
18  
19  
20  
21  
22  
23

#### 24 *Patient Involvement*

25  
26 We did not include patients as study participants, as our study involved the use of secondary  
27 data. Patients were not involved in the design or implementation of the study. We do not plan to  
28 involve patients in the dissemination of results, nor will we disseminate results directly to patients.  
29  
30  
31  
32  
33  
34  
35  
36  
37  
38  
39  
40  
41  
42  
43  
44  
45  
46  
47  
48  
49  
50  
51  
52  
53  
54  
55  
56  
57  
58  
59  
60

## RESULTS

Within a cohort of 14,242,329 patients (51.4% female) registered in the CPRD, 3,027,383 (21.3%) patients were prescribed at least one PPI or H2RA during the study period, corresponding to 58,926,373 and 9,386,908 prescriptions, respectively. Among patients prescribed an acid suppressant drug, there were 1,654,323 (54.7%) females and 2,920,176 (96.5%) adults (at least 18 years old). Throughout follow-up, there were 2,714,785 (19.1%) individuals prescribed at least one PPI, 855,248 (6.0%) individuals prescribed at least one H2RA, and 542,650 (3.8%) individuals prescribed both drug classes.

Among patients newly-prescribed an acid suppressant drug (n=2,085,825), 81.5% (n=1,699,837) were initially prescribed a PPI, while 18.5% (n=385,988) were initially prescribed a H2RA. **Table 1** presents the characteristics of these users at the time of their first prescription. PPI users were slightly older than H2RA users at the time of initial prescription, but there were no sex differences between the two groups. Only 43.5% and 45.3% of PPI and H2RA users, respectively, had an evidence-based indication for use, with dyspepsia being the most common recorded indication. Non-evidence based gastroprotection was more common in PPI users (21.4%) than the H2RA users (13.3%). About one in five PPI and H2RA users did not have a recorded indication for use. When stratifying indications by sex, females were more commonly prescribed PPIs for off-label indications compared to males (**Supplementary Table 3**). The incidence of indications for acid suppressant use was relatively consistent over time, with gastro-oesophageal reflux disease the only evidence-based indication that slightly increased over follow-up (**Supplementary Figure 1**).

**Figures 1 to 3** illustrate the overall, sex and age-stratified prevalence of PPI and H2RA, respectively. Throughout follow-up, PPI prevalence sharply increased from 0.2% in 1990 to 14.2%

1  
2  
3 in 2018. In contrast, the prevalence of H2RAs remained consistently low throughout the study  
4 period (range: 1.2 to 3.4%). PPIs were more commonly prescribed in females and both drug classes  
5 were more commonly prescribed in adults at least 60 years old. Overall and sex-stratified  
6 prevalence of use were similar among new users (**Supplementary Figures 2 and 3**), though the  
7 prevalence of H2RA use among new users was consistent across all age categories over the past  
8 decade (**Supplementary Figure 4**). Omeprazole was the most commonly prescribed PPI during  
9 the study period, followed by lansoprazole (**Supplementary Figure 5**). At the beginning of the  
10 study period, ranitidine and cimetidine were both frequently prescribed, though after 2004  
11 ranitidine was almost exclusively the only H2RA prescribed (**Supplementary Figure 5**).

12  
13  
14  
15  
16  
17  
18  
19  
20  
21  
22  
23  
24 Throughout the study period, the prescribing intensity of PPIs ranged from 0.07% in 1990,  
25 increasing to a peak intensity of 0.98% in 2012. In contrast, the prescribing intensity of H2RA use  
26 decreased over the study period from the highest intensity of 1.95% in 1990, to the lowest intensity  
27 of 0.08% in 2013 (**Supplementary Figure 6**). PPI yearly prescribing intensity sharply increased  
28 during the first 5 years of the study period, moderately increased until 2004, after which  
29 prescribing intensity plateaued (**Supplementary Table 4**). In contrast, H2RA yearly prescribing  
30 intensity decreased from 1990 to 2009, and has begun to increase slightly over the past five years.

31  
32  
33  
34  
35  
36  
37  
38  
39  
40 Within new users of PPIs (n=1,699,837) the median duration of the first treatment course  
41 was 144 (interquartile range [IQR]: 59 to 870) days. Reasons for discontinuation are presented in  
42 **Table 1**, which illustrates that the majority of PPI users (52.5%) discontinued their first treatment  
43 course due to a gap of at least 30 days between prescriptions. Overall, a small percentage (2.1%)  
44 of PPI users discontinued their original treatment due to a switch to H2RAs. In contrast, the median  
45 duration of the first H2RA treatment course among new H2RA users (n=385,988) was 279 (IQR:  
46 61 to 1,645) days. Approximately one-third of H2RA users discontinued use due to each of the

1  
2  
3 following: a treatment gap exceeding 30 days, administrative censoring, or because of a switch to  
4 a PPI. **Supplementary Table 5** presents duration of treatment and reasons for discontinuation  
5 under alternate grace periods. When a grace period of 7 days was applied, the median (IQR)  
6 duration of PPI and H2RA use was 66 (36 to 560) and 149 (38 to 1,479) days, respectively. When  
7 a grace period of 60 days was used, the median (IQR) duration of PPI use was 231 (89 to 1,097)  
8 days, and H2RA use was 381 (91 to 1,785) days. The reasons for discontinuation remained  
9 consistent when considering these alternate grace periods.  
10  
11  
12  
13  
14  
15  
16  
17  
18

19 **Figure 4** illustrates the time to discontinuation of both drug classes. While persistence to  
20 PPIs and H2RAs declined within the first year of use, 37.5% of PPI users and 46.9% of H2RA  
21 users persisted to their original treatment course beyond the one-year recommended duration,<sup>16</sup>  
22 and 12.6% of PPI users and 23.1% of H2RA users persisted to their original treatment course after  
23 5 years. When examining persistence by indication, persistence to both PPIs and H2RAs was  
24 highest among patients with an off-label or no recorded indication for use (**Supplementary**  
25 **Figures 7 to 10**).  
26  
27  
28  
29  
30  
31  
32  
33  
34  
35  
36  
37  
38  
39  
40  
41  
42  
43  
44  
45  
46  
47  
48  
49  
50  
51  
52  
53  
54  
55  
56  
57  
58  
59  
60

## DISCUSSION

To our knowledge, this is the largest and most comprehensive study conducted to date to examine prescribing patterns of both PPIs and H2RAs in the UK. Throughout the study period, 21.3% of the CPRD population received at least one prescription for an acid suppressant drug (PPI only: 19.1%, H2RA only: 6%, PPI and H2RA: 3.8%). The overall prevalence of PPI prescribing has increased from 1990 to 2018, while the prevalence of H2RA remained low. Yearly prescribing intensity to PPIs increased during the first 15 years of the study period but remained relatively consistent for the remainder of the study period. In contrast, yearly prescribing intensity of H2RAs decreased from 1990 to 2009 but has begun to increase over the past five years.

The overall high prevalence of PPI use in the UK is consistent with a utilization study of PPIs using CPRD data, but whose follow-up period ended at the end of 2014.<sup>11</sup> Importantly, our study further contextualizes the landscape of prescribing acid suppressant drugs by also describing trends of H2RA use. While H2RAs are considerably less popular than PPIs, we observed almost 10 million prescriptions within our study period, suggesting that their use has not been completely supplanted by PPIs. While use of H2RAs may be associated with delirium and acute interstitial nephritis,<sup>22 23</sup> they are generally well tolerated. Indeed, H2RAs are more commonly associated with mild adverse effects like headache and constipation,<sup>22</sup> not the serious adverse effects associated with use of PPIs.<sup>3 12-15</sup> Thus, H2RAs continue to represent an important treatment option for individuals with gastric conditions. Finally, while the prevalence of acid suppressant drugs is consistent with the market availability of both drug classes, it cannot be explained by an increase in the incidence of indications for PPIs and H2RAs, which have been relatively consistent over time.



1  
2  
3 To our knowledge, this is the first study to describe contemporary prescribing practices  
4 following the most recent NICE recommendations in 2014.<sup>16</sup> Given that H2RA prescribing  
5 intensity has begun to increase following publication of the guidelines, this may suggest a gradual  
6 shift in prescribing to favour H2RAs. Indeed, the guidelines recommend treatment with PPIs at  
7 the lowest dose for the shortest amount of time, and thus may favour longer-term H2RA  
8 prescriptions. Future studies should investigate the impact of the NICE recommendations more  
9 thoroughly.

10  
11  
12 Our study demonstrated a sex difference among PPI prescribing patterns and an age  
13 difference among prescribing patterns of both PPIs and H2RAs; women were more frequently  
14 prescribed PPIs and adults at least 60 years old were more frequently prescribed both drug classes.  
15 As women are more likely to report symptoms of gastric reflux than men,<sup>24</sup> this would lead to  
16 more frequent prescribing of acid suppressant drugs to manage these symptoms. Moreover,  
17 dyspepsia, the most common evidence-based indication, was more commonly diagnosed in  
18 women. The age difference may be explained by the increasing incidence of dyspepsia with age,<sup>25</sup>  
19 or through an increased need for gastroprotection in the elderly, whereby patients over the age of  
20 60 who are prescribed NSAIDs or dual antiplatelet therapy are indicated to receive an acid  
21 suppressant drug for gastroprotection.<sup>2</sup>

22  
23 In recent years, there have been concerns about the increasing inappropriate use of PPIs.<sup>6</sup>  
24  
25 <sup>7</sup> Indeed, between 40% and 55% of primary care patients in the United States and the UK do not  
26 have an evidence-based indication for long-term PPI use.<sup>26 27</sup> This is particularly relevant as PPIs  
27 are associated with a number of serious adverse events including enteric infections and  
28 hypomagnesemia.<sup>3 12-15</sup> While there is some evidence that use of PPIs may also be associated with  
29 dementia, pneumonia and gastric cancer,<sup>3 28</sup> not all studies have confirmed these associations.<sup>29 30</sup>

1  
2  
3 Our study adds to the growing literature surrounding inappropriate use, as we illustrated that these  
4 issues extend to H2RA users as well. Indeed, a little over 20% of PPI and H2RA users have no  
5 recorded indication for use, while 37.5% and 46.9%, respectively, remain on their original  
6 treatment course at one year of follow-up, despite recommendations to limit use to 4-8 weeks at a  
7 time for symptomatic treatment of gastro-oesophageal disease and peptic ulcer disease.<sup>16</sup> As  
8 illustrated by the stratified persistence patterns, a significant portion of this high persistence is  
9 among patients with an off-label, or no recorded indication for use. This provides further evidence  
10 on the inappropriate use of acid suppressant drugs.

11  
12 This study has several strengths. To our knowledge, this is the largest and most  
13 comprehensive study to date describing the trends of acid suppressant drugs over time. Our study  
14 describes the use of PPIs and H2RAs over a 29-year period, which is almost the entirety of PPI  
15 market availability. Importantly, we provide new data on the recent use of H2RAs, which indicates  
16 that this drug class is gaining favour among general practitioners. Second, the data we used in this  
17 study has been well validated,<sup>20 21</sup> and shown to be representative of the UK general population.<sup>17</sup>  
18  
19 <sup>18</sup> Finally, the large sample size allowed us to provide detailed information of trends by age group  
20 and sex, and investigate use among rare indications, including Barrett's oesophagus and Zollinger-  
21 Ellison syndrome.

22  
23 This study also has some limitations. Prescriptions recorded in the CPRD are those issued  
24 by general practitioners, and thus it is not possible to assess patient adherence or determine if a  
25 patient filled a prescription. While this may slightly affect the estimate of cumulative incidence of  
26 discontinuation, the rest of our analyses focus on physician prescribing trends. These would not  
27 be influenced by patient adherence and are a better indicator of whether physicians are following  
28 guidelines. Second, it is possible that the trends reported in this study are underestimated, as we

1  
2  
3 do not have information on prescriptions recorded in hospital or by specialists. However, this is  
4  
5 unlikely to lead to substantial underestimation, as general practitioners in the UK are responsible  
6  
7 for long-term patient care.<sup>31</sup> However, it remains possible that the lack of hospitalization data led  
8  
9 to the underestimation of patients requiring short-term treatment with acid suppressant drugs.  
10  
11 Third, this study uses data from the UK only, and as such, it is possible that prescribing trends will  
12  
13 differ in alternate settings. Finally, this study did not include data on over the counter use of  
14  
15 medications. Thus, the relatively high prevalence of patients exposed to acid suppressant drugs  
16  
17 (21.3%) would be even higher if over the counter PPI and H2RA usage was considered. Lack of  
18  
19 over the counter data may have led to the underestimation of patients using acid suppressant drugs  
20  
21 for gastroprotection, as it is possible that some patients receive an NSAID prescription over the  
22  
23 counter.  
24  
25  
26  
27

28  
29 This study demonstrates that while prevalence of PPI use has increased with time, its  
30  
31 prescribing intensity has plateaued over the past 15 years. In contrast, while prevalence of H2RAs  
32  
33 was consistently low throughout the study period, its prescribing intensity has begun to slightly  
34  
35 increase over the past five years. Given that PPIs are associated certain adverse effects not  
36  
37 attributed to H2RAs, H2RAs remain a valuable treatment option for individuals with gastric  
38  
39 conditions.  
40  
41  
42  
43  
44  
45  
46  
47  
48  
49  
50  
51  
52  
53  
54  
55  
56  
57  
58  
59  
60

**REFERENCES**

1. Strand DS, Kim D, Peura DA. 25 Years of Proton Pump Inhibitors: A Comprehensive Review. *Gut and liver* 2017;11(1):27-37. doi: 10.5009/gnl15502 [published Online First: 11/14]
2. Benmassaoud A, McDonald EG, Lee TC. Potential harms of proton pump inhibitor therapy: rare adverse effects of commonly used drugs. 2016;188(9):657-62. doi: 10.1503/cmaj.150570 %J Canadian Medical Association Journal
3. The Development and Safety of Proton Pump Inhibitors. *The Pharmaceutical Journal* 2016;296(7890)
4. Molinder HK. The development of cimetidine: 1964-1976. A human story. *J Clin Gastroenterol* 1994;19(3):248-54. doi: 10.1097/00004836-199410000-00017 [published Online First: 1994/10/01]
5. Audi S, Burrage DR, Lonsdale DO, et al. The 'top 100' drugs and classes in England: an updated 'starter formulary' for trainee prescribers. *British journal of clinical pharmacology* 2018;84(11):2562-71. doi: 10.1111/bcp.13709
6. Walsh K, Kwan D, Marr P, et al. Deprescribing in a family health team: a study of chronic proton pump inhibitor use. *Journal of primary health care* 2016;8(2):164-71. doi: 10.1071/hc15946 [published Online First: 2016/08/02]
7. Katz MH. Failing the acid test: Benefits of proton pump inhibitors may not justify the risks for many users. *Archives of Internal Medicine* 2010;170(9):747-48. doi: 10.1001/archinternmed.2010.64
8. Prescribing PPIs. *Drug and Therapeutics Bulletin* 2017;55(10), 11(55(10), 117)

- 1  
2  
3 9. Farrell B, Pottie K, Thompson W, et al. Deprescribing proton pump inhibitors: Evidence-  
4 based clinical practice guideline. *Can Fam Physician* 2017;63(5):354-64. [published  
5 Online First: 2017/05/14]  
6  
7
- 8  
9  
10 10. Forgacs I, Loganayagam A. Overprescribing proton pump inhibitors. *BMJ (Clinical research*  
11 *ed)* 2008;336(7634):2-3. doi: 10.1136/bmj.39406.449456.BE  
12  
13
- 14  
15 11. Othman F, Card TR, Crooks CJ. Proton pump inhibitor prescribing patterns in the UK: a  
16 primary care database study. *Pharmacoepidemiol Drug Saf* 2016;25(9):1079-87. doi:  
17 10.1002/pds.4043 [published Online First: 2016/06/04]  
18  
19
- 20  
21 12. Nehra AK, Alexander JA, Loftus CG, et al. Proton Pump Inhibitors: Review of Emerging  
22 Concerns. *Mayo Clinic Proceedings* 2018;93(2):240-46. doi:  
23 10.1016/j.mayocp.2017.10.022  
24  
25
- 26  
27 13. Yang Y, George KC, Shang W-F, et al. Proton-pump inhibitors use, and risk of acute kidney  
28 injury: a meta-analysis of observational studies. *Drug design, development and therapy*  
29 2017;11:1291-99. doi: 10.2147/DDDT.S130568  
30  
31
- 32  
33 14. McDonald EG, Milligan J, Frenette C, et al. Continuous Proton Pump Inhibitor Therapy and  
34 the Associated Risk of Recurrent Clostridium difficile InfectionPPI Therapy and  
35 Recurrent C difficile InfectionPPI Therapy and Recurrent C difficile Infection. *JAMA*  
36 *Internal Medicine* 2015;175(5):784-91. doi: 10.1001/jamainternmed.2015.42 %J JAMA  
37  
38  
39  
40  
41  
42  
43  
44  
45  
46  
47  
48  
49  
50  
51  
52  
53  
54  
55  
56  
57  
58  
59  
60
15. Willems RP, van Dijk K, Ket JC, et al. Evaluation of the association between gastric acid  
suppression and risk of intestinal colonization with multidrug-resistant microorganisms: a  
systematic review and meta-analysis. *JAMA internal medicine* 2020;180(4):561-71.

- 1  
2  
3 16. Gastro-oesophageal reflux disease and dyspepsia in adults: investigation and management  
4  
5 National Institute for Health and Care Excellence 2014 [  
6  
7  
8 17. Herrett E, Gallagher AM, Bhaskaran K, et al. Data Resource Profile: Clinical Practice  
9  
10 Research Datalink (CPRD). *Int J Epidemiol* 2015;44(3):827-36. doi: 10.1093/ije/dyv098  
11  
12 [published Online First: 2015/06/08]  
13  
14  
15 18. Wolf A, Dedman D, Campbell J, et al. Data resource profile: Clinical Practice Research  
16  
17 Datalink (CPRD) Aurum. *International Journal of Epidemiology* 2019 doi:  
18  
19 10.1093/ije/dyz034  
20  
21  
22 19. Read codes. United Kingdom National Health Service 2010 [Available from:  
23  
24 <https://www.nlm.nih.gov/research/umls/sourcereleasedocs/current/RCD/> accessed 2017.  
25  
26  
27 20. Jick SS, Kaye JA, Vasilakis-Scaramozza C, et al. Validity of the general practice research  
28  
29 database. *Pharmacotherapy* 2003;23(5):686-9. [published Online First: 2003/05/14]  
30  
31  
32 21. Lawrenson R, Williams T, Farmer R. Clinical information for research; the use of general  
33  
34 practice databases. *J Public Health Med* 1999;21(3):299-304. [published Online First:  
35  
36 1999/10/21]  
37  
38  
39 22. Nugent CC, Terrell JM. H2 Blockers. StatPearls [Internet]: StatPearls Publishing 2019.  
40  
41  
42 23. Fisher AA, Le Couteur DG. Nephrotoxicity and hepatotoxicity of histamine H2 receptor  
43  
44 antagonists. *Drug Saf* 2001;24(1):39-57. doi: 10.2165/00002018-200124010-00004  
45  
46 [published Online First: 2001/02/24]  
47  
48  
49 24. Kim YS, Kim N, Kim GH. Sex and gender differences in gastroesophageal reflux disease.  
50  
51 *Journal of neurogastroenterology and motility* 2016;22(4):575.  
52  
53  
54 25. Piessevaux H, De Winter B, Louis E, et al. Dyspeptic symptoms in the general population: a  
55  
56 factor and cluster analysis of symptom groupings. *Neurogastroenterol Motil*

- 2009;21(4):378-88. doi: 10.1111/j.1365-2982.2009.01262.x [published Online First: 02/12]
26. Heidelbaugh JJ, Goldberg KL, Inadomi JM. Magnitude and economic effect of overuse of antisecretory therapy in the ambulatory care setting. *The American journal of managed care* 2010;16(9):e228-34.
27. Batuwitage BT, Kingham JG, Morgan NE, et al. Inappropriate prescribing of proton pump inhibitors in primary care. *Postgraduate Medical Journal* 2007;83(975):66-68.
28. Wan Q-Y, Wu X-T, Li N, et al. Long-term proton pump inhibitors use and risk of gastric cancer: a meta-analysis of 926 386 participants. *Gut* 2018:gutjnl-2018-316416. doi: 10.1136/gutjnl-2018-316416
29. Park SK, Nam JH, Lee H, et al. Beyond uncertainty: Negative findings for the association between the use of proton pump inhibitors and risk of dementia. *J Gastroenterol Hepatol* 2019;34(12):2135-43.
30. Moayyedi P, Eikelboom JW, Bosch J, et al. Safety of Proton Pump Inhibitors Based on a Large, Multi-Year, Randomized Trial of Patients Receiving Rivaroxaban or Aspirin. *Gastroenterology* 2019;157(3):682-91.e2. doi: 10.1053/j.gastro.2019.05.056 [published Online First: 2019/06/04]
31. Ahrens D, Behrens G, Himmel W, et al. Appropriateness of proton pump inhibitor recommendations at hospital discharge and continuation in primary care. *International journal of clinical practice* 2012;66(8):767-73. doi: 10.1111/j.1742-1241.2012.02973.x [published Online First: 2012/07/19]

**Table 1. Characteristics of Individuals Newly Prescribed Proton Pump Inhibitors and Histamine-2 Receptor Antagonists**

| Characteristic                             | Proton Pump Inhibitors † | Histamine-2 Receptor Antagonists ‡ |
|--------------------------------------------|--------------------------|------------------------------------|
| Total                                      | 1,699,837                | 385,988                            |
| Male, n (%)                                | 768,781 (45.2)           | 167,683 (43.4)                     |
| Age, years (mean, SD)                      | 53.4 (18.9)              | 48.6 (21.1)                        |
| Age group, n (%)                           |                          |                                    |
| < 18 years                                 | 34,590 (2.0)             | 30,057 (7.8)                       |
| 18-39 years                                | 393,052 (23.1)           | 109,205 (28.3)                     |
| 40-59 years                                | 596,469 (35.1)           | 116,174 (30.1)                     |
| ≥60 years                                  | 675,726 (39.8)           | 130,552 (33.8)                     |
| Evidence-based indication, n (%)§          | 740,177 (43.5)           | 174,836 (45.3)                     |
| Dyspepsia                                  | 316,831                  | 112,737                            |
| Gastroprotection                           | 288,360                  | 41,350                             |
| Gastro-oesophageal reflux disease          | 158,405                  | 33,480                             |
| Peptic ulcer disease                       | 50,239                   | 14,453                             |
| Helicobacter pylori infection              | 41,430                   | 2,526                              |
| Barrett's oesophagus                       | 4,180                    | 137                                |
| Zollinger-Ellison syndrome                 | 24                       | 5                                  |
| Non-evidence based gastroprotection, n (%) | 363,992 (21.4)           | 51,476 (13.3)                      |
| Off-label indication, n (%)§               | 253,591 (14.9)           | 72,431 (18.8)                      |
| Stomach pain                               | 231,715                  | 64,188                             |
| Gastritis or duodenitis                    | 35,908                   | 13,096                             |
| No recorded indication, n (%)              | 342,077 (20.1)           | 87,245 (22.6)                      |
| Reason for discontinuation ¶               |                          |                                    |
| Switch to other class                      | 43,988 (2.6)             | 124,648 (32.3)                     |
| Treatment gap > 30 days                    | 893,230 (52.5)           | 122,928 (31.8)                     |
| Administrative Censoring                   | 762,619 (44.9)           | 138,412 (35.9)                     |

§ Indication categories are not mutually exclusive.

¶ Median (interquartile range) duration of first treatment course for PPI users and H2RA users was 144 (59 to 870) days and 279 (61 to 1,645) days, respectively.



**FIGURE LEGENDS**

- 1  
2  
3  
4  
5 Figure 1 Overall Prevalence of Proton Pump Inhibitor and Histamine-2 Receptor  
6 Antagonist Use  
7  
8 Figure 2 Sex-stratified Prevalence of Proton Pump Inhibitor and Histamine-2 Receptor  
9 Antagonist Use  
10  
11 Figure 3 Age-stratified Prevalence of A) Proton Pump Inhibitor Use and b) Histamine-2  
12 Receptor Antagonist Use  
13  
14  
15 Figure 4 Persistence to Original Treatment Course for Proton Pump Inhibitor and  
16 Histamine-2 Receptor Antagonist Initiators  
17  
18  
19  
20  
21  
22  
23  
24  
25  
26  
27  
28  
29  
30  
31  
32  
33  
34  
35  
36  
37  
38  
39  
40  
41  
42  
43  
44  
45  
46  
47  
48  
49  
50  
51  
52  
53  
54  
55  
56  
57  
58  
59  
60

1  
2  
3  
4  
5  
6  
7  
8  
9  
10  
11  
12  
13  
14  
15  
16  
17  
18  
19  
20  
21  
22  
23  
24  
25  
26  
27  
28  
29  
30  
31  
32  
33  
34  
35  
36  
37  
38  
39  
40  
41  
42  
43  
44  
45  
46  
47  
48  
49  
50  
51  
52  
53  
54  
55  
56  
57  
58  
59  
60

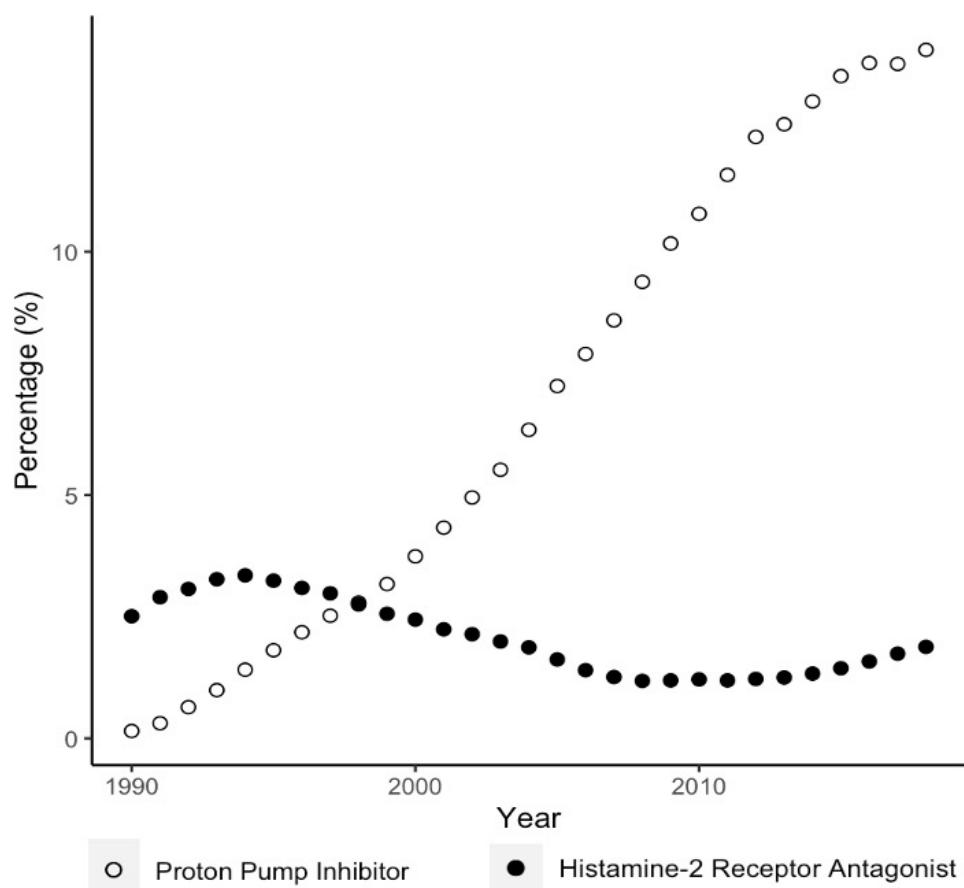

Figure 1  
Overall Prevalence of Proton Pump Inhibitor and Histamine-2 Receptor Antagonist Use  
128x116mm (144 x 144 DPI)

1  
2  
3  
4  
5  
6  
7  
8  
9  
10  
11  
12  
13  
14  
15  
16  
17  
18  
19  
20  
21  
22  
23  
24  
25  
26  
27  
28  
29  
30  
31  
32  
33  
34  
35  
36  
37  
38  
39  
40  
41  
42  
43  
44  
45  
46  
47  
48  
49  
50  
51  
52  
53  
54  
55  
56  
57  
58  
59  
60

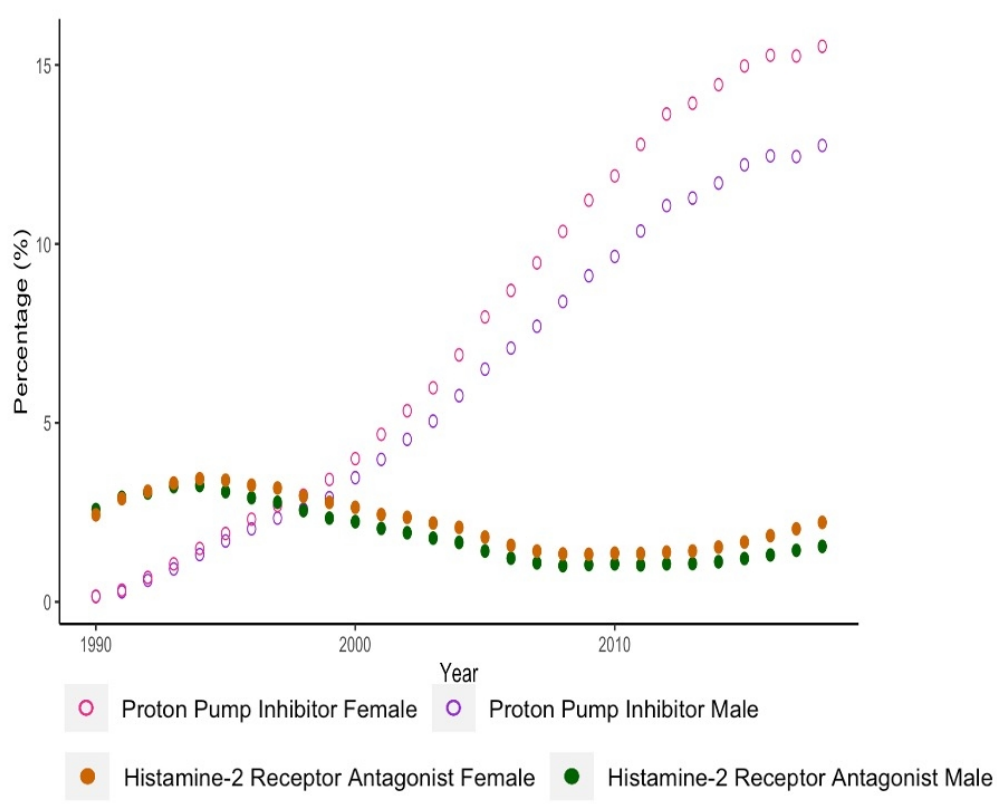

Figure 2  
Sex-stratified Prevalence of Proton Pump Inhibitor and Histamine-2 Receptor Antagonist Use  
158x129mm (144 x 144 DPI)

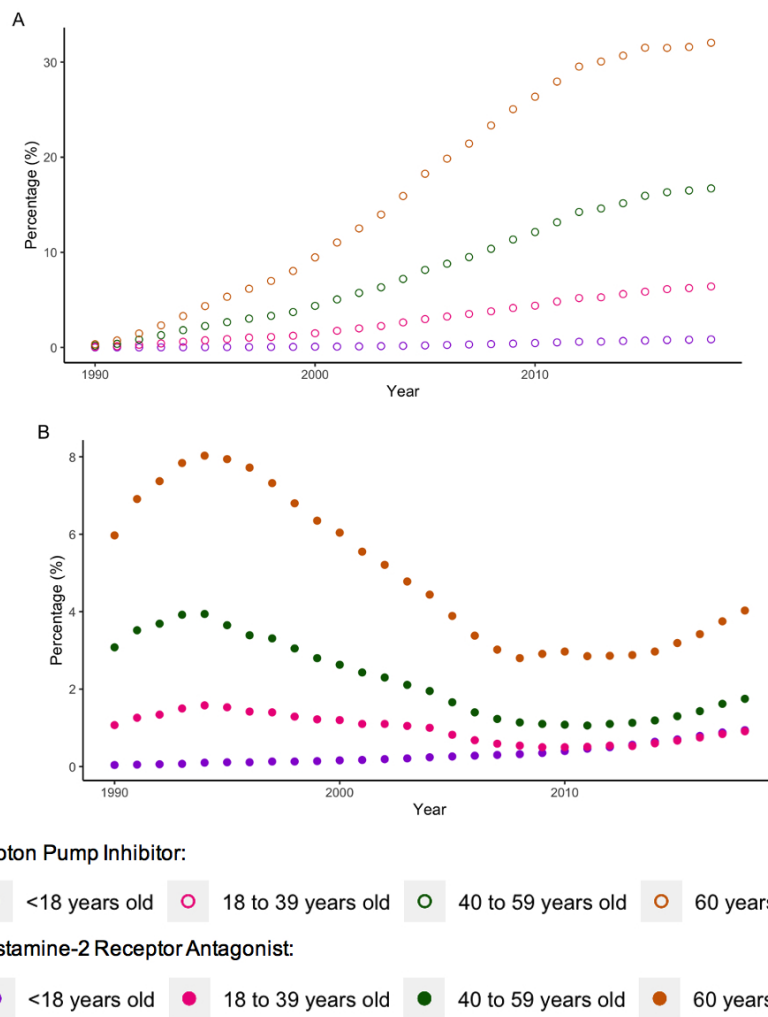

Figure 3  
Age-stratified Prevalence of A) Proton Pump Inhibitor Use and b) Histamine-2 Receptor Antagonist Use

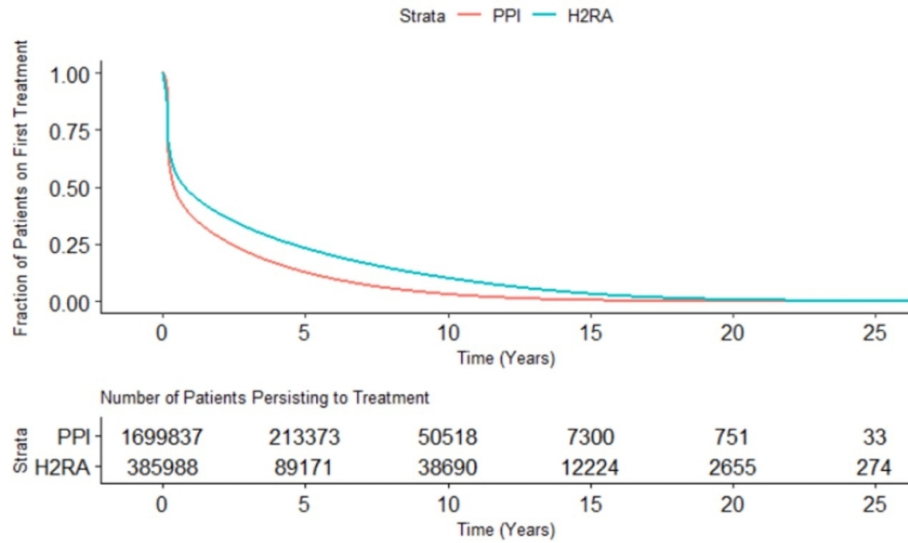

Figure 4  
Persistence to Original Treatment Course for Proton Pump Inhibitor and Histamine-2 Receptor Antagonist Initiators

245x136mm (144 x 144 DPI)

## Table of Contents

|                                                                                                                                                                                          |    |
|------------------------------------------------------------------------------------------------------------------------------------------------------------------------------------------|----|
| Supplementary Table 1. List of British National Formulary Codes for Proton Pump Inhibitors.....                                                                                          | 2  |
| Supplementary Table 2. List of British National Formulary Codes for Histamine-2 Receptor Antagonists .....                                                                               | 3  |
| Supplementary Table 3. Sex Stratified Indications for Individuals Newly Prescribed Proton Pump Inhibitors and Histamine-2 Receptor Antagonists.....                                      | 4  |
| Supplementary Table 4. Changes in Prescribing Intensity Over 5-Year Intervals for Proton Pump Inhibitors and Histamine-2 Receptor Antagonists.....                                       | 5  |
| Supplementary Table 5. Reason for Discontinuation of Initial Acid Suppressant Treatment Course Under Alternate Grace Periods.....                                                        | 6  |
| Supplementary Figure 1. Incidence of Indications for Proton Pump Inhibitors and Histamine-2 Receptor Antagonists Over Time .....                                                         | 7  |
| Supplementary Figure 2. Overall Prevalence of Proton Pump Inhibitor and Histamine-2 Receptor Antagonist Use in New Users.....                                                            | 8  |
| Supplementary Figure 3. Sex-stratified Prevalence of Proton Pump Inhibitor and Histamine-2 Receptor Antagonist Use in New Users .....                                                    | 9  |
| Supplementary Figure 4. Age-stratified Prevalence of A) Proton Pump Inhibitor Use and b) Histamine-2 Receptor Antagonist Use in New Users.....                                           | 10 |
| Supplementary Figure 5. Prevalence of A) Proton Pump Inhibitor Prescriptions and B) Histamine-2 Receptor Antagonist Prescriptions Stratified by Individual Drug Type.....                | 11 |
| Supplementary Figure 6. Prescribing Intensity of Proton Pump Inhibitors and Histamine-2 Receptor Antagonists .....                                                                       | 12 |
| Supplementary Figure 7. Persistence to Original Treatment Course for Proton Pump Inhibitor and Histamine-2 Receptor Antagonist Initiators with Evidence-based Indications for Use .....  | 13 |
| Supplementary Figure 8. Persistence to Original Treatment Course for Proton Pump Inhibitor and Histamine-2 Receptor Antagonist Initiators with Non-evidence Based Gastroprotection ..... | 14 |
| Supplementary Figure 9. Persistence to Original Treatment Course for Proton Pump Inhibitor and Histamine-2 Receptor Antagonist Initiators with Off-label Indications for Use.....        | 15 |
| Supplementary Figure 10. Persistence to Original Treatment Course for Proton Pump Inhibitor and Histamine-2 Receptor Antagonist Initiators with No Recorded Indication for Use.....      | 16 |

---

**Supplementary Table 1. List of British National Formulary Codes for Proton Pump Inhibitors**

---

| <b>British National Formulary Code</b> | <b>British National Formulary Header</b>                     |
|----------------------------------------|--------------------------------------------------------------|
| 01030500/05010103                      | Proton Pump Inhibitors/Broad-spectrum Penicillins            |
| 01030500/10010100                      | Proton Pump Inhibitors/Non-steroidal Anti-inflammatory Drugs |
| 01030500/05010500                      | Proton Pump Inhibitors/Macrolides                            |
| 1030500                                | Proton Pump Inhibitors                                       |

---

For peer review only

---

**Supplementary Table 2. List of British National Formulary Codes for Histamine-2 Receptor Antagonists**


---

| <b>British National Formulary Code</b> | <b>British National Formulary Header</b>               |
|----------------------------------------|--------------------------------------------------------|
| 1030100                                | H2 receptor antagonists                                |
| 01030100/01010201                      | H2 receptor antagonists/Alginate preparations          |
| 01030300/01030100                      | Chelates and complexes/H2 receptor antagonists         |
| 01030300/01030100                      | Chelates and complexes/H2 receptor antagonists         |
| 01030100/01010202                      | H2 receptor antagonists/Indigestion remedies           |
| 01010201/01030100                      | Compound Alginate Preparations/H2-Receptor Antagonists |
| 01010202/01030100                      | Indigestion Preparations/H2-Receptor Antagonists       |

---

Abbreviations: H2, Histamine-2.



**Supplementary Table 3. Sex Stratified Indications for Individuals Newly Prescribed Proton Pump Inhibitors and Histamine-2 Receptor Antagonists**

| Indication                                             | Male           | Female         |
|--------------------------------------------------------|----------------|----------------|
| Proton Pump Inhibitor, n (%)<br>(n = 1,699,837)        | 768,781 (45.2) | 931,056 (54.8) |
| Evidence-based indication, n (%) <sup>§</sup>          | 342,934 (44.6) | 397,243 (42.7) |
| Dyspepsia                                              | 141,072        | 175,759        |
| Gastroprotection                                       | 132,637        | 155,723        |
| Gastro-oesophageal reflux disease                      | 73,683         | 84,722         |
| Peptic ulcer disease                                   | 31,416         | 18,823         |
| Helicobacter pylori infection                          | 19,001         | 22,429         |
| Barrett's oesophagus                                   | 2,724          | 1,456          |
| Zollinger-Ellison syndrome                             | 17             | 7              |
| Non-evidence based gastroprotection, n (%)             | 165,252 (21.5) | 198,740 (21.3) |
| Off-label indication, n (%) <sup>§</sup>               | 97,248 (12.6)  | 156,343 (16.8) |
| Stomach pain                                           | 85,628         | 146,087        |
| Gastritis or duodenitis                                | 17,091         | 18,817         |
| No recorded indication, n (%)                          | 163,347 (21.2) | 178,730 (19.2) |
| Histamine-2 Receptor Antagonists, n (%)<br>(n=385,988) | 167,683 (43.4) | 218,305 (56.6) |
| Evidence-based indication, n (%) <sup>§</sup>          | 77,482 (46.2)  | 97,354 (44.6)  |
| Dyspepsia                                              | 49,650         | 63,087         |
| Gastroprotection                                       | 16,809         | 24,541         |
| Gastro-oesophageal reflux disease                      | 14,151         | 19,329         |
| Peptic ulcer disease                                   | 8,834          | 5,619          |
| Helicobacter pylori infection                          | 1,127          | 1,399          |
| Barrett's oesophagus                                   | 80             | 57             |
| Zollinger-Ellison syndrome                             | S*             | S*             |
| Non-evidence based gastroprotection, n (%)             | 22,644 (13.5)  | 28,832 (13.2)  |
| Off-label indication, n (%) <sup>§</sup>               | 29,227 (17.4)  | 43,204 (19.8)  |
| Stomach pain                                           | 24,765         | 39,423         |
| Gastritis or duodenitis                                | 6,315          | 6,781          |
| No recorded indication, n (%)                          | 38,330 (22.9)  | 48,915 (22.4)  |

<sup>§</sup> Indication categories are not mutually exclusive.

S\* Numbers <5 are not displayed, as per the confidentiality practices of the Clinical Practice Research Datalink.

**Supplementary Table 4. Changes in Prescribing Intensity Over 5-Year Intervals for Proton Pump Inhibitors and Histamine-2 Receptor Antagonists**

| <b>Interval</b> | <b>Proton Pump Inhibitor IRR (95% CI)</b> | <b>Histamine-2 Receptor Antagonists IRR (95% CI)</b> |
|-----------------|-------------------------------------------|------------------------------------------------------|
| 1990-1994       | 1.47 (1.39 – 1.54)                        | 0.79 (0.76 – 0.81)                                   |
| 1995-1999       | 1.14 (1.13 – 1.16)                        | 0.90 (0.90 – 0.91)                                   |
| 2000-2004       | 1.07 (1.06 – 1.08)                        | 0.87 (0.87 – 0.87)                                   |
| 2005-2009       | 1.01 (1.01 – 1.01)                        | 0.86 (0.84 – 0.87)                                   |
| 2010-2014       | 0.99 (0.99 – 1.00)                        | 0.97 (0.95 – 0.99)                                   |
| 2015-2018       | 0.97 (0.97 – 0.97)                        | 1.05 (1.05 – 1.05)                                   |

Abbreviations: IRR: Incidence rate ratio; CI: confidence interval.

**Supplementary Table 5. Reason for Discontinuation of Initial Acid Suppressant Treatment Course Under Alternate Grace Periods**

| <b>Reason for Discontinuation</b> | <b>Proton Pump Inhibitors<br/>(n=1,699,837)</b> | <b>Histamine-2 Receptor Antagonists<br/>(n=385,988)</b> |
|-----------------------------------|-------------------------------------------------|---------------------------------------------------------|
| <b>7 Day Grace Period †</b>       |                                                 |                                                         |
| Switch to other class             | 31,818 (1.9)                                    | 111,100 (28.8)                                          |
| Treatment gap > 7 days            | 1,020,369 (60.0)                                | 147,753 (38.3)                                          |
| Administrative Censoring          | 647,650 (38.1)                                  | 127,135 (32.9)                                          |
| <b>60 Day Grace Period ‡</b>      |                                                 |                                                         |
| Switch to other class             | 54,783 (3.2)                                    | 135,039 (35.0)                                          |
| Treatment gap > 60 days           | 778,676 (45.8)                                  | 103,837 (26.9)                                          |
| Administrative Censoring          | 866,378 (51.0)                                  | 147,112 (38.1)                                          |

† median (interquartile range) duration of first treatment course for PPI users and H2RA users was 66 (36 to 560) and 149 (38 to 1,479) days, respectively.

‡ median (interquartile range) duration of first treatment course for PPI users and H2RA users was 231 (89 to 1,097) and 381 (91 to 1,785) days, respectively.

Supplementary Figure 1. Incidence of Indications for Proton Pump Inhibitors and Histamine-2 Receptor Antagonists Over Time

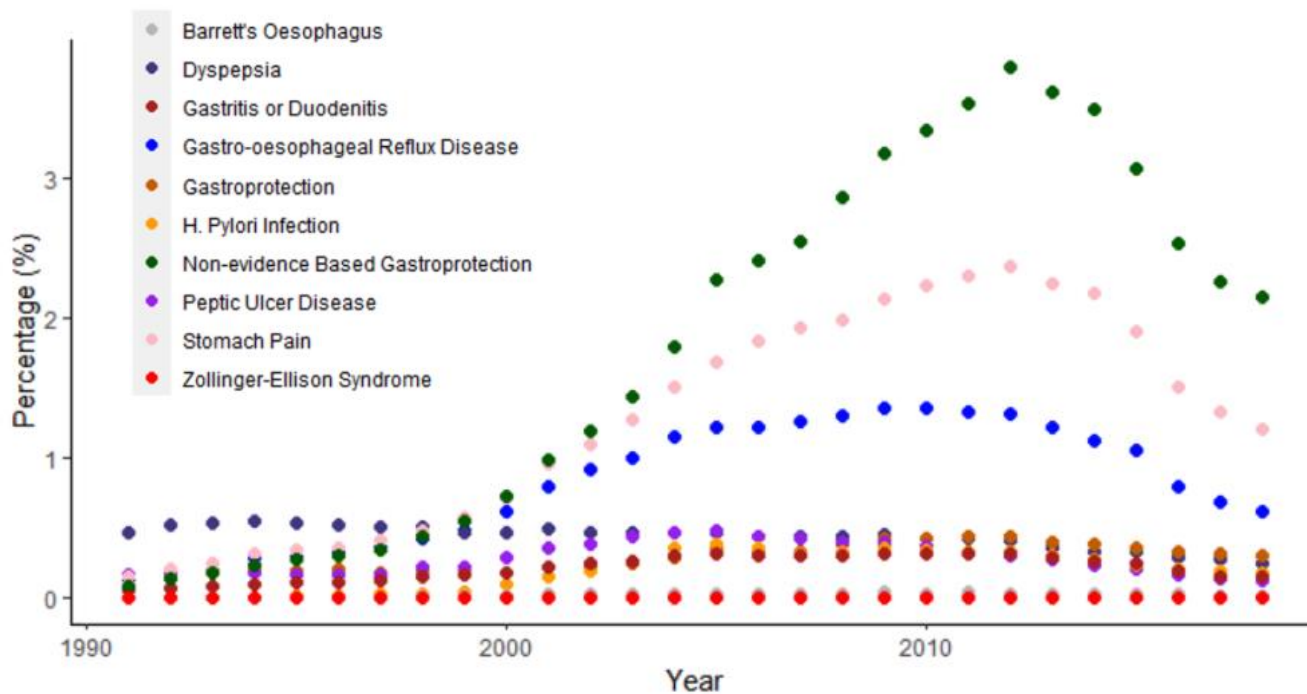

view only

**Supplementary Figure 2. Overall Prevalence of Proton Pump Inhibitor and Histamine-2 Receptor Antagonist Use in New Users**

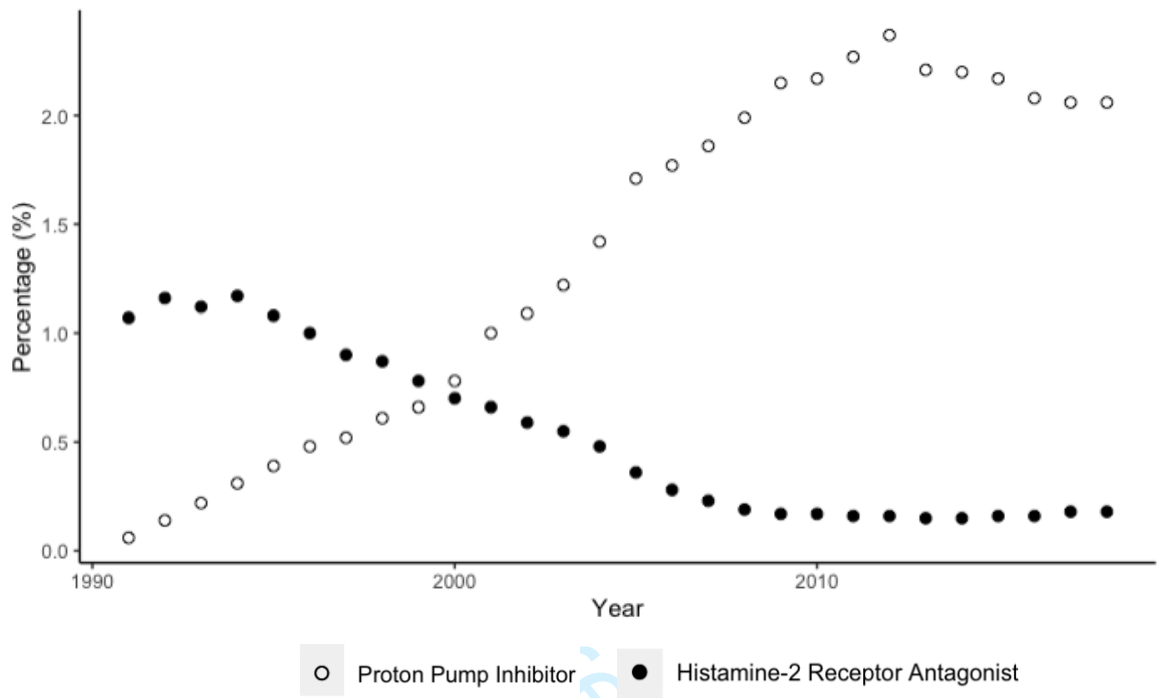

Review only

**Supplementary Figure 3. Sex-stratified Prevalence of Proton Pump Inhibitor and Histamine-2 Receptor Antagonist Use in New Users**

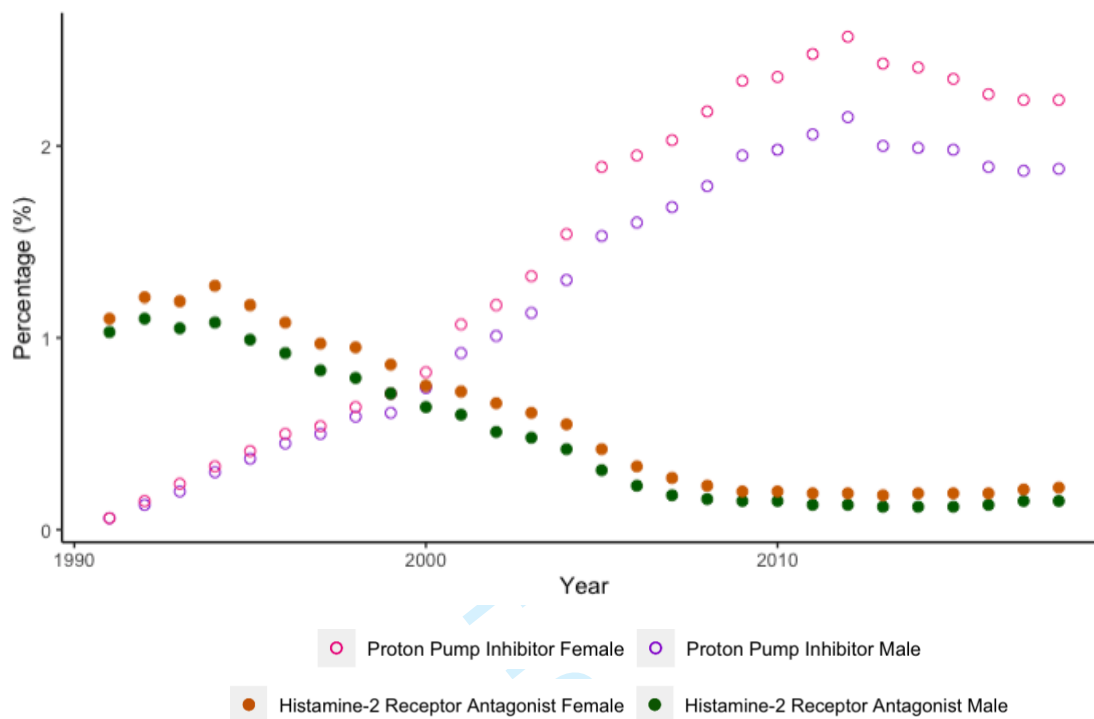

**Supplementary Figure 4. Age-stratified Prevalence of A) Proton Pump Inhibitor Use and  
b) Histamine-2 Receptor Antagonist Use in New Users**

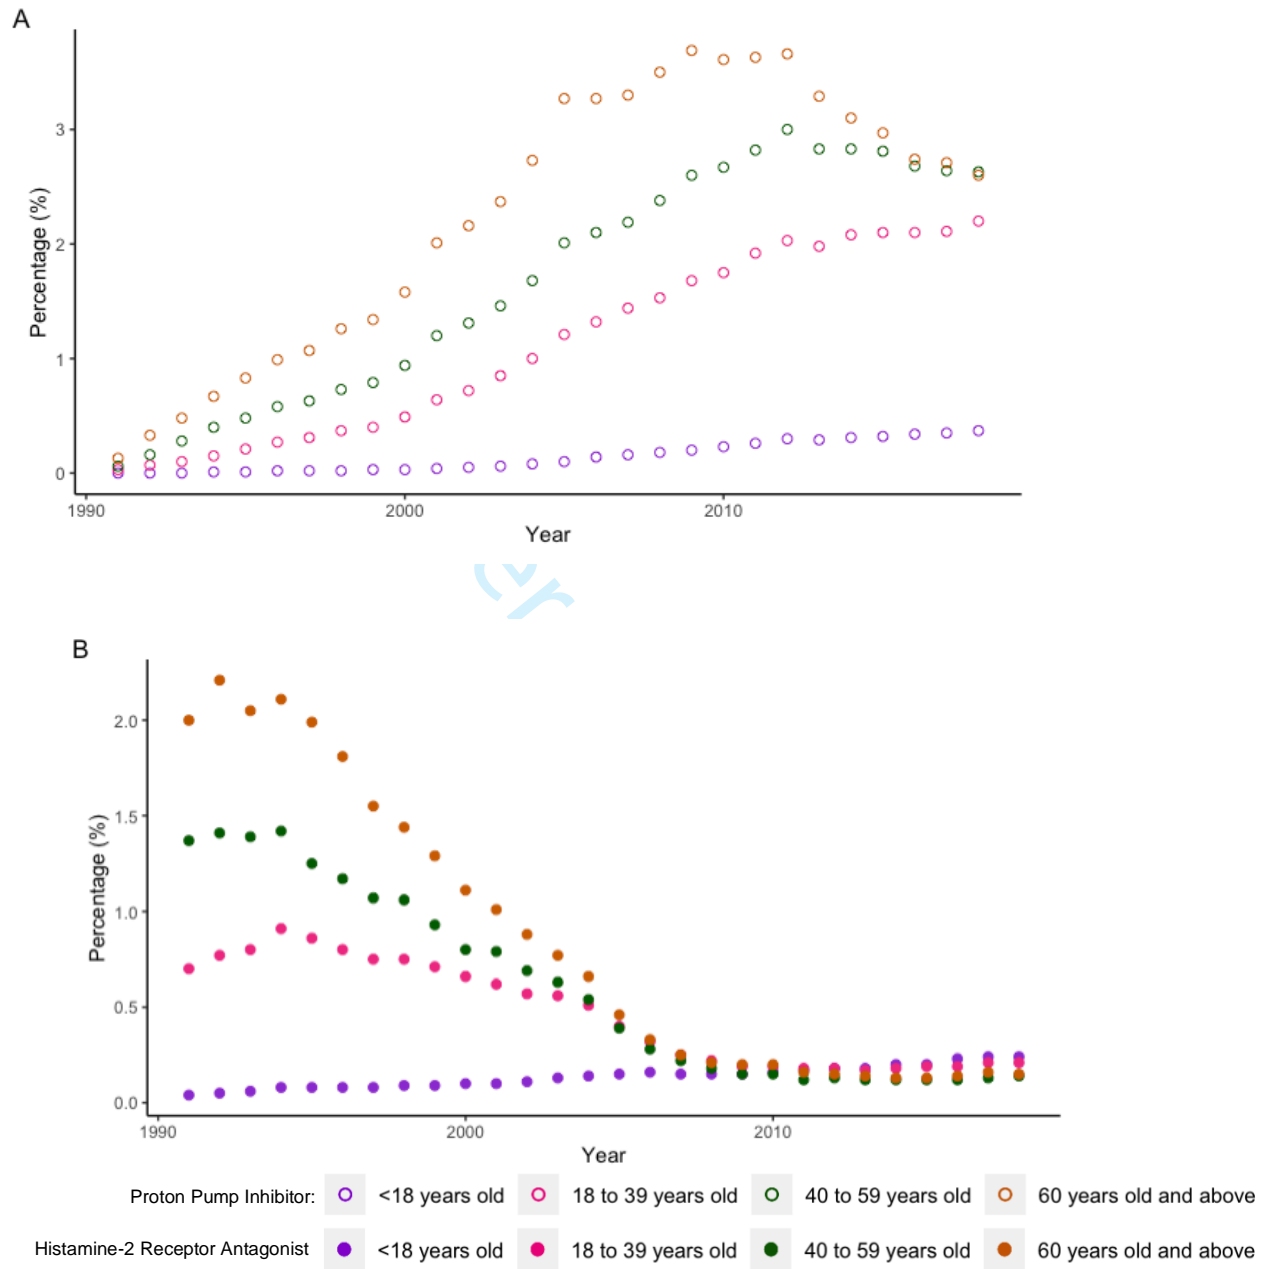

**Supplementary Figure 5. Prevalence of A) Proton Pump Inhibitor Prescriptions and B) Histamine-2 Receptor Antagonist Prescriptions Stratified by Individual Drug Type**

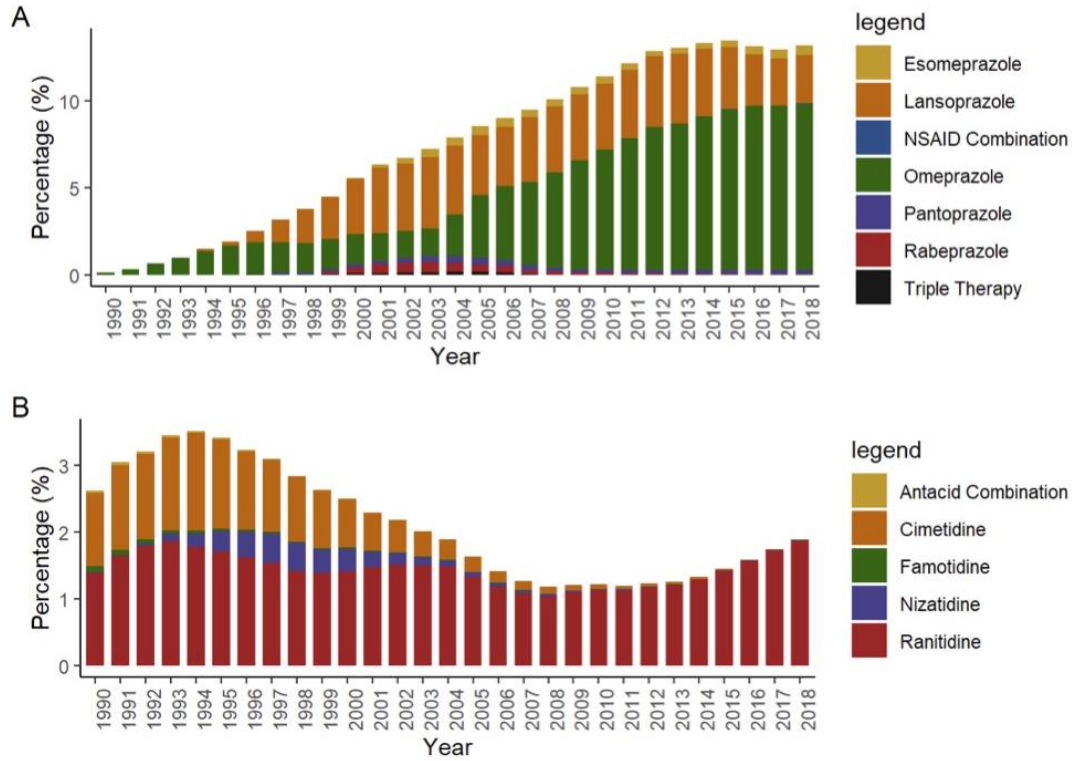



Supplementary Figure 6. Prescribing Intensity of Proton Pump Inhibitors and Histamine-2 Receptor Antagonists

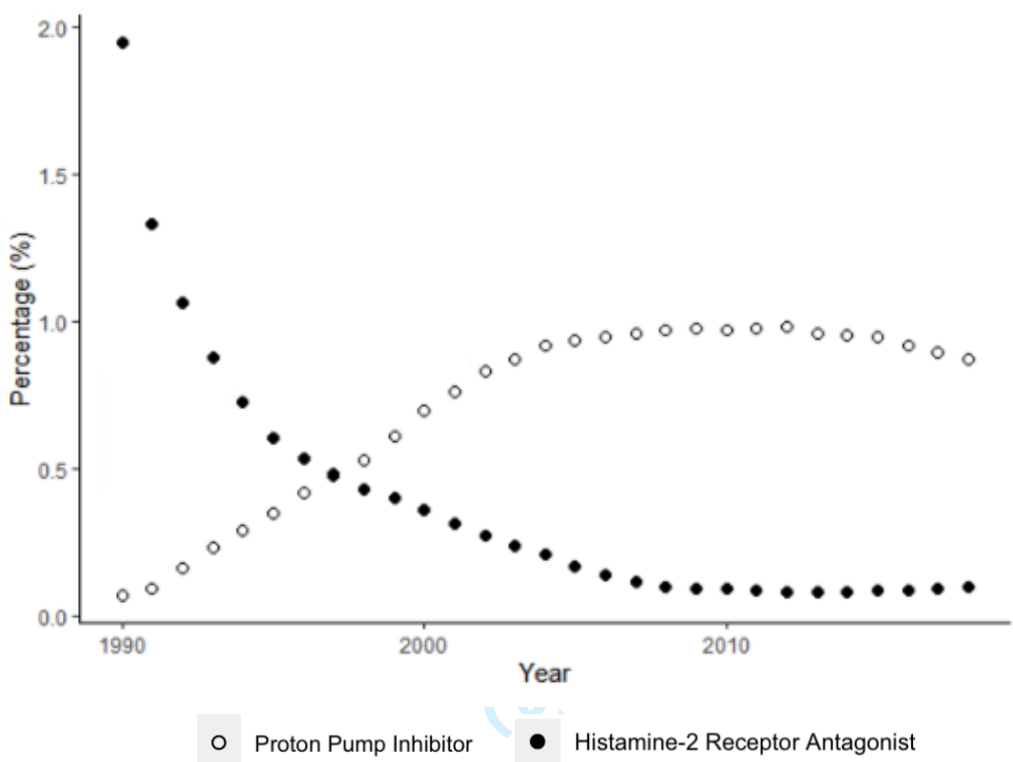

**Supplementary Figure 7. Persistence to Original Treatment Course for Proton Pump Inhibitor and Histamine-2 Receptor Antagonist Initiators with Evidence-based Indications for Use**

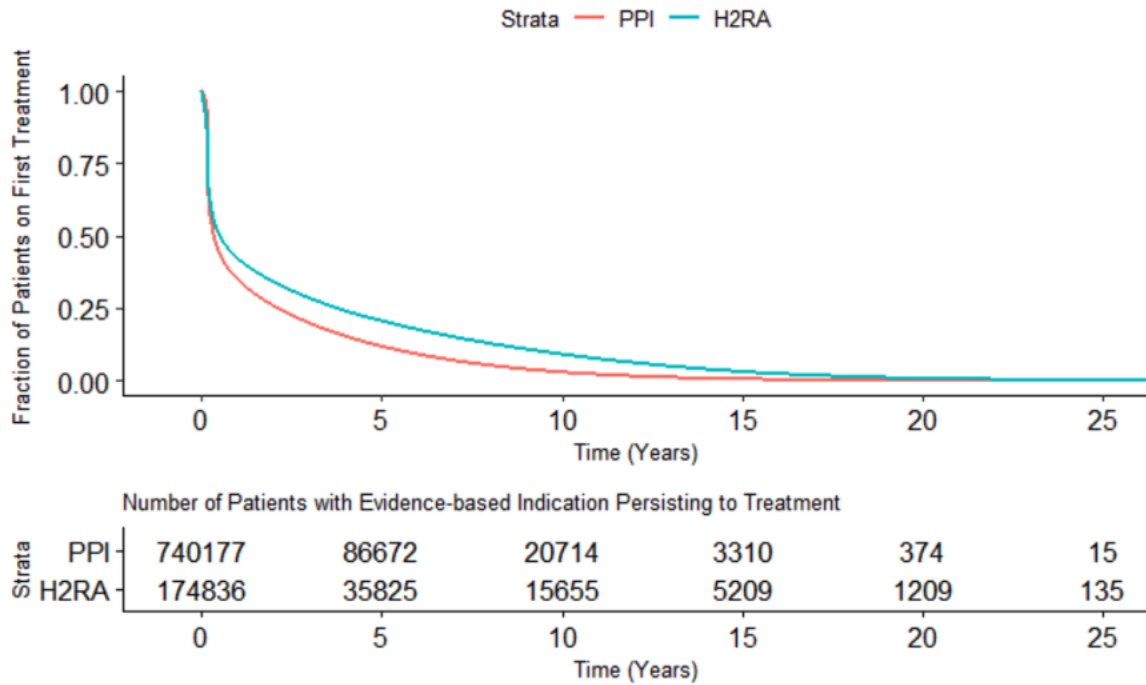

**Supplementary Figure 8. Persistence to Original Treatment Course for Proton Pump Inhibitor and Histamine-2 Receptor Antagonist Initiators with Non-evidence Based Gastroprotection**

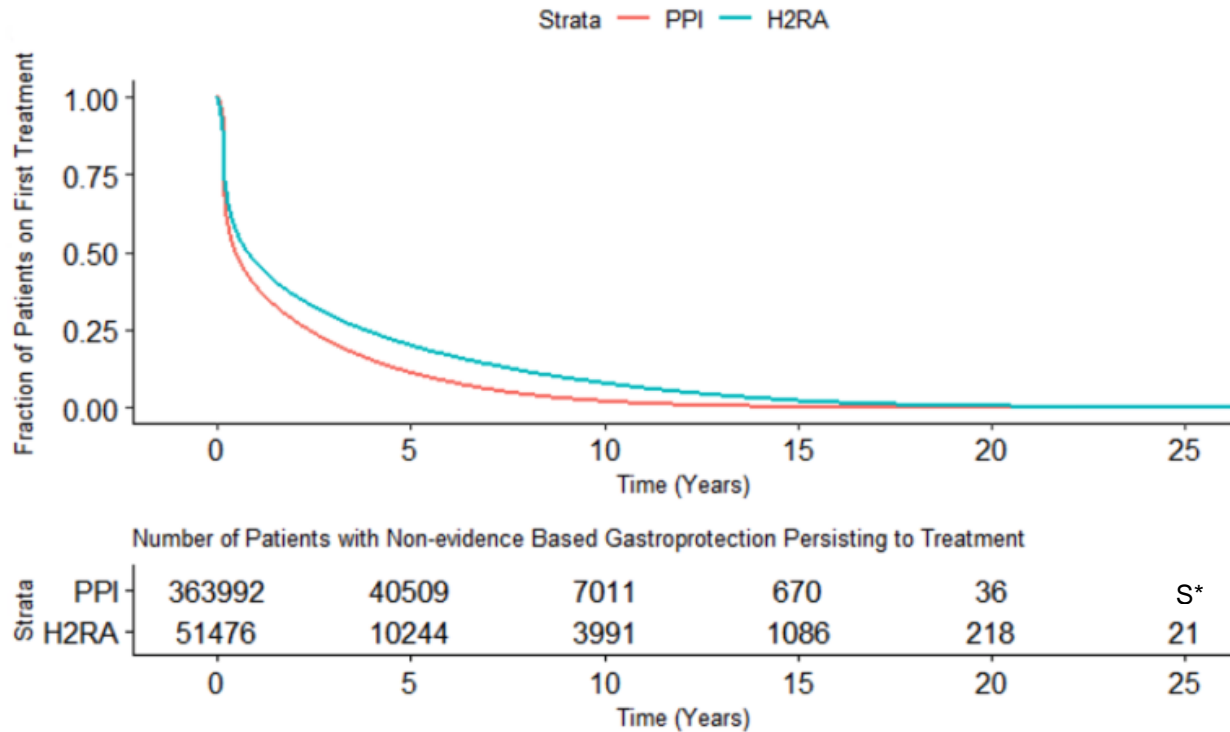

S\* Numbers <5 are not displayed, as per the confidentiality practices of the Clinical Practice Research Datalink.

**Supplementary Figure 9. Persistence to Original Treatment Course for Proton Pump Inhibitor and Histamine-2 Receptor Antagonist Initiators with Off-label Indications for Use**

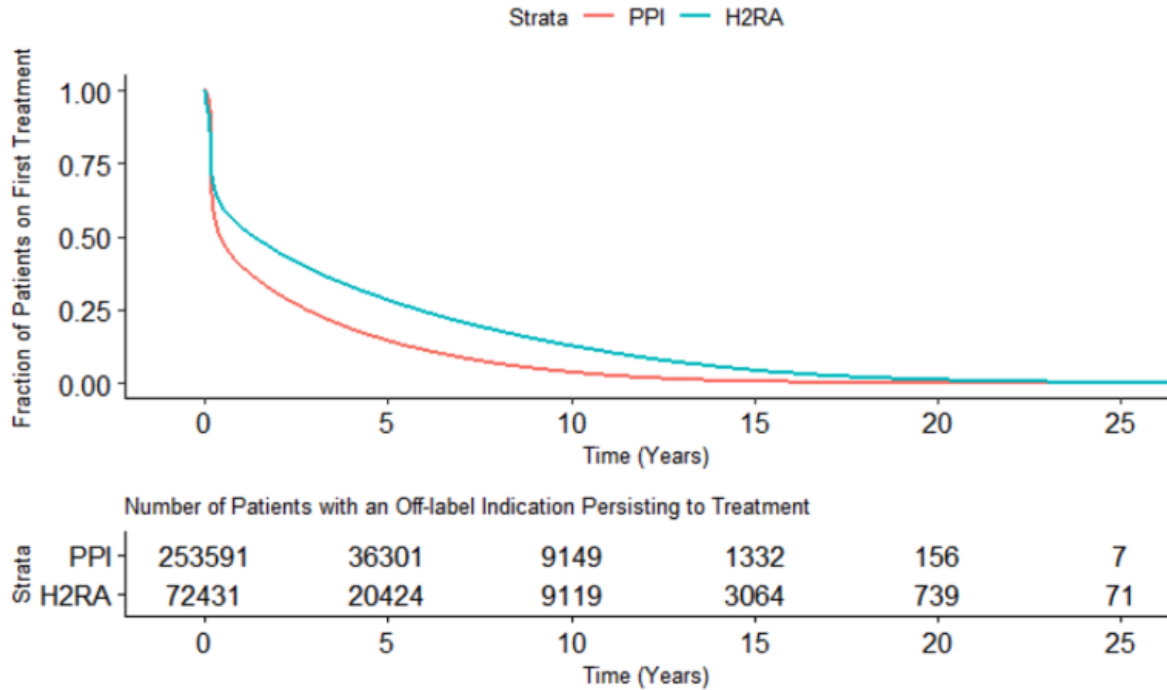

view only

**Supplementary Figure 10. Persistence to Original Treatment Course for Proton Pump Inhibitor and Histamine-2 Receptor Antagonist Initiators with No Recorded Indication for Use**

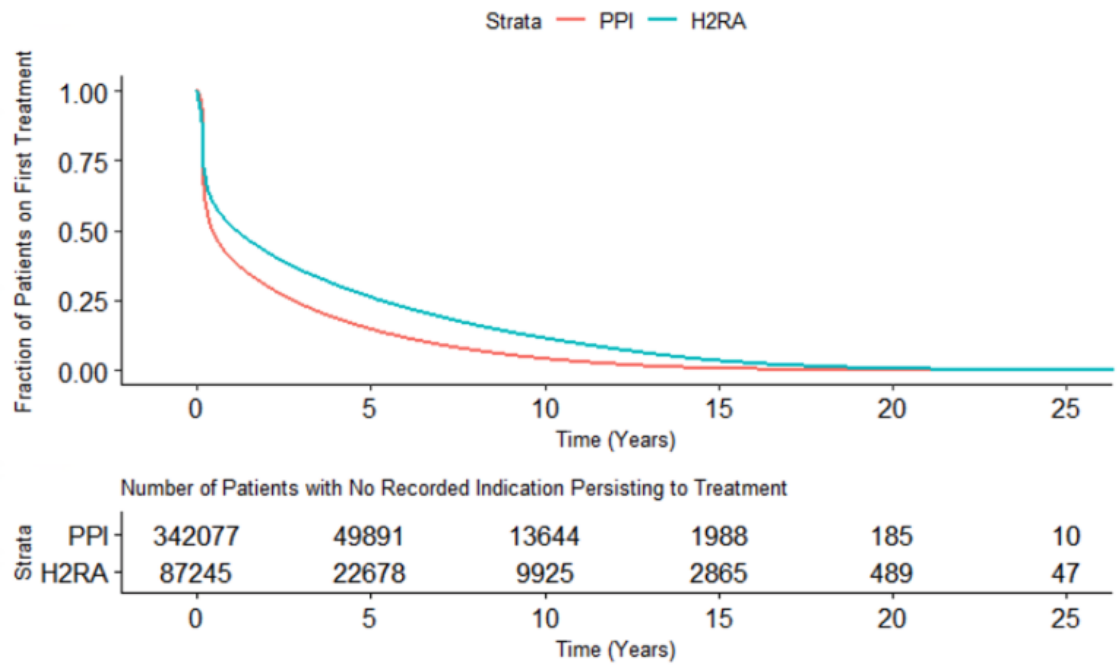

Review only

**STROBE 2007 (v4) Statement—Checklist of items that should be included in reports of *cross-sectional studies***

| Section/Topic                | Item # | Recommendation                                                                                                                                                                       | Reported on page # |
|------------------------------|--------|--------------------------------------------------------------------------------------------------------------------------------------------------------------------------------------|--------------------|
| <b>Title and abstract</b>    | 1      | (a) Indicate the study's design with a commonly used term in the title or the abstract                                                                                               | 1                  |
|                              |        | (b) Provide in the abstract an informative and balanced summary of what was done and what was found                                                                                  | 2,3                |
| <b>Introduction</b>          |        |                                                                                                                                                                                      |                    |
| Background/rationale         | 2      | Explain the scientific background and rationale for the investigation being reported                                                                                                 | 5                  |
| Objectives                   | 3      | State specific objectives, including any prespecified hypotheses                                                                                                                     | 6                  |
| <b>Methods</b>               |        |                                                                                                                                                                                      |                    |
| Study design                 | 4      | Present key elements of study design early in the paper                                                                                                                              | 7                  |
| Setting                      | 5      | Describe the setting, locations, and relevant dates, including periods of recruitment, exposure, follow-up, and data collection                                                      | 7                  |
| Participants                 | 6      | (a) Give the eligibility criteria, and the sources and methods of selection of participants                                                                                          | 7,8                |
| Variables                    | 7      | Clearly define all outcomes, exposures, predictors, potential confounders, and effect modifiers. Give diagnostic criteria, if applicable                                             | 8, 9, 10, 11       |
| Data sources/<br>measurement | 8*     | For each variable of interest, give sources of data and details of methods of assessment (measurement). Describe comparability of assessment methods if there is more than one group | 8, 9, 10, 11       |
| Bias                         | 9      | Describe any efforts to address potential sources of bias                                                                                                                            | 11                 |
| Study size                   | 10     | Explain how the study size was arrived at                                                                                                                                            | 7, 8               |
| Quantitative variables       | 11     | Explain how quantitative variables were handled in the analyses. If applicable, describe which groupings were chosen and why                                                         | 8, 9, 10, 11       |
| Statistical methods          | 12     | (a) Describe all statistical methods, including those used to control for confounding                                                                                                | 8, 9, 10, 11       |
|                              |        | (b) Describe any methods used to examine subgroups and interactions                                                                                                                  | 8, 9, 10, 11       |
|                              |        | (c) Explain how missing data were addressed                                                                                                                                          | 8                  |
|                              |        | (d) If applicable, describe analytical methods taking account of sampling strategy                                                                                                   | NA                 |
|                              |        | (e) Describe any sensitivity analyses                                                                                                                                                | 11                 |
| <b>Results</b>               |        |                                                                                                                                                                                      |                    |

|                          |     |                                                                                                                                                                                                              |            |
|--------------------------|-----|--------------------------------------------------------------------------------------------------------------------------------------------------------------------------------------------------------------|------------|
| Participants             | 13* | (a) Report numbers of individuals at each stage of study—eg numbers potentially eligible, examined for eligibility, confirmed eligible, included in the study, completing follow-up, and analysed            | 12         |
|                          |     | (b) Give reasons for non-participation at each stage                                                                                                                                                         | NA         |
|                          |     | (c) Consider use of a flow diagram                                                                                                                                                                           | NA         |
| Descriptive data         | 14* | (a) Give characteristics of study participants (eg demographic, clinical, social) and information on exposures and potential confounders                                                                     | 12         |
|                          |     | (b) Indicate number of participants with missing data for each variable of interest                                                                                                                          | NA         |
| Outcome data             | 15* | Report numbers of outcome events or summary measures                                                                                                                                                         | 12, 13, 14 |
| Main results             | 16  | (a) Give unadjusted estimates and, if applicable, confounder-adjusted estimates and their precision (eg, 95% confidence interval). Make clear which confounders were adjusted for and why they were included | 13         |
|                          |     | (b) Report category boundaries when continuous variables were categorized                                                                                                                                    | NA         |
|                          |     | (c) If relevant, consider translating estimates of relative risk into absolute risk for a meaningful time period                                                                                             | NA         |
| Other analyses           | 17  | Report other analyses done—eg analyses of subgroups and interactions, and sensitivity analyses                                                                                                               | 12, 13, 14 |
| <b>Discussion</b>        |     |                                                                                                                                                                                                              |            |
| Key results              | 18  | Summarise key results with reference to study objectives                                                                                                                                                     | 15         |
| Limitations              | 19  | Discuss limitations of the study, taking into account sources of potential bias or imprecision. Discuss both direction and magnitude of any potential bias                                                   | 17, 18     |
| Interpretation           | 20  | Give a cautious overall interpretation of results considering objectives, limitations, multiplicity of analyses, results from similar studies, and other relevant evidence                                   | 15, 16, 17 |
| Generalisability         | 21  | Discuss the generalisability (external validity) of the study results                                                                                                                                        | 17         |
| <b>Other information</b> |     |                                                                                                                                                                                                              |            |
| Funding                  | 22  | Give the source of funding and the role of the funders for the present study and, if applicable, for the original study on which the present article is based                                                | 4          |

\*Give information separately for cases and controls in case-control studies and, if applicable, for exposed and unexposed groups in cohort and cross-sectional studies.

**Note:** An Explanation and Elaboration article discusses each checklist item and gives methodological background and published examples of transparent reporting. The STROBE checklist is best used in conjunction with this article (freely available on the Web sites of PLoS Medicine at <http://www.plosmedicine.org/>, Annals of Internal Medicine at <http://www.annals.org/>, and Epidemiology at <http://www.epidem.com/>). Information on the STROBE Initiative is available at [www.strobe-statement.org](http://www.strobe-statement.org).
